# Supplementary material for: Organochalcogen substituted dimesityl borane-imidazoles as fluorogenic fluoride and cyanide sensors in aqueous media
Source: Royal Society of Chemistry journal article supplement (doi:10.1039/d2an02095e), 2023-01-01
Supplement: d2an02095e1.pdf [file d2an02095e1.pdf]

# Supporting Information

## Organochalcogen Substituted Dimesityl Borane- Imidazole as Fluorogenic Fluoride and Cyanide Sensors in Aqueous Media

Sabeeha Parveen, Farha Naaz, Dasari L. V. K. Prasad\* and Ganapathi Anantharaman\*

[dprasad@iitk.ac.in](mailto:dprasad@iitk.ac.in), [garaman@iitk.ac.in](mailto:garaman@iitk.ac.in)

*Department of Chemistry, Indian Institute of Technology Kanpur, Kanpur, India-208016*

### Table of contents:

| Title                                                                                                                                                                                              | Page No. |
|----------------------------------------------------------------------------------------------------------------------------------------------------------------------------------------------------|----------|
| Crystallographic data and structure refinements for <b>6-8</b> , <b>11</b> , <b>7</b> -[CN], <b>8</b> -[F], <b>8</b> -[CN], <b>9</b> -[F] and <b>11</b> -[F]                                       | S2-S4    |
| Bond parameters for <b>6-8</b> , <b>11</b> , <b>7</b> -[CN], <b>8</b> -[F], <b>8</b> -[CN], <b>9</b> -[F] and <b>11</b> -[F]                                                                       | S5-S10   |
| Crystal structures of <b>6</b> , <b>11</b> , and <b>8</b> -[CN]                                                                                                                                    | S11      |
| Fluoride binding constants of BMe <sub>2</sub> -containing organoborane compounds from the literature                                                                                              | S12      |
| Calculation of detection limit for <b>7</b> with CN in CH <sub>3</sub> CN:H <sub>2</sub> O(1:1)                                                                                                    | S13      |
| Absorbance and emission of compound <b>7</b> in various solvents and Photophysical properties of compound <b>7</b> in various solvents                                                             | S14      |
| Absorbance spectra and anion binding constant calculations for compounds <b>1</b> , <b>8-11</b> and Details of titration of <b>1</b> , <b>7</b> and <b>8</b> with TBAF, and TBACN in aqueous media | S15-S30  |
| Anion binding constant values for <b>7-11</b>                                                                                                                                                      | S31      |
| NMR Spectra of compounds                                                                                                                                                                           | S32-S50  |
| IR spectra of <b>7,8</b> , <b>7</b> -[CN] and <b>8</b> -[CN]                                                                                                                                       | S51      |
| Selectivity of <b>7-11</b> with various anions                                                                                                                                                     | S52-S53  |
| Calculated binding energy curves of B-X (where X is F <sup>-</sup> /CN <sup>-</sup> anion) in acetonitrile (blue) and water (red) solvent reaction fields                                          | S54      |
| Calculated binding energy values of B-X (where X is F <sup>-</sup> /CN <sup>-</sup> anion) in acetonitrile and water solvent reaction fields                                                       | S55      |
| Cartesian coordinates of the optimized imidazole and imidazolium complexes studied at B3LYP/6-31+g(d) level of theory                                                                              | S56-S83  |
| Lifetime measurements data for compounds <b>7</b> and <b>8</b> as well as competitive anion binding                                                                                                | S84-85   |
| Reversibility experiments of compound <b>7</b>                                                                                                                                                     | S86      |

**Table S1: Crystallographic data and structure refinements for compounds**

| Compound                                                                              | <b>6</b>                                          | <b>7</b>                                          | <b>8</b>                                           |
|---------------------------------------------------------------------------------------|---------------------------------------------------|---------------------------------------------------|----------------------------------------------------|
| Empirical formula                                                                     | C <sub>34</sub> H <sub>37</sub> BN <sub>2</sub> P | C <sub>28</sub> H <sub>31</sub> BN <sub>2</sub> S | C <sub>28</sub> H <sub>31</sub> BN <sub>2</sub> Se |
| Formula weight                                                                        | 515.43                                            | 438.42                                            | 485.32                                             |
| Crystal system                                                                        | monoclinic                                        | orthorhombic                                      | monoclinic                                         |
| Space group                                                                           | <i>P2<sub>1</sub>/n</i>                           | <i>Pbca</i>                                       | <i>P2<sub>1</sub>/c</i>                            |
| <i>a</i> (Å)                                                                          | 15.112(2)                                         | 13.4720(6)                                        | 14.2614(11)                                        |
| <i>b</i> (Å)                                                                          | 14.106(2)                                         | 16.3785(8)                                        | 14.9900(11)                                        |
| <i>c</i> (Å)                                                                          | 15.546(2)                                         | 22.3897(10)                                       | 12.0328(9)                                         |
| $\alpha$ , deg                                                                        | 90                                                | 90                                                | 90                                                 |
| $\beta$ , deg                                                                         | 118.500(3)                                        | 90                                                | 112.336(2)                                         |
| $\gamma$ , deg                                                                        | 90                                                | 90                                                | 90                                                 |
| Volume/Å <sup>3</sup>                                                                 | 2912.2(8)                                         | 4940.3(4)                                         | 2379.4(3)                                          |
| <i>Z</i>                                                                              | 4                                                 | 8                                                 | 4                                                  |
| $\rho_{\text{calc}}$ g/cm <sup>3</sup>                                                | 1.176                                             | 1.179                                             | 1.355                                              |
| $\mu$ , mm <sup>-1</sup>                                                              | 0.119                                             | 0.149                                             | 1.597                                              |
| <i>F</i> (000)                                                                        | 1100.0                                            | 1872.0                                            | 1008.0                                             |
| Temperature/K                                                                         | 100                                               | 100                                               | 100                                                |
| Reflections collected                                                                 | 41305                                             | 56748                                             | 38401                                              |
| Indep. reflns                                                                         | 7286                                              | 4229                                              | 5908                                               |
| Data/restraints/parameters                                                            | 7286/0/326                                        | 4229/0/296                                        | 5908/0/296                                         |
| GOOF                                                                                  | 1.043                                             | 1.028                                             | 1.027                                              |
| <i>R</i> <sub>1</sub> / <i>wR</i> <sub>2</sub> [ <i>I</i> >= 2 $\sigma$ ( <i>I</i> )] | 0.0572/0.1403                                     | 0.0367/0.0919                                     | 0.0311/0.0725                                      |
| <i>R</i> <sub>1</sub> / <i>wR</i> <sub>2</sub> [all data]                             | 0.0922/0.1689                                     | 0.0457/0.1018                                     | 0.0417/0.0784                                      |

**Table S1 Contd...**

| Compound                                                                     | <b>11</b>                                                                        | <b>11</b> -[F]                                     | <b>7</b> -[CN]                                    |
|------------------------------------------------------------------------------|----------------------------------------------------------------------------------|----------------------------------------------------|---------------------------------------------------|
| Empirical formula                                                            | C <sub>36</sub> H <sub>39</sub> BF <sub>3</sub> N <sub>2</sub> O <sub>3</sub> PS | C <sub>35</sub> H <sub>39</sub> BFN <sub>2</sub> P | C <sub>45</sub> H <sub>67</sub> BN <sub>4</sub> S |
| Formula weight                                                               | 678.53                                                                           | 548.46                                             | 706.89                                            |
| Crystal system                                                               | monoclinic                                                                       | monoclinic                                         | monoclinic                                        |
| Space group                                                                  | <i>P2<sub>1</sub>/n</i>                                                          | <i>P2<sub>1</sub>/c</i>                            | <i>P2<sub>1</sub>/n</i>                           |
| <i>a</i> (Å)                                                                 | 12.4503(11)                                                                      | 12.8449(3)                                         | 11.7479(12)                                       |
| <i>b</i> (Å)                                                                 | 10.8386(9)                                                                       | 15.6528(3)                                         | 24.278(3)                                         |
| <i>c</i> (Å)                                                                 | 25.637(2)                                                                        | 15.9764(5)                                         | 16.0030(16)                                       |
| $\alpha$ , deg                                                               | 90                                                                               | 90                                                 | 90                                                |
| $\beta$ , deg                                                                | 90.125(3)                                                                        | 108.0330(10)                                       | 110.599(3)                                        |
| $\gamma$ , deg                                                               | 90                                                                               | 90                                                 | 90                                                |
| Volume/Å <sup>3</sup>                                                        | 3459.6(5)                                                                        | 3054.40(13)                                        | 4272.4(8)                                         |
| <i>Z</i>                                                                     | 4                                                                                | 4                                                  | 4                                                 |
| $\rho_{\text{calc}}$ g/cm <sup>3</sup>                                       | 1.303                                                                            | 1.193                                              | 1.099                                             |
| $\mu$ , mm <sup>-1</sup>                                                     | 0.194                                                                            | 0.119                                              | 0.110                                             |
| <i>F</i> (000)                                                               | 1424.0                                                                           | 1012.0                                             | 1544.0                                            |
| Temperature/K                                                                | 100                                                                              | 100                                                | 100                                               |
| Reflections collected                                                        | 45944                                                                            | 37420                                              | 67903                                             |
| Indep. reflns                                                                | 6798                                                                             | 5399                                               | 10571                                             |
| Data/restraints/parameters                                                   | 6798/0/432                                                                       | 5399/0/369                                         | 10571/0/471                                       |
| GOOF                                                                         | 1.123                                                                            | 1.050                                              | 1.037                                             |
| <i>R</i> <sub>1</sub> / <i>wR</i> <sub>2</sub> [ <i>I</i> ≥ 2σ ( <i>I</i> )] | 0.0515/ 0.1015                                                                   | 0.0509/ 0.1311                                     | 0.0563/ 0.1369                                    |
| <i>R</i> <sub>1</sub> / <i>wR</i> <sub>2</sub> [all data]                    | 0.0618/0.1058                                                                    | 0.0578/ 0.1368                                     | 0.0897/ 0.1587                                    |

**Table S1 Contd...**

| Compound                                                                     | <b>8</b> -[F]                                       | <b>8</b> -[CN]                                     | <b>9</b> -[F]                                      |
|------------------------------------------------------------------------------|-----------------------------------------------------|----------------------------------------------------|----------------------------------------------------|
| Empirical formula                                                            | C <sub>44</sub> H <sub>67</sub> BFN <sub>3</sub> Se | C <sub>45</sub> H <sub>67</sub> BN <sub>4</sub> Se | C <sub>29</sub> H <sub>34</sub> BFN <sub>2</sub> S |
| Formula weight                                                               | 746.77                                              | 753.80                                             | 472.45                                             |
| Crystal system                                                               | monoclinic                                          | monoclinic                                         | triclinic                                          |
| Space group                                                                  | <i>P2<sub>1</sub>/n</i>                             | <i>P2<sub>1</sub>/n</i>                            | <i>P</i> -1                                        |
| <i>a</i> (Å)                                                                 | 13.5024(14)                                         | 11.6472(5)                                         | 8.2537(18)                                         |
| <i>b</i> (Å)                                                                 | 20.021(2)                                           | 24.2300(12)                                        | 12.713(3)                                          |
| <i>c</i> (Å)                                                                 | 15.4145(16)                                         | 16.1687(8)                                         | 13.316(3)                                          |
| $\alpha$ , deg                                                               | 90                                                  | 90                                                 | 104.864(6)                                         |
| $\beta$ , deg                                                                | 98.496(3)                                           | 110.482(2)                                         | 98.674(6)                                          |
| $\gamma$ , deg                                                               | 90                                                  | 90                                                 | 106.478(6)                                         |
| Volume/Å <sup>3</sup>                                                        | 4121.4(7)                                           | 4274.5(4)                                          | 1256.8(5)                                          |
| <i>Z</i>                                                                     | 4                                                   | 4                                                  | 2                                                  |
| $\rho_{\text{calc}}$ /cm <sup>3</sup>                                        | 1.204                                               | 1.171                                              | 1.248                                              |
| $\mu$ , mm <sup>-1</sup>                                                     | 0.949                                               | 0.913                                              | 0.157                                              |
| <i>F</i> (000)                                                               | 1600.0                                              | 1616.0                                             | 504.0                                              |
| Temperature/K                                                                | 100                                                 | 100                                                | 100                                                |
| Reflections collected                                                        | 64816                                               | 60245                                              | 13789                                              |
| Indep. reflns                                                                | 10239                                               | 10356                                              | 4381                                               |
| Data/restraints/parameters                                                   | 10239/0/462                                         | 10356/0/471                                        | 4381/0/297                                         |
| GOOF                                                                         | 0.967                                               | 1.045                                              | 1.128                                              |
| <i>R</i> <sub>1</sub> / <i>wR</i> <sub>2</sub> [ <i>I</i> ≥ 2σ ( <i>I</i> )] | 0.0348/ 0.1110                                      | 0.0499/ 0.1083                                     | 0.1153/0.2958                                      |
| <i>R</i> <sub>1</sub> / <i>wR</i> <sub>2</sub> [all data]                    | 0.0527/ 0.1306                                      | 0.0888/ 0.1223                                     | 0.1272/0.3023                                      |

**Table S2: Selected bond parameters of compounds 7 and 8**

| <b>Compound</b>     | <b>7</b>                   | <b>8</b>                         |
|---------------------|----------------------------|----------------------------------|
| <b>Bond</b>         | N1-C2 1.360(2),            | N1-C2 1.356(2),                  |
| <b>Distance (Å)</b> | N1-C5 1.392(2),            | N1-C5 1.396(2),                  |
|                     | N1-C6 1.454(2),            | N1-C6 1.464(2),                  |
|                     | N3-C2 1.324(2),            | N3-C2 1.330(2),                  |
|                     | N3-C4 1.363(2),            | N3-C4 1.361(2),                  |
|                     | C5-C4 1.383(2),            | C4-C5 1.389(2),                  |
|                     | C5-B1 1.541(2),            | C5-B1 1.534(2),                  |
|                     | C2-S1 1.7512(17),          | Se1-C2 1.9053(17)                |
|                     | C25-S1 1.7823(17),         | Se1-C25 1.9300(18) ,             |
|                     | C7-B1 1.582(2)             | C7-B1 1.577(2),                  |
|                     | C16-B1 1.574(2),           | C16-B1 1.576(2),                 |
| <b>Bond</b>         | C5-N1-C6 126.33(13), N3-   | C2-Se1-C25 93.18(7), C2-N1-C5    |
| <b>Angles (°)</b>   | C4-C5 112.52(15), C2-N1-C5 | 107.43(14), C2-N1-C6 125.61(15), |
|                     | 107.29(13),                | C5-N1-C6 126.71(14), C2-N3-C4    |
|                     | C2-N1-C6 126.17(14), C2-   | 104.05(14), N3-C4-C5 112.62(15), |
|                     | N3-C4 104.18(14), N1-C5-B1 | N1-C2-Se1 123.02(13), N3-C2-Se1  |
|                     | 127.90(14), C4-C5-N1       | 124.21(13), N3-C2-N1 112.63(15), |
|                     | 103.47(14), C4-C5-B1       | N1-C5-B1 128.37(15), C4-C5-N1    |
|                     | 128.14(15), N1-C2-S1       | 103.25(14), C4-C5-B1 126.35(16), |
|                     | 124.43(13), N3-C2-N1       | C5-B1-C16 117.24(15), C5-B1-C7   |
|                     | 112.49(15), N3-C2-S1       | 118.27(15), C16-B1-C7 124.46(15) |
|                     | 122.84(13), C5-B1-C16      |                                  |
|                     | 116.17(14), C5-B1-C7       |                                  |
|                     | 120.42(14), C16-B1-C7      |                                  |
|                     | 123.41(15), C2-S1-C25      |                                  |
|                     | 102.89(8)                  |                                  |

**Selected bond parameters of compounds 6 and 11**

| <b>Compound</b>          | <b>6</b>                                                                                                                                                                                                                                 | <b>11</b>                                                                                                                                                                                                                                                                                                                                                                     |
|--------------------------|------------------------------------------------------------------------------------------------------------------------------------------------------------------------------------------------------------------------------------------|-------------------------------------------------------------------------------------------------------------------------------------------------------------------------------------------------------------------------------------------------------------------------------------------------------------------------------------------------------------------------------|
| <b>Bond distance (Å)</b> | C5 B1 1.537(3),<br>C5 C4 1.389(3),<br>P1 C2 1.829(2),<br>N1 C5 1.389(2),<br>N1 C2 1.362(3),<br>N3 C4 1.360(3),<br>N3 C2 1.336(3),<br>C7 B1 1.571(3),<br>C16 B1 1.580(3),<br>P1 C31 1.833(2),<br>P1 C25 1.827(2),<br>N1 C6 1.457(3)       | C5 B1 1.552(3),<br>C5 C4 1.362(3),<br>P1 C2 1.842(2) ,<br>N1 C5 1.395(3) ,<br>N1 C2 1.344(3) ,<br>N3 C4 1.364(3) ,<br>N3 C2 1.356(3) ,<br>C8 B1 1.579(3),<br>C17 B1 1.573(3),<br>P1 C26 1.828(2) ,<br>P1 C32 1.828(2),<br>N3 C7 1.471(3) ,<br>N1 C6 1.467(3)                                                                                                                  |
| <b>Bond angles (°)</b>   | C5 B1 C7 121.52(17),<br>C5 B1 C16<br>115.04(17),<br>C7 B1 C16<br>123.34(17),<br>N1 C2 P1<br>122.63(15),<br>N3 C2 P1<br>125.63(15),<br>N3 C2 N1 111.71(17),<br>N3 C4 C5 112.83(18),<br>N1 C5 C4<br>103.05(17),<br>N1 C5 B1<br>129.05(18), | C26 P1 C2 104.70(10),<br>C32 P1 C2 99.05(10) ,<br>C32 P1 C26 103.17(10),<br>C2 N3 C4 108.75(17) ,<br>C2 N3 C7 128.75(17) ,<br>C4 N3 C7 122.46(17) ,<br>C2 N1 C5 110.67(17) ,<br>C2 N1 C6 124.23(18) ,<br>C5 N1 C6 125.06(17),<br>N3 C2 P1 132.87(16),<br>N1 C2 P1 120.10(15),<br>N1 C2 N3 106.66(17),<br>N1 C5 B1 129.59(19),<br>C4 C5 N1 104.46(18),<br>C4 C5 B1 125.39(19), |

C4 C5 B1 127.40(18) C5 B1 C8 113.58(19),  
 C5 B1 C17 121.54(19)

**Selected bond parameters of compound 7-[CN], 8-[F] and 8-[CN]**

| Compound                 | 7-[CN]                                                                                                                                                                                                                                                  | 8-[F]                                                                                                                                                                                                                                                                         | 8-[CN]                                                                                                                                                                                                                                                 |
|--------------------------|---------------------------------------------------------------------------------------------------------------------------------------------------------------------------------------------------------------------------------------------------------|-------------------------------------------------------------------------------------------------------------------------------------------------------------------------------------------------------------------------------------------------------------------------------|--------------------------------------------------------------------------------------------------------------------------------------------------------------------------------------------------------------------------------------------------------|
| <b>Bond distance (Å)</b> | S1-C2 1.751(2),<br>S1-C25 1.791(2),<br>C31-B1 1.634(3),<br>C5-C4 1.379(2)<br>C5-B1 1.623(3),<br>N1-C5 1.389(2),<br>N1-C2 1.362(2),<br>N1-C6 1.451(2),<br>N3-C4 1.372(2),<br>N3-C2 1.326(2),<br>C16-B1 1.654(3) ,<br>C7-B1 1.659(3) ,<br>C31-B1 1.634(3) | Se1-C2 1.8943(18),<br>Se1-C25 1.9215(19),<br>F1-B1 1.483(2),<br>C5-C4 1.373(2),<br>C5-B1 1.633(2)<br>N1-C5 1.389(2),<br>C8-C7 1.416(2),<br>N1-C2 1.362(2),<br>N1-C6 1.454(2),<br>N3-C2 1.321(2),<br>N3-C4 1.380(2),<br>C8-C9 1.404(2),<br>C7-B1 1.660(2),<br>C16-B1 1.660(2), | Se1-C2 1.889(2),<br>Se1-C26 1.932(3),<br>C7-B1 1.626(4),<br>C5-C4 1.375(3),<br>C5-B1 1.625(4)<br>N1-C5 1.385(3),<br>N1-C2 1.360(3),<br>N1-C6 1.459(3),<br>N2-C2 1.317(3),<br>N2-C4 1.372(3),<br>N4-C7 1.150(3),<br>C17-B1 1.657(4),<br>C8-B1 1.659(4), |
| <b>Bond Angle (°)</b>    | C2-S1-C25<br>101.78(10),<br>C5-N1-C6<br>126.08(16),<br>C2-N1-C5<br>108.41(15),<br>C2-N1-C6<br>125.44(16),<br>N3-C4-C5<br>112.86(16),                                                                                                                    | C2-Se1-C25<br>100.62(8),<br>C5-N1-C6<br>126.80(14),<br>C2-N1-C5<br>108.06(14),<br>C5-C4-N3<br>112.89(15),<br>C2-N1-C6<br>125.00(14),                                                                                                                                          | C2-Se1-C26<br>98.93(12),<br>C5-N1-C6 125.9(2),<br>C2-N1-C5 108.5(2),<br>C2-N1-C6 125.5(2),<br>C2-N2-C4 104.2(2),<br>N4-C7-B1 173.1(3),<br>N1-C5-B1 128.1(2),<br>C4-C5-N1 102.8(2),<br>C4-C5-B1 129.1(2),                                               |

|             |                      |                    |
|-------------|----------------------|--------------------|
| N1-C2-S1    | C2-N3-C4             | C17-B1-C8          |
| 123.08(15), | 103.66(14),          | 114.2(2),          |
| C2-N3-C4    | C8-C7-B1 127.54(15), | C7-B1-C17          |
| 104.13(16), | N1-C5-B1             | 113.2(2),          |
| N3-C2-S1    | 125.42(14),          | C7-B1-C8           |
| 125.22(15), | C4-C5-N1             | 101.91(19),        |
| N3-C2-N1    | 103.14(14),          | N1-C2-Se1          |
| 111.69(16), | C4-C5-B1 130.87(15), | 123.41(18),        |
| N1-C5-B1    | N1-C2-Se1            | C5-B1-C17          |
| 128.09(15), | 123.32(13),          | 103.94(19),        |
| C16 B1 C7   | N3-C2-Se1            | N2-C2-Se1          |
| 114.05(15), | 124.01(13),          | 124.85(19),        |
| C4-C5-N1    | N3-C2-N1             | C5-B1-C7 105.4(2), |
| 102.88(15), | 112.24(15),          | N2-C2-N1 111.7(2), |
| C31-B1-C16  | F1-B1-C16            | C5-B1-C8 118.2(2), |
| 113.31(15), | 111.87(13),          | N2-C4-C5 112.8(2)  |
| C4-C5-B1    | F1-B1-C5 102.53(13), |                    |
| 129.02(16), | F1-B1-C7 103.23(12), |                    |
| C31-B1-C7   | C16-B1-C7            |                    |
| 101.82(14), | 114.94(13),          |                    |
| C5-B1-C16   | C5-B1-C16            |                    |
| 104.16(14), | 104.65(13),          |                    |
| C5-B1-C7    | C5-B1-C7 119.03(14)  |                    |
| 118.55(15), |                      |                    |
| C5-B1-C31   |                      |                    |
| 104.89(15)  |                      |                    |



**Selected bond parameters of compounds 9-[F] and 11-[F]**

| <b>Compound</b>          | <b>9-[F]</b>                                                                                                                                                                                                                                                                                                                            | <b>11-[F]</b>                                                                                                                                                                                                                                                        |
|--------------------------|-----------------------------------------------------------------------------------------------------------------------------------------------------------------------------------------------------------------------------------------------------------------------------------------------------------------------------------------|----------------------------------------------------------------------------------------------------------------------------------------------------------------------------------------------------------------------------------------------------------------------|
| <b>Bond distance (Å)</b> | S1-C2 1.754(6),<br>S1-C26 1.792(7),<br>F1-B1 1.470(8),<br>N1-C2 1.356(7),<br>N1-C6 1.461(8),<br>N1-C5 1.383(8),<br>N3-C2 1.336(8),<br>N3-C4 1.381(8),<br>N3-C7 1.456(8),<br>C8-B1 1.648(9),<br>C4-C5 1.372(9),<br>C5-B1 1.649(9),<br>C17-B1 1.658(10)                                                                                   | C5-B1 1.644(5),<br>C4-C5 1.365(4)<br>P1-C2 1.818(3),<br>P1-C8 1.827(3),<br>P1-C14 1.817(4),<br>F1-B1 1.462(4),<br>N1-C2 1.357(4),<br>N1-C5 1.397(4),<br>N1-C6 1.465(4),<br>N3 -C2 1.348(4),<br>N3-C4 1.379(4),<br>N3-C7 1.472(4),                                    |
| <b>Bond Angle (°)</b>    | C2-S1-C26 102.5(3),<br>C2-N1-C6 123.4(5),<br>C2-N1-C5 110.2(5),<br>C5-N1-C6 126.3(5),<br>C2-N3-C4 107.9(5),<br>C2-N3-C7 126.9(5),<br>C4-N3-C7 125.1(5),<br>C9-C8-B1 126.6(5),<br>C5-C4-N3 109.4(6),<br>N1-C5-B1 126.6(5),<br>C4-C5-N1 104.5(5),<br>C4-C5-B1 128.4(6),<br>N1-C2-S1 126.0(5),<br>N3-C2-S1 125.1(4),<br>N3-C2-N1 107.9(5), | C5-C4-N3 109.4(3),<br>N1-C5-B1 127.5(3),<br>C4-C5-N1 103.9(3),<br>C4-C5-B1 128.6(3),<br>N1-C2-P1 123.3(2),<br>N3-C2-P1 130.6(2),<br>N3-C2-N1 106.0(3),<br>C2-N1-C5 111.4(3),<br>C2-N1-C6 124.2(3),<br>C5-N1-C6 124.3(3),<br>C2-N3-C4 109.1(3),<br>C2-N3-C7 127.2(3), |

F1-B1-C8 102.5(5),  
F1-B1-C17 111.0(5),  
F1-B1-C5 104.5(5),  
C8-B1-C17 119.7(5),  
C8-B1-C5 117.0(5),  
C5-B1-C17 101.3(5)

Crystal structures of **6**, **11**, and **8**-[CN]

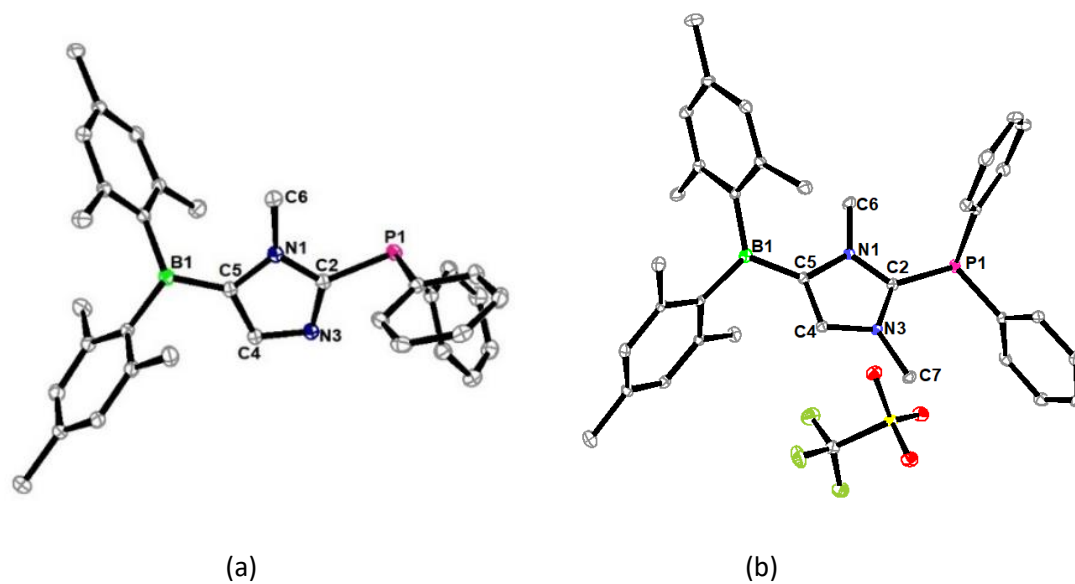

**Figure S1:** (a) Crystal structures of **6** and (b) **11**. Hydrogen atoms have been omitted for clarity (30 % ellipsoid probability)

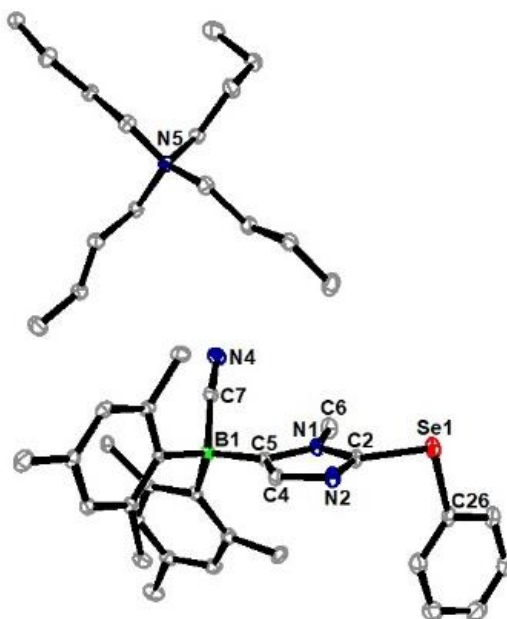

**Figure S2:** Crystal structure of **8**-[CN]. Hydrogen atoms have been omitted for clarity (30 % ellipsoid probability).

**Table S3:** Fluoride binding constants of BMe<sub>2</sub>-containing organoborane compounds from the literature (compounds **(a)-(k)**) listed in chart 1

| Compound       | Solvent                                  | Binding constant (M <sup>-1</sup> )          |
|----------------|------------------------------------------|----------------------------------------------|
| <b>(a)</b>     | THF                                      | 8.9(1.9) x 10 <sup>4</sup>                   |
| <b>(b)</b>     | THF                                      | 5.0 X 10 <sup>7</sup>                        |
| <b>(c)</b>     | DCM                                      | 6.3 X 10 <sup>4</sup> -8.3 X 10 <sup>4</sup> |
| <b>(d),(g)</b> | CHCl <sub>3</sub> /H <sub>2</sub> O      | 10 <sup>8</sup>                              |
| <b>(f)</b>     | MeOH                                     | ±420                                         |
| <b>(h)</b>     | CH <sub>3</sub> CN:H <sub>2</sub> O(1:1) | 2.15 X 10 <sup>5</sup>                       |
| <b>(i)</b>     | DMSO:H <sub>2</sub> O(3:1)               | 1.9 (3 )X10 <sup>2</sup>                     |
| <b>(j)</b>     | THF                                      | 5 x 10 <sup>9</sup>                          |
| <b>(k)</b>     | THF:H <sub>2</sub> O (4:1)               | 1.4 (±0.1) X10 <sup>4</sup>                  |

**Table S4: Calculation of detection limit for 7 with CN in CH<sub>3</sub>CN:H<sub>2</sub>O(1:1) :**

| Blank reading for 7            | Normalized Intensity |
|--------------------------------|----------------------|
| Reading 1                      | 1.0                  |
| Reading 2                      | 0.99513              |
| Reading 3                      | 0.99661              |
| Reading 4                      | 0.99764              |
| Standard deviation( $\sigma$ ) | 0.00177              |

**The limit of detection was calculated by formula**

$$\text{Detection limit} = -3\sigma/m$$

Where,  $\sigma$  = standard deviation of blank readings and  $m$  is slope of fluorescence intensity vs. concentration of the TBACN obtained via linear regression

$$= -3 \times 0.00177 / -0.02262$$

$$= 0.234 \text{ mM}$$

$$= 234 \mu\text{M}$$

$$= (234 \times 268.48) / 1000$$

$$= 62.8 \text{ ppm}$$

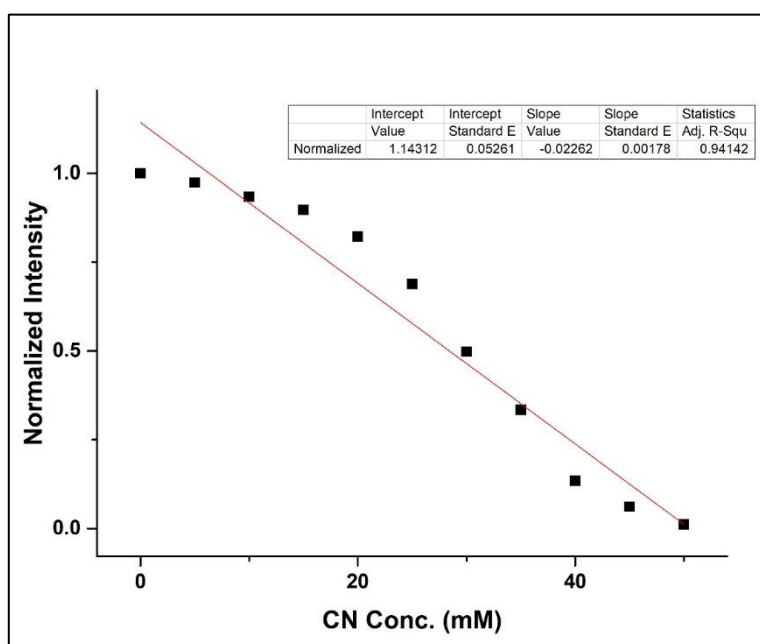

**Figure S3: Linear Regression of fluorescence intensity of 7 with increasing concentration of CN**

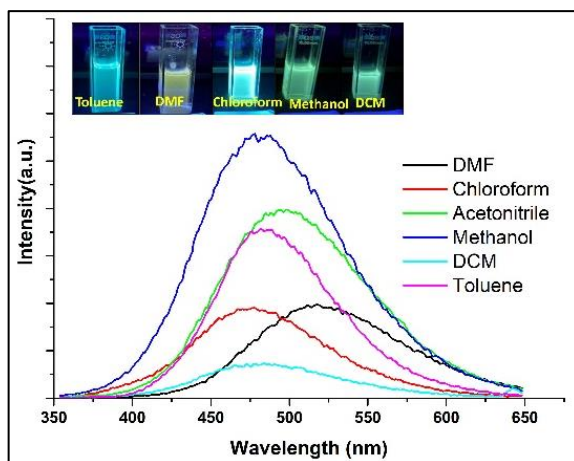

**Figure S4:** Absorbance and emission of compound **7** in various solvents (25  $\mu\text{M}$ )

**Table S5:** Photophysical properties of compound **7** in various solvents

| Solvent      | $\lambda_{\text{max}}^{\text{a}}$ (nm) | $\lambda_{\text{em}}$ (nm) | $\Delta\nu^{\text{b}}$ ( $\text{cm}^{-1}$ ) |
|--------------|----------------------------------------|----------------------------|---------------------------------------------|
| DMF          | 332                                    | 520                        | 10890                                       |
| Chloroform   | 333                                    | 478                        | 9110                                        |
| Acetonitrile | 330                                    | 515                        | 10885                                       |
| Methanol     | 331                                    | 478                        | 9291                                        |
| DCM          | 334                                    | 485                        | 9322                                        |
| Toluene      | 332                                    | 480                        | 9287                                        |

$\lambda_{\text{max}}$ [a] Longest absorption maxima wavelength (absorbance)  $\lambda_{\text{em}}$  (emission) [b] Stokes shift  $\Delta\nu$  ( $1/\lambda_{\text{max}} - 1/\lambda_{\text{em}}$ )

## Binding Constant Calculations:

### Benesi-Henderson (BH) Method:

The slope was calculated by Linear fit in the graph between  $1/A-A_0$  and  $1/F$  via origin software.

The BH Equation for 1:1 complexation was used to calculate the K constant:

$$1/A-A_0 = 1/ K (A_{\max}-A_0) \times [X^-] + 1/A_{\max}-A_0 \text{ (For turn-on)}$$

$$1/A_0-A = 1/ K (A_0-A_{\max}) \times [X^-] + 1/A_0-A_{\max} \text{ (For turn-off,)}$$

(All the compounds in here display turn-off fluorescence)

A = Absorbance,  $A_0$  = Absorbance at initial host concentration (compounds **7-11**),  $A_{\max}$  = Absorbance at maximum guest ( $X^-$ ) concentration. ( $X = F$  or  $CN$ )

### For compound 7:

Acetonitrile solution of **7** (2 mL,  $2.5 \times 10^{-5}$  M) in a cuvette was titrated against incremental addition (10  $\mu$ L) of TBAX ( $X = F, CN$ ) in acetonitrile. The changes observed in the absorption band at 330 nm were noted for the further calculations. The experimental absorbance data is given below. The fluoride binding constant of **7** was calculated using Bindfit online package and BH method.

### For Compound 7-[F]:

| Equivalence of fluoride ion | Fluoride concentration | Absorbance (A) |
|-----------------------------|------------------------|----------------|
| 0.0                         | 0                      | 0.71511        |
| 0.1                         | 3.73134E-6             | 0.67528        |
| 0.2                         | 7.42574E-6             | 0.63308        |
| 0.3                         | 1.10837E-5             | 0.58954        |
| 0.4                         | 1.47059E-5             | 0.54658        |
| 0.5                         | 1.82927E-5             | 0.50301        |
| 0.6                         | 2.18447E-5             | 0.45616        |
| 0.7                         | 2.53623E-5             | 0.41202        |
| 0.8                         | 2.88462E-5             | 0.36026        |
| 0.9                         | 3.22967E-5             | 0.30325        |
| 1.0                         | 3.57143E-5             | 0.24497        |
| 1.1                         | 3.90995E-5             | 0.187          |

**For Compound 7-[CN]:**

| Equivalence of cyanide ion | Cyanide concentration | Absorbance (A) |
|----------------------------|-----------------------|----------------|
| 0.0                        | 0                     | 0.618          |
| 0.1                        | 2.48756E-6            | 0.548          |
| 0.2                        | 4.9505E-6             | 0.492          |
| 0.3                        | 7.38916E-6            | 0.418          |
| 0.4                        | 9.80392E-6            | 0.347          |
| 0.5                        | 1.21951E-5            | 0.3            |
| 0.6                        | 1.45631E-5            | 0.218          |
| 0.7                        | 1.69082E-5            | 0.138          |
| 0.8                        | 1.92308E-5            | 0.101          |
| 0.9                        | 2.15311E-5            | 0.039          |
| 1.0                        | 2.38095E-5            | 0.009          |

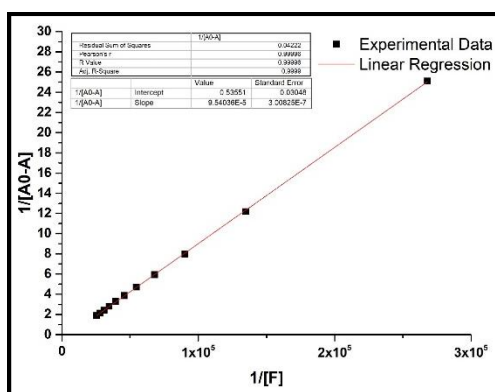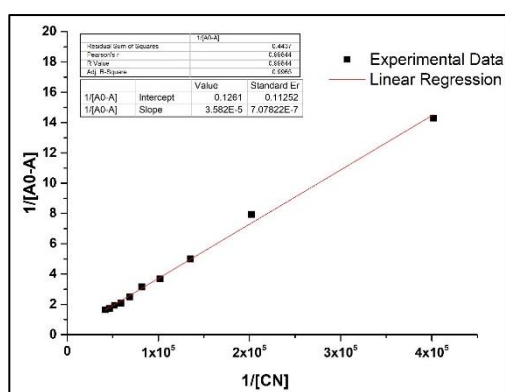

**Figure S5:** BH plot of **7** vs TBAF (left) and BH plot of **7** vs TBACN (right)

**For compound 8:**

Acetonitrile solution of **8** (2 mL,  $2.5 \times 10^{-5}$  M) in a cuvette was titrated against incremental addition (10  $\mu$ L) of TBAX (X = F, CN) in acetonitrile. The changes observed in the absorption band at 330 nm were noted for the further calculations. The experimental absorbance data is given below. The fluoride binding constant of **8** was calculated using Bindfit online package and BH method.



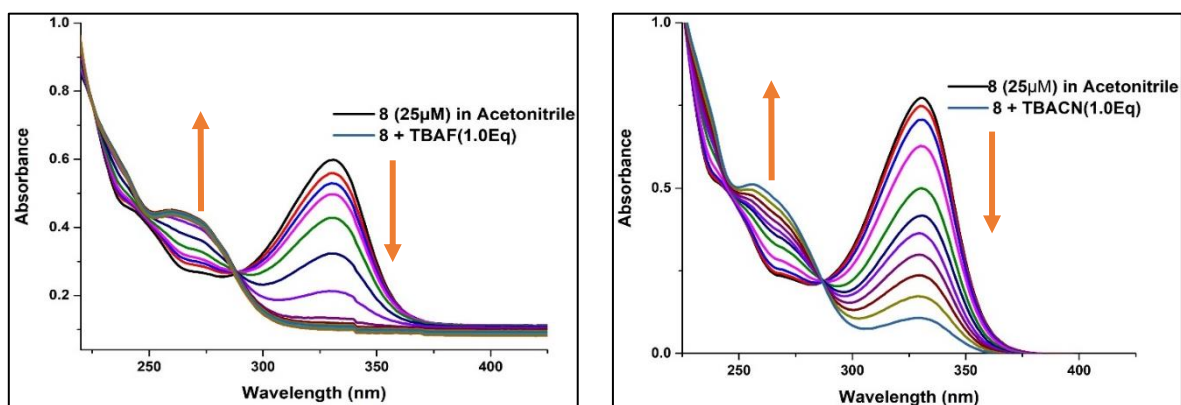

(a)

(b)

**Figure S6:** Change in absorption spectra upon addition of (a) TBAF and (b) TBACN in compound **8**.

**For Compound 8-[F]:**

| Equivalence of fluoride ion | Fluoride concentration | Absorbance (A) |
|-----------------------------|------------------------|----------------|
| 0.0                         | 0                      | 0.59754        |
| 0.1                         | 3.73134E-6             | 0.55935        |
| 0.2                         | 7.42574E-6             | 0.5292         |
| 0.3                         | 1.10837E-5             | 0.49723        |
| 0.4                         | 1.47059E-5             | 0.42805        |
| 0.5                         | 1.82927E-5             | 0.32308        |
| 0.6                         | 2.18447E-5             | 0.21255        |
| 0.7                         | 2.53623E-5             | 0.13377        |
| 0.8                         | 2.88462E-5             | 0.11933        |
| 0.9                         | 3.22967E-5             | 0.1135         |
| 1.0                         | 3.57143E-5             | 0.10979        |

**For Compound 8-[CN]:**

| Equivalence of cyanide ion | Cyanide concentration | Absorbance (A) |
|----------------------------|-----------------------|----------------|
| 0.0                        | 0                     | 0.77268        |
| 0.1                        | 2.49169E-6            | 0.74812        |
| 0.2                        | 4.96689E-6            | 0.70708        |
| 0.3                        | 7.42574E-6            | 0.62664        |
| 0.4                        | 9.86842E-6            | 0.49885        |
| 0.5                        | 1.22951E-5            | 0.41649        |

|     |            |         |
|-----|------------|---------|
| 0.6 | 1.47059E-5 | 0.36165 |
| 0.7 | 1.7101E-5  | 0.29727 |
| 0.8 | 1.94805E-5 | 0.23527 |
| 0.9 | 2.18447E-5 | 0.17123 |
| 1.0 | 2.41935E-5 | 0.10665 |

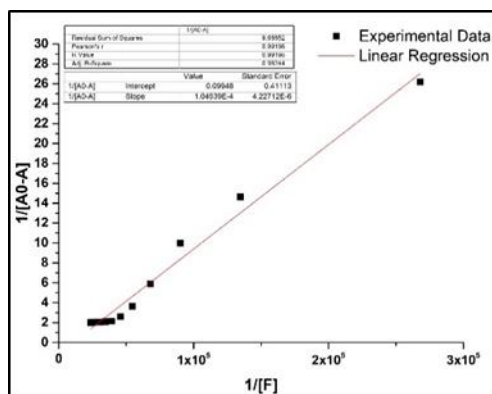

(a)

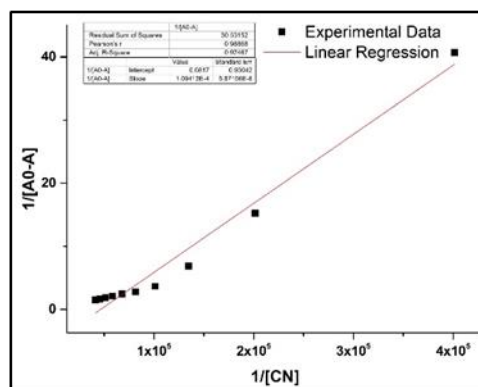

(b)

Figure S7: BH plot of **8** Vs TBAF (left) and BH plot of **8** Vs TBACN (right).

#### For compound **9**:

Acetonitrile solution of **9** (2 mL,  $5 \times 10^{-5}$  M) in a cuvette was titrated against incremental addition (10  $\mu$ L) of TBAX (X = F, CN) in acetonitrile. The changes observed in the absorption band at 330 nm were noted for further calculations. The experimental absorbance data is given below. The fluoride binding constant of **9** was calculated using Bindfit online package and BH method.

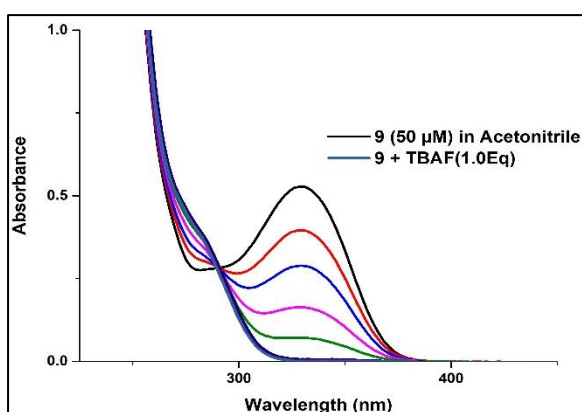

(a)

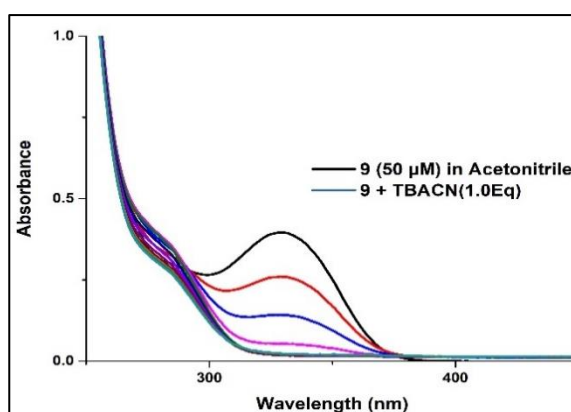

(b)

Figure S8: The Change in absorption spectra upon addition of (a) TBAF and (b) TBACN in **9**.

**For Compound 9-[F]:**

| Equivalence of fluoride ion | Fluoride concentration | Absorbance (A) |
|-----------------------------|------------------------|----------------|
| 0.0                         | 0                      | 0.52306        |
| 0.1                         | 4.97512E-6             | 0.39179        |
| 0.2                         | 9.90099E-6             | 0.28593        |
| 0.3                         | 1.47783E-5             | 0.16202        |
| 0.4                         | 1.96078E-5             | 0.07133        |
| 0.5                         | 2.43902E-5             | 0.00828        |
| 0.6                         | 2.91262E-5             | 0.00296        |
| 0.7                         | 3.38164E-5             | 0.00319        |
| 0.8                         | 3.84615E-5             | 0.00221        |
| 0.9                         | 4.30622E-5             | 0.00120        |
| 1.0                         | 4.7619E-5              | 0.00118        |

**For Compound 9-[CN]:**

| Equivalence of cyanide ion | Cyanide concentration | Absorbance (A) |
|----------------------------|-----------------------|----------------|
| 0.0                        | 0                     | 0.39179        |
| 0.1                        | 4.97512E-6            | 0.25801        |
| 0.2                        | 9.90099E-6            | 0.14156        |
| 0.3                        | 1.47783E-5            | 0.05364        |
| 0.4                        | 1.96078E-5            | 0.02442        |
| 0.5                        | 2.43902E-5            | 0.02341        |
| 0.6                        | 2.91262E-5            | 0.02077        |
| 0.7                        | 3.38164E-5            | 0.02073        |
| 0.8                        | 3.84615E-5            | 0.01935        |
| 0.9                        | 4.30622E-5            | 0.01911        |

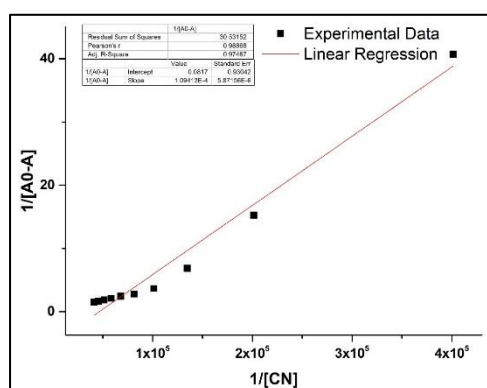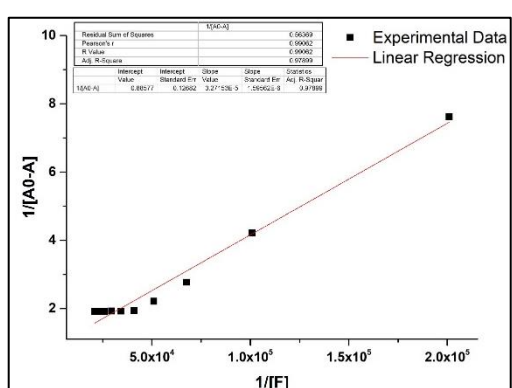

**Figure S9:** BH plot of 9 Vs TBAF (left) and BH plot of 9 Vs TBACN (right).

**For compound 10:**

Acetonitrile solution of **10** (2 mL,  $1 \times 10^{-4}$  M) in a cuvette was titrated against incremental addition (10  $\mu$ L) of TBAX (X = F, CN) in acetonitrile. The changes observed in the absorption band at 330 nm were noted for further calculations. The experimental absorbance data is given below. The fluoride binding constant of **10** was calculated using BH method.

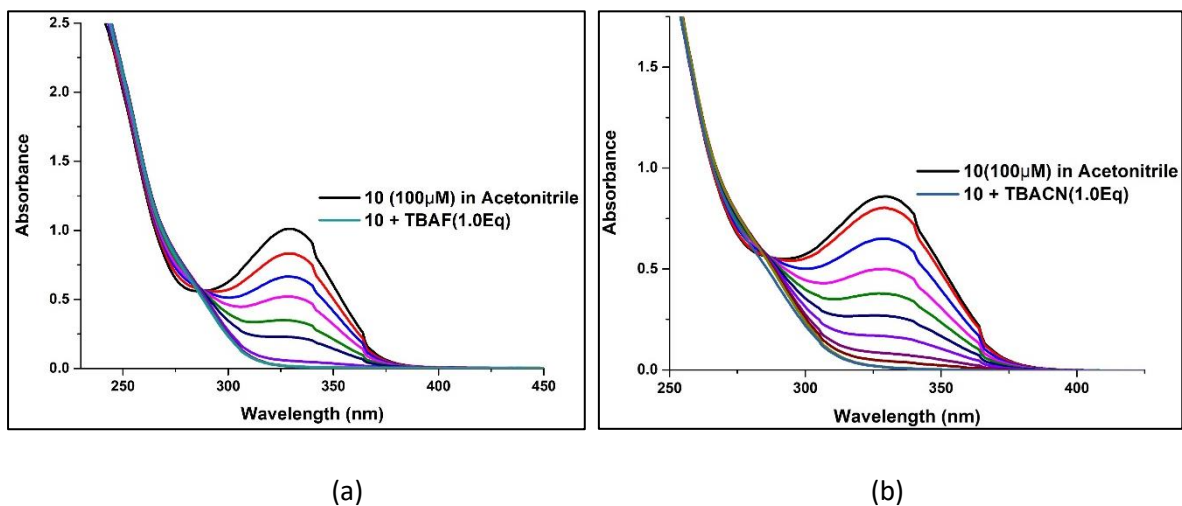

**Figure S10:** The change in absorption spectra upon addition of (a) TBAF and (b) TBACN in **10**.

**For Compound 10-[F]:**

| Equivalence of Fluoride ion | Fluoride concentration | Absorbance (A) |
|-----------------------------|------------------------|----------------|
| 0.0                         | 0                      | 0.998          |
| 0.1                         | 9.95025E-6             | 0.82           |
| 0.2                         | 1.9802E-5              | 0.657          |
| 0.3                         | 2.95567E-5             | 0.512          |
| 0.4                         | 3.92157E-5             | 0.34           |
| 0.5                         | 4.87805E-5             | 0.222          |
| 0.6                         | 5.82524E-5             | 0.052          |
| 0.7                         | 6.76329E-5             | 0.014          |
| 0.8                         | 7.69231E-5             | 0.013          |
| 0.9                         | 8.61244E-5             | 0.012          |
| 1.0                         | 9.52381E-5             | 0.011          |

**For Compound 10-[CN]:**

| Equivalence of Cyanide ion | Cyanide concentration | Absorbance (A) |
|----------------------------|-----------------------|----------------|
| 0.0                        | 0                     | 0.854          |
| 0.1                        | 9.95025E-6            | 0.796          |
| 0.2                        | 1.9802E-5             | 0.644          |
| 0.3                        | 2.95567E-5            | 0.494          |
| 0.4                        | 3.92157E-5            | 0.373          |
| 0.5                        | 4.87805E-5            | 0.264          |
| 0.6                        | 5.82524E-5            | 0.164          |
| 0.7                        | 6.76329E-5            | 0.08           |
| 0.8                        | 7.69231E-5            | 0.042          |
| 0.9                        | 8.61244E-5            | 0.012          |
| 1                          | 9.52381E-5            | 0.01           |

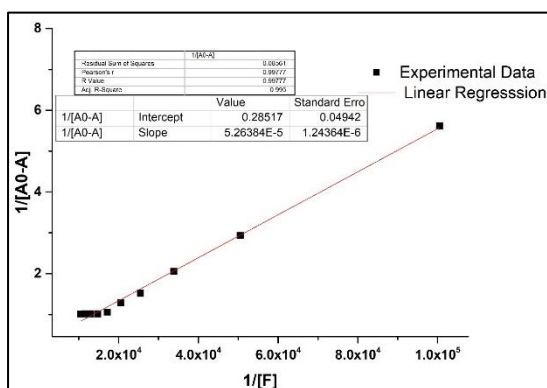

(a)

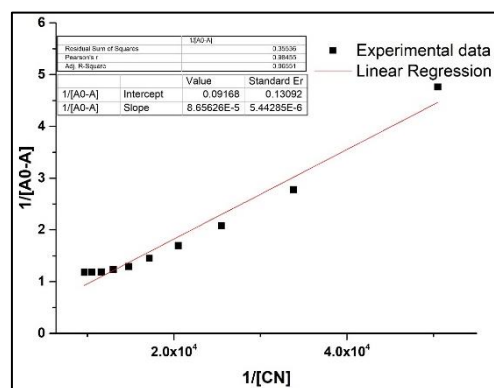

(b)

**Figure S11:** (a) BH plot of **10** Vs TBAF and (b) BH plot of **10** Vs TBACN

**For compound 11:**

Acetonitrile solution of **11** (2 mL,  $1 \times 10^{-4}$  M) in a cuvette was titrated against incremental addition (10  $\mu$ L) of TBAX (X=F, CN) in Acetonitrile. The changes observed in the absorption band at 330 nm were noted for the further calculations. The experimental absorbance data is given below. The fluoride binding constant of **11** was calculated using BH method.

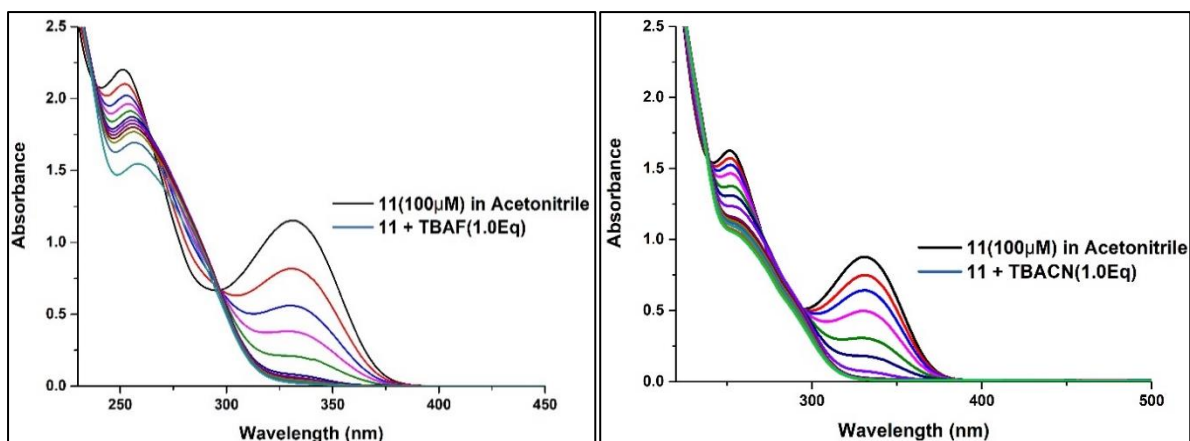

(a)

(b)

**Figure S12:** The change in UV-Vis absorption spectra upon addition of (a)TBAF and (b) TBACN of **11**

**For Compound 11-[F]:**

| Equivalence of fluoride ion | Fluoride concentration | Absorbance (A) |
|-----------------------------|------------------------|----------------|
| 0.0                         | 0                      | 1.15069        |
| 0.1                         | 9.95025E-6             | 0.74896        |
| 0.2                         | 1.9802E-5              | 0.64253        |
| 0.3                         | 2.95567E-5             | 0.49724        |
| 0.4                         | 3.92157E-5             | 0.30756        |
| 0.5                         | 4.87805E-5             | 0.18208        |
| 0.6                         | 5.82524E-5             | 0.0749         |
| 0.7                         | 6.76329E-5             | 0.02899        |
| 0.8                         | 7.69231E-5             | 0.01981        |
| 0.9                         | 8.61244E-5             | 0.01935        |
| 1.0                         | 9.52381E-5             | 0.01934        |

**For Compound 11-[CN]:**

| Equivalence of Cyanide ion | Cyanide concentration | Absorbance (A) |
|----------------------------|-----------------------|----------------|
| 0.0                        | 0                     | 0.87762        |
| 0.1                        | 9.95025E-6            | 0.74896        |
| 0.2                        | 1.9802E-5             | 0.64253        |
| 0.3                        | 2.95567E-5            | 0.49724        |
| 0.4                        | 3.92157E-5            | 0.30756        |

|     |            |         |
|-----|------------|---------|
| 0.5 | 4.87805E-5 | 0.18208 |
| 0.6 | 5.82524E-5 | 0.0749  |
| 0.7 | 6.76329E-5 | 0.02899 |
| 0.8 | 7.69231E-5 | 0.01981 |
| 0.9 | 8.61244E-5 | 0.01935 |
| 1.0 | 9.52381E-5 | 0.01934 |

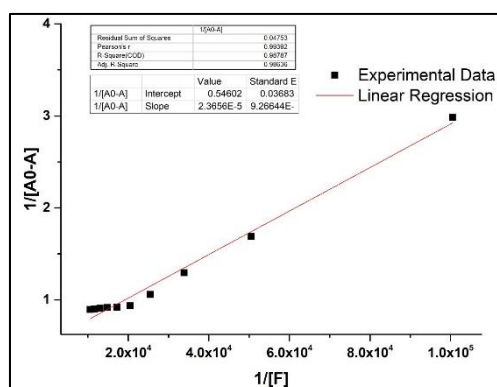

(a)

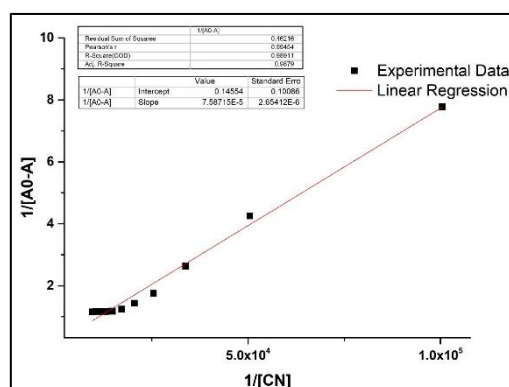

(b)

Figure S13: (a) BH plot of **11** Vs TBAF(left) and (b) BH plot of **11** Vs TBACN(right).

Details of titration of **1**, **7** and **8** with TBAF, and TBACN in aqueous media:

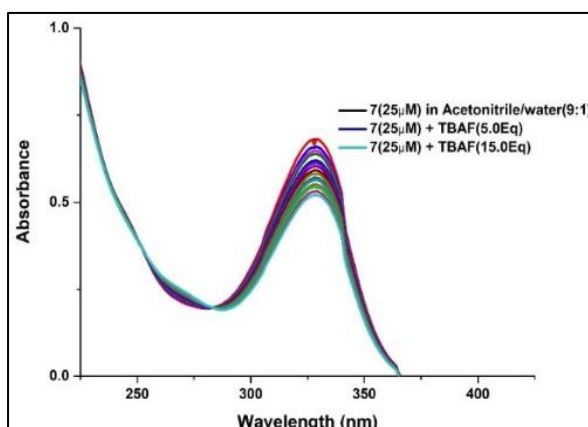

(a)

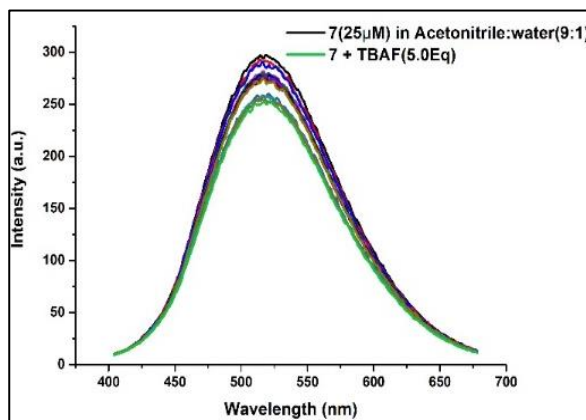

(b)

Figure S14: (a) Absorbance and (b) emission spectra of titration of **7** in acetonitrile:water (9:1) (25  $\mu$ M) upon incremental addition of TBAF.

**For Compound 7-[F] in Acetonitrile:water (9:1)**

| Equivalence of fluoride ion | Fluoride concentration | Absorbance(A) |
|-----------------------------|------------------------|---------------|
| 0                           | 0                      | 0.68          |
| 1                           | 2.48756E-5             | 0.665         |
| 2                           | 4.9505E-5              | 0.657         |
| 3                           | 7.38916E-5             | 0.648         |
| 4                           | 9.80392E-5             | 0.639         |
| 5                           | 1.21951E-4             | 0.619         |
| 6                           | 1.45631E-4             | 0.612         |
| 7                           | 1.69082E-4             | 0.603         |
| 8                           | 1.92308E-4             | 0.591         |
| 9                           | 2.15311E-4             | 0.581         |
| 10                          | 2.38095E-4             | 0.571         |
| 11                          | 2.60664E-4             | 0.564         |
| 12                          | 2.83019E-4             | 0.551         |
| 13                          | 3.05164E-4             | 0.544         |
| 14                          | 3.27103E-4             | 0.53          |
| 15                          | 3.48837E-4             | 0.52          |

**For Compound 7-[CN] in Acetonitrile: water (9:1):**

| Equivalence of cyanide ion | Cyanide concentration | Absorbance(A) |
|----------------------------|-----------------------|---------------|
| 0                          | 0                     | 0.648         |
| 0.1                        | 2.48756E-6            | 0.643         |
| 0.2                        | 4.9505E-6             | 0.636         |
| 0.3                        | 7.38916E-6            | 0.63          |
| 0.4                        | 9.80392E-6            | 0.62          |
| 0.5                        | 1.21951E-5            | 0.606         |



|     |            |       |
|-----|------------|-------|
| 0.6 | 1.45631E-5 | 0.591 |
| 0.7 | 1.69082E-5 | 0.577 |
| 0.8 | 1.92308E-5 | 0.556 |
| 0.9 | 2.15311E-5 | 0.535 |
| 1   | 2.38095E-5 | 0.508 |
| 1.2 | 2.83019E-5 | 0.469 |
| 1.4 | 3.27103E-5 | 0.435 |
| 1.6 | 3.7037E-5  | 0.405 |
| 1.8 | 4.12844E-5 | 0.367 |
| 2   | 4.54545E-5 | 0.329 |
| 2.2 | 4.95495E-5 | 0.288 |
| 2.4 | 5.35714E-5 | 0.252 |
| 2.6 | 5.75221E-5 | 0.217 |
| 2.8 | 6.14035E-5 | 0.184 |
| 3   | 6.52174E-5 | 0.145 |
| 3.2 | 6.89655E-5 | 0.112 |
| 3.4 | 7.26496E-5 | 0.085 |
| 3.6 | 7.62712E-5 | 0.064 |
| 3.8 | 7.98319E-5 | 0.05  |
| 4   | 8.33333E-5 | 0.038 |
| 4.2 | 8.67769E-5 | 0.028 |
| 4.4 | 9.01639E-5 | 0.021 |
| 4.6 | 9.34959E-5 | 0.015 |
| 4.8 | 9.67742E-5 | 0.012 |
| 5   | 1E-4       | 0.008 |

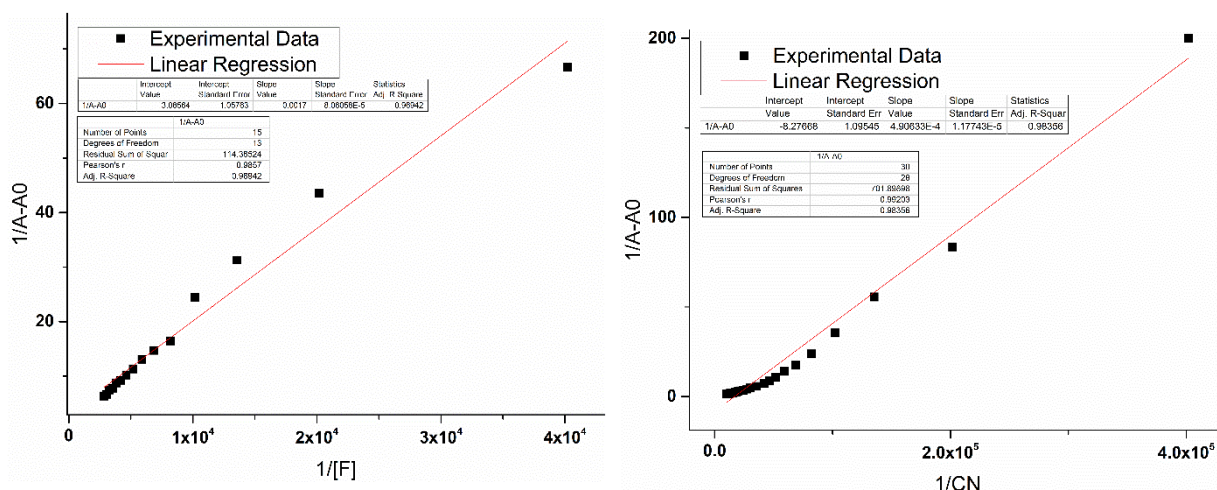

Figure S14(ii): BH plot of **7** Vs TBAF (left) and BH plot of **7** Vs TBACN (right) in CH<sub>3</sub>CN:water (9:1).

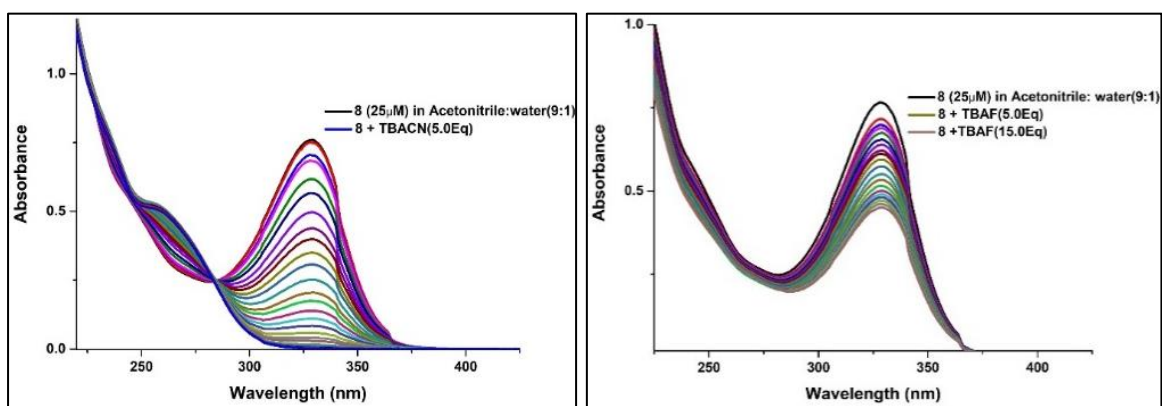

(a)

(b)

Figure S15(i): Absorbance spectra of titration of **8** in acetonitrile:water (9:1) (25 μM) upon incremental addition of (a) TBAF and (b) TBACN

For Compound **8**-[F] in Acetonitrile: water (9:1):

| Equivalence of Fluoride ion | Fluoride Concentration | Absorbance (A) |
|-----------------------------|------------------------|----------------|
| 0                           | 0                      | 0.766          |
| 1                           | 2.48756E-5             | 0.716          |
| 1.5                         | 3.72208E-5             | 0.699          |
| 2                           | 4.9505E-5              | 0.688          |
| 2.5                         | 6.17284E-5             | 0.673          |
| 3                           | 7.38916E-5             | 0.653          |
| 3.5                         | 8.59951E-5             | 0.638          |
| 4                           | 9.80392E-5             | 0.621          |
| 4.5                         | 1.10024E-4             | 0.612          |
| 5                           | 1.21951E-4             | 0.594          |
| 6                           | 1.45631E-4             | 0.573          |
| 7                           | 1.69082E-4             | 0.55           |

|    |            |       |
|----|------------|-------|
| 8  | 1.92308E-4 | 0.533 |
| 9  | 2.15311E-4 | 0.515 |
| 10 | 2.38095E-4 | 0.499 |
| 11 | 2.60664E-4 | 0.489 |
| 12 | 2.83019E-4 | 0.48  |
| 13 | 3.05164E-4 | 0.47  |
| 14 | 3.27103E-4 | 0.461 |
| 15 | 3.48837E-4 | 0.45  |

**For Compound 8-[CN] in Acetonitrile: water (9:1):**

| Equivalence of cyanide ion | Cyanide concentration | Absorbance(A) |
|----------------------------|-----------------------|---------------|
| 0                          | 0                     | 0.76          |
| 0.2                        | 4.9505E-6             | 0.749         |
| 0.4                        | 9.80392E-6            | 0.704         |
| 0.6                        | 1.45631E-5            | 0.683         |
| 0.8                        | 1.92308E-5            | 0.617         |
| 1                          | 2.38095E-5            | 0.566         |
| 1.2                        | 2.83019E-5            | 0.497         |
| 1.4                        | 3.27103E-5            | 0.439         |
| 1.6                        | 3.7037E-5             | 0.399         |
| 1.8                        | 4.12844E-5            | 0.35          |
| 2                          | 4.54545E-5            | 0.307         |
| 2.2                        | 4.95495E-5            | 0.252         |
| 2.4                        | 5.35714E-5            | 0.205         |
| 2.6                        | 5.75221E-5            | 0.175         |
| 2.8                        | 6.14035E-5            | 0.139         |
| 3                          | 6.52174E-5            | 0.11          |
| 3.2                        | 6.89655E-5            | 0.085         |
| 3.4                        | 7.26496E-5            | 0.059         |
| 3.6                        | 7.62712E-5            | 0.041         |
| 3.8                        | 7.98319E-5            | 0.029         |
| 4                          | 8.33333E-5            | 0.016         |
| 4.2                        | 8.67769E-5            | 0.01          |
| 4.4                        | 9.01639E-5            | 0.008         |
| 4.6                        | 9.34959E-5            | 0.004         |
| 4.8                        | 9.67742E-5            | 0.003         |
| 5                          | 1E-4                  | 0.002         |

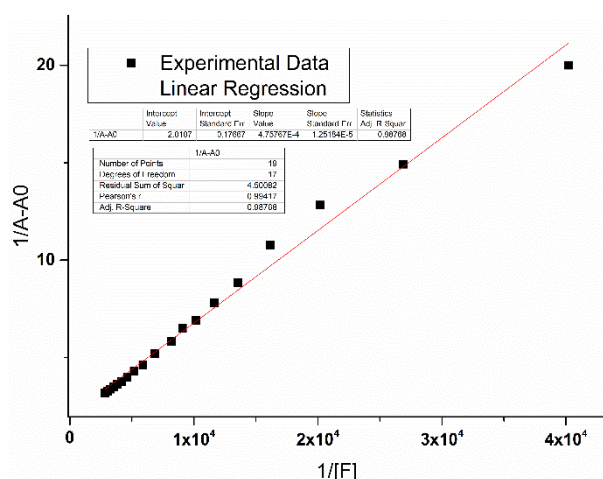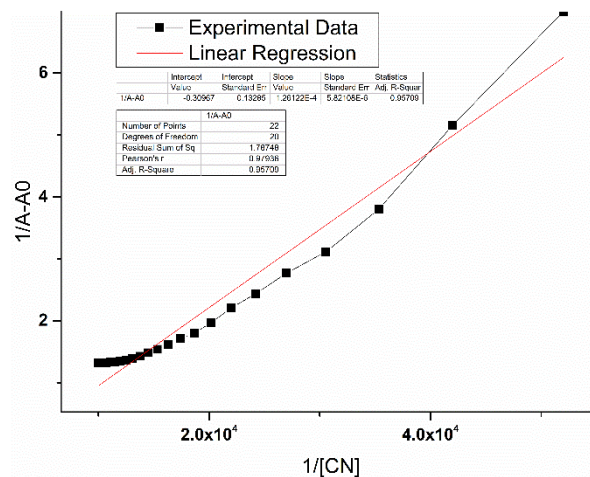

Figure S15(ii): BH plot of 8 Vs TBAF (left) and BH plot of 8 Vs TBACN (right) in acetonitrile:water (9:1).

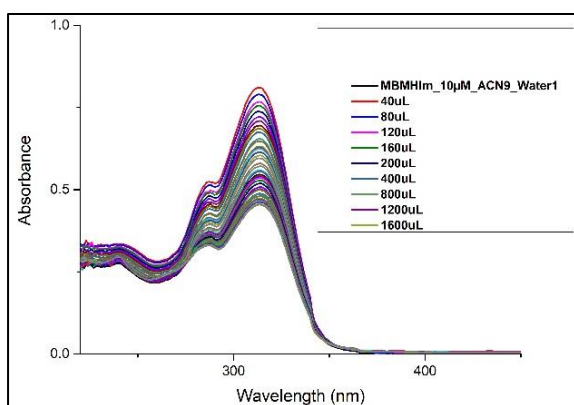

(a)

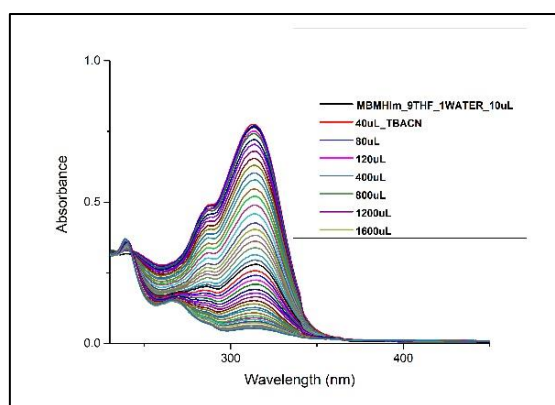

(b)

Figure S16 (i): The Change in absorption spectra upon addition of (a) TBAF and (b) TBACN in 1 in THF/water (9:1) (10 µM).

For Compound 1-[F] in THF: water (9:1):

| Equivalence of Fluoride ion | Fluoride concentration | Absorbance |
|-----------------------------|------------------------|------------|
| 0                           | 0                      | 0.799      |
| 1                           | 3.92157E-6             | 0.799      |
| 2                           | 7.69231E-6             | 0.781      |
| 3                           | 1.13208E-5             | 0.758      |
| 4                           | 1.48148E-5             | 0.747      |
| 5                           | 1.81818E-5             | 0.73       |
| 6                           | 2.14286E-5             | 0.713      |
| 7                           | 2.45614E-5             | 0.7        |
| 8                           | 2.75862E-5             | 0.687      |
| 9                           | 3.05085E-5             | 0.679      |
| 10                          | 3.33333E-5             | 0.668      |
| 11                          | 3.60656E-5             | 0.648      |

|    |            |       |
|----|------------|-------|
| 12 | 3.87097E-5 | 0.642 |
| 13 | 4.12698E-5 | 0.626 |
| 14 | 4.375E-5   | 0.622 |
| 15 | 4.61538E-5 | 0.617 |
| 16 | 4.84848E-5 | 0.609 |
| 17 | 5.07463E-5 | 0.598 |
| 18 | 5.29412E-5 | 0.589 |
| 19 | 5.50725E-5 | 0.574 |
| 20 | 5.71429E-5 | 0.567 |
| 21 | 5.91549E-5 | 0.554 |
| 22 | 6.11111E-5 | 0.55  |
| 23 | 6.30137E-5 | 0.542 |
| 24 | 6.48649E-5 | 0.537 |
| 25 | 6.66667E-5 | 0.535 |
| 26 | 6.84211E-5 | 0.531 |
| 27 | 7.01299E-5 | 0.524 |
| 28 | 7.17949E-5 | 0.514 |
| 29 | 7.34177E-5 | 0.504 |
| 30 | 7.5E-5     | 0.497 |
| 31 | 7.65432E-5 | 0.495 |
| 32 | 7.80488E-5 | 0.495 |
| 33 | 7.95181E-5 | 0.485 |
| 34 | 8.09524E-5 | 0.482 |
| 35 | 8.23529E-5 | 0.476 |
| 36 | 8.37209E-5 | 0.469 |
| 37 | 8.50575E-5 | 0.466 |
| 38 | 8.63636E-5 | 0.461 |
| 39 | 8.76404E-5 | 0.459 |
| 40 | 8.88889E-5 | 0.453 |
| 41 | 9.01099E-5 | 0.45  |
| 42 | 9.13043E-5 | 0.447 |

**For Compound 1-[CN] in THF: water (9:1):**

| Equivalence of Cyanide ion | Cyanide concentration | Absorbance |
|----------------------------|-----------------------|------------|
| 0                          | 0                     | 0.756      |
| 1                          | 3.92157E-6            | 0.766      |
| 2                          | 7.69231E-6            | 0.761      |
| 3                          | 1.13208E-5            | 0.743      |
| 4                          | 1.48148E-5            | 0.734      |
| 5                          | 1.81818E-5            | 0.713      |
| 6                          | 2.14286E-5            | 0.697      |
| 7                          | 2.45614E-5            | 0.674      |
| 8                          | 2.75862E-5            | 0.648      |
| 9                          | 3.05085E-5            | 0.625      |
| 10                         | 3.33333E-5            | 0.598      |
| 11                         | 3.60656E-5            | 0.574      |
| 12                         | 3.87097E-5            | 0.542      |

|    |            |       |
|----|------------|-------|
| 13 | 4.12698E-5 | 0.517 |
| 14 | 4.375E-5   | 0.486 |
| 15 | 4.61538E-5 | 0.455 |
| 16 | 4.84848E-5 | 0.423 |
| 17 | 5.07463E-5 | 0.401 |
| 18 | 5.29412E-5 | 0.381 |
| 19 | 5.50725E-5 | 0.36  |
| 20 | 5.71429E-5 | 0.337 |
| 21 | 5.91549E-5 | 0.312 |
| 22 | 6.11111E-5 | 0.293 |
| 23 | 6.30137E-5 | 0.279 |
| 24 | 6.48649E-5 | 0.256 |
| 25 | 6.66667E-5 | 0.24  |
| 26 | 6.84211E-5 | 0.223 |
| 27 | 7.01299E-5 | 0.209 |
| 28 | 7.17949E-5 | 0.191 |
| 29 | 7.34177E-5 | 0.178 |
| 30 | 7.5E-5     | 0.165 |
| 31 | 7.65432E-5 | 0.15  |
| 32 | 7.80488E-5 | 0.139 |
| 33 | 7.95181E-5 | 0.126 |
| 34 | 8.09524E-5 | 0.119 |
| 35 | 8.23529E-5 | 0.107 |
| 36 | 8.37209E-5 | 0.097 |
| 37 | 8.50575E-5 | 0.09  |
| 38 | 8.63636E-5 | 0.084 |
| 39 | 8.76404E-5 | 0.078 |
| 40 | 8.88889E-5 | 0.073 |
| 41 | 9.01099E-5 | 0.064 |
| 42 | 9.13043E-5 | 0.059 |

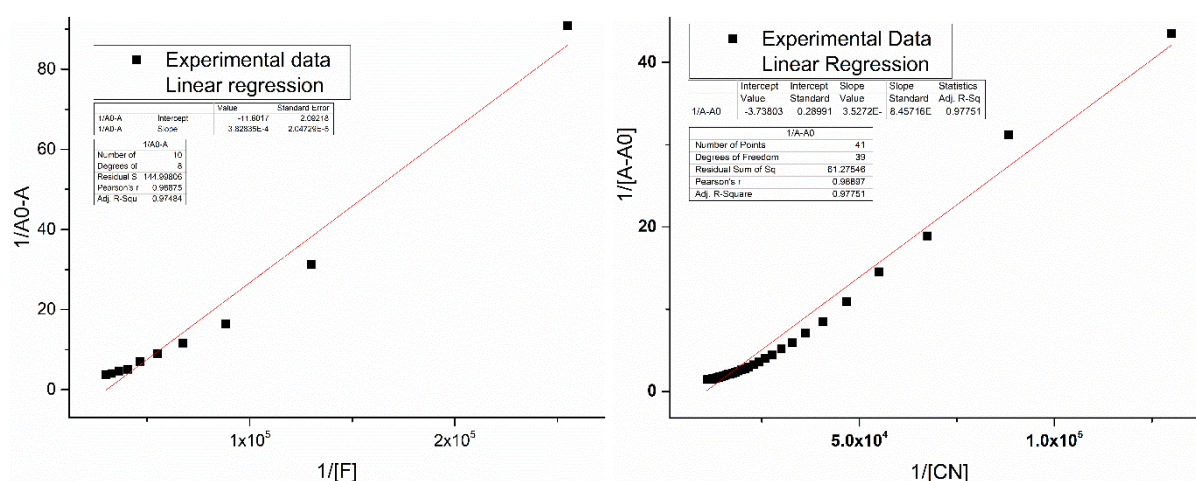

Figure S16(ii): BH plot of 1 Vs TBAF (left) and BH plot of 1 Vs TBACN (right) in THF:water (9:1).

**Table S6:** Anion binding constant values for **7-11**. It is to be noted that except for **7** (CN<sup>-</sup> binding), in all other cases the binding constants were calculated by assuming the reversibility between the substrate and anion binding (see the discussion in the main text).

| Comp.                   | Solvent                  | Fluoride Binding Constant (M <sup>-1</sup> ) |                        | Cyanide Binding Constant (M <sup>-1</sup> ) |                         |
|-------------------------|--------------------------|----------------------------------------------|------------------------|---------------------------------------------|-------------------------|
|                         |                          | BH Plot                                      | Bindfit                | BH Plot                                     | Bindfit                 |
| <b>1</b> <sup>10a</sup> | THF                      | 7.80 × 10 <sup>3</sup>                       | 1.40 × 10 <sup>4</sup> | 2.48 × 10 <sup>5</sup>                      | 1.47 × 10 <sup>3</sup>  |
| <b>1</b>                | THF/Water (9/1)          | 1.49 × 10 <sup>4</sup>                       | 3.02 × 10 <sup>6</sup> | 2.51 × 10 <sup>4</sup>                      | 2.72 × 10 <sup>6</sup>  |
| <b>4</b> <sup>10a</sup> | Acetonitrile             | 1.54 × 10 <sup>4</sup>                       | 5.21 × 10 <sup>3</sup> | 1.270 × 10 <sup>4</sup>                     | 4.844 × 10 <sup>4</sup> |
| <b>7</b>                | Acetonitrile             | 1.98 × 10 <sup>4</sup>                       | 3.91 × 10 <sup>4</sup> | -----                                       | -----                   |
| <b>7</b>                | Acetonitrile/Water (9/1) | 3.67 × 10 <sup>3</sup>                       | 4.09 × 10 <sup>6</sup> | -----                                       | -----                   |
| <b>8</b>                | Acetonitrile             | 2.2 × 10 <sup>4</sup>                        | 5.66 × 10 <sup>3</sup> | 1.37 × 10 <sup>4</sup>                      | 9.60 × 10 <sup>4</sup>  |
| <b>8</b>                | Acetonitrile/Water (9/1) | 6.65 × 10 <sup>3</sup>                       | 1.4 × 10 <sup>6</sup>  | 1.04 × 10 <sup>4</sup>                      | 3.30 × 10 <sup>6</sup>  |
| <b>9</b>                | Acetonitrile             | 1.47 × 10 <sup>4</sup>                       | 1.07 × 10 <sup>4</sup> | 5.85 × 10 <sup>4</sup>                      | 1.01 × 10 <sup>4</sup>  |
| <b>10</b>               | Acetonitrile             | 1.92 × 10 <sup>4</sup>                       | 3.33 × 10 <sup>4</sup> | 6.91 × 10 <sup>3</sup>                      | 4.95 × 10 <sup>4</sup>  |
| <b>11</b>               | Acetonitrile             | 2.82 × 10 <sup>4</sup>                       | 3.24 × 10 <sup>4</sup> | 1.53 × 10 <sup>4</sup>                      | 4.33 × 10 <sup>4</sup>  |

NMR spectra of compounds:

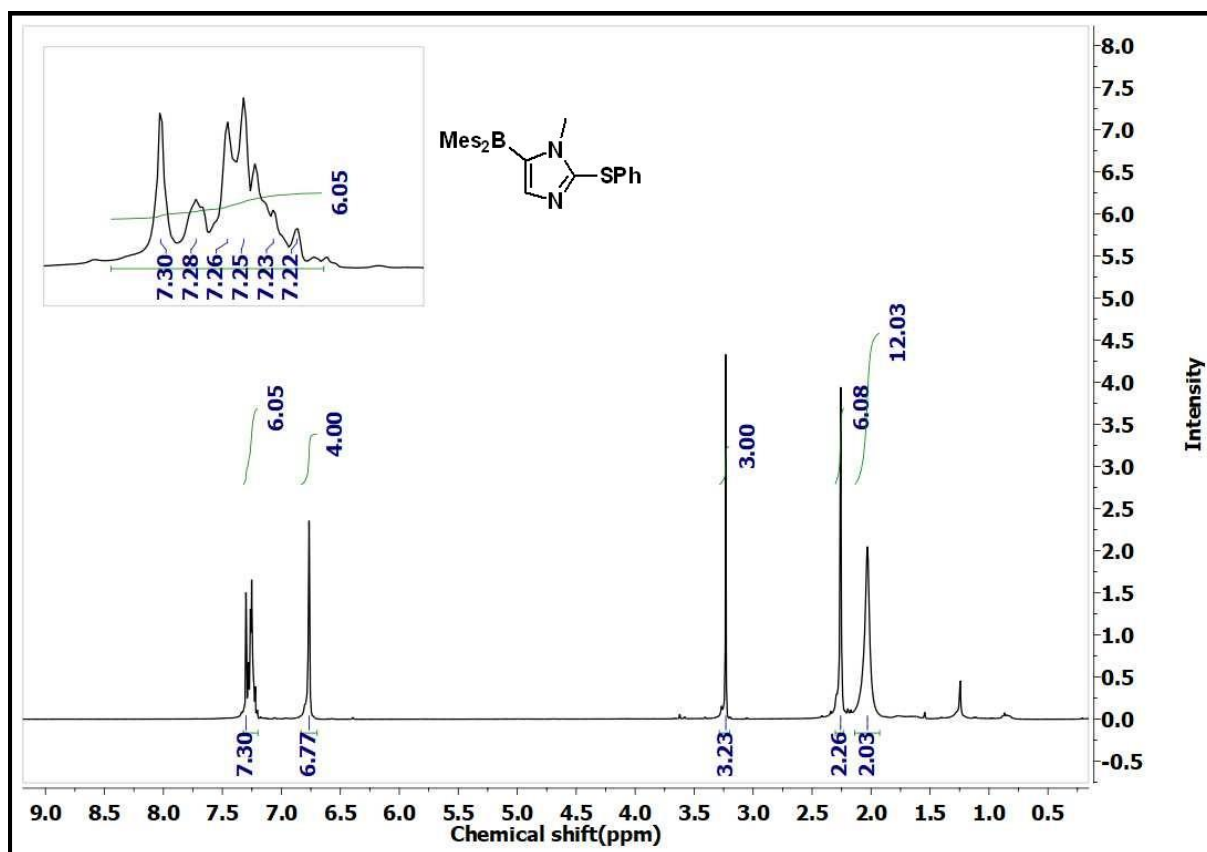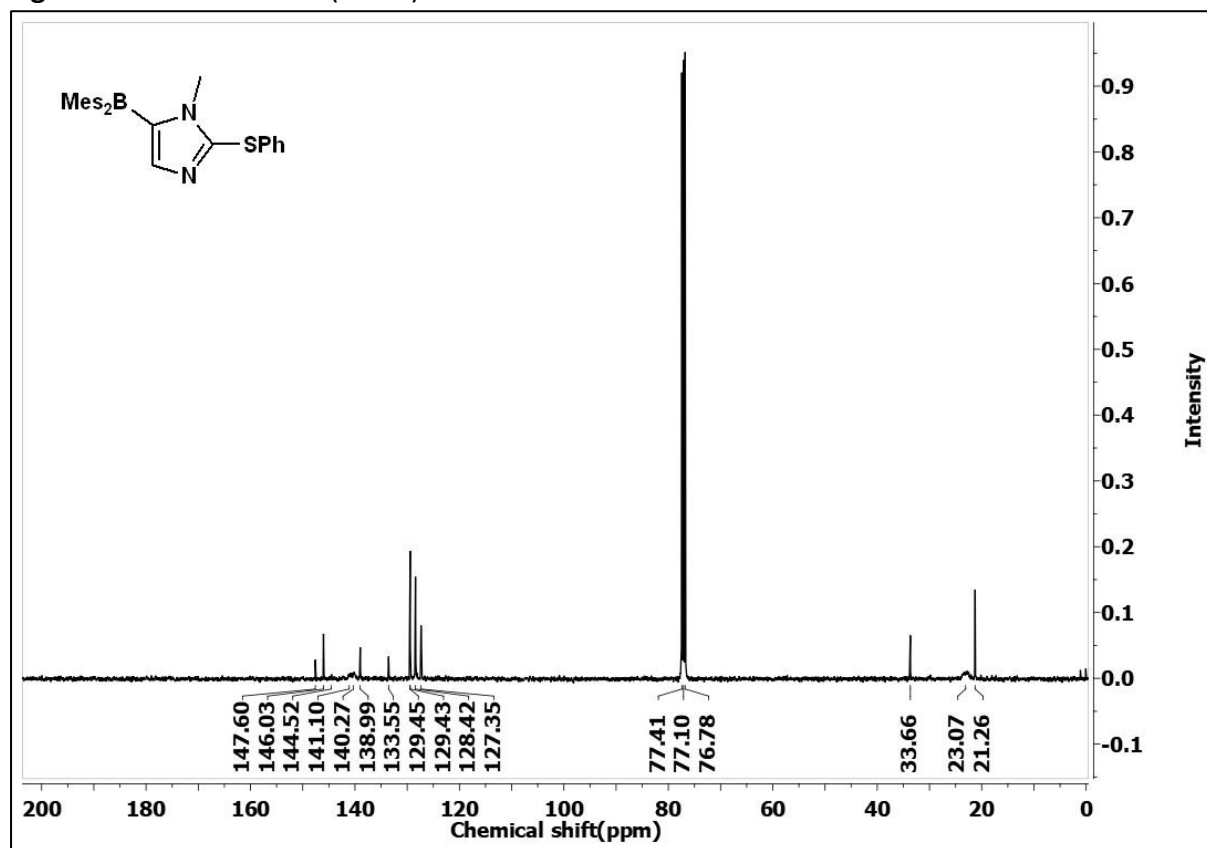



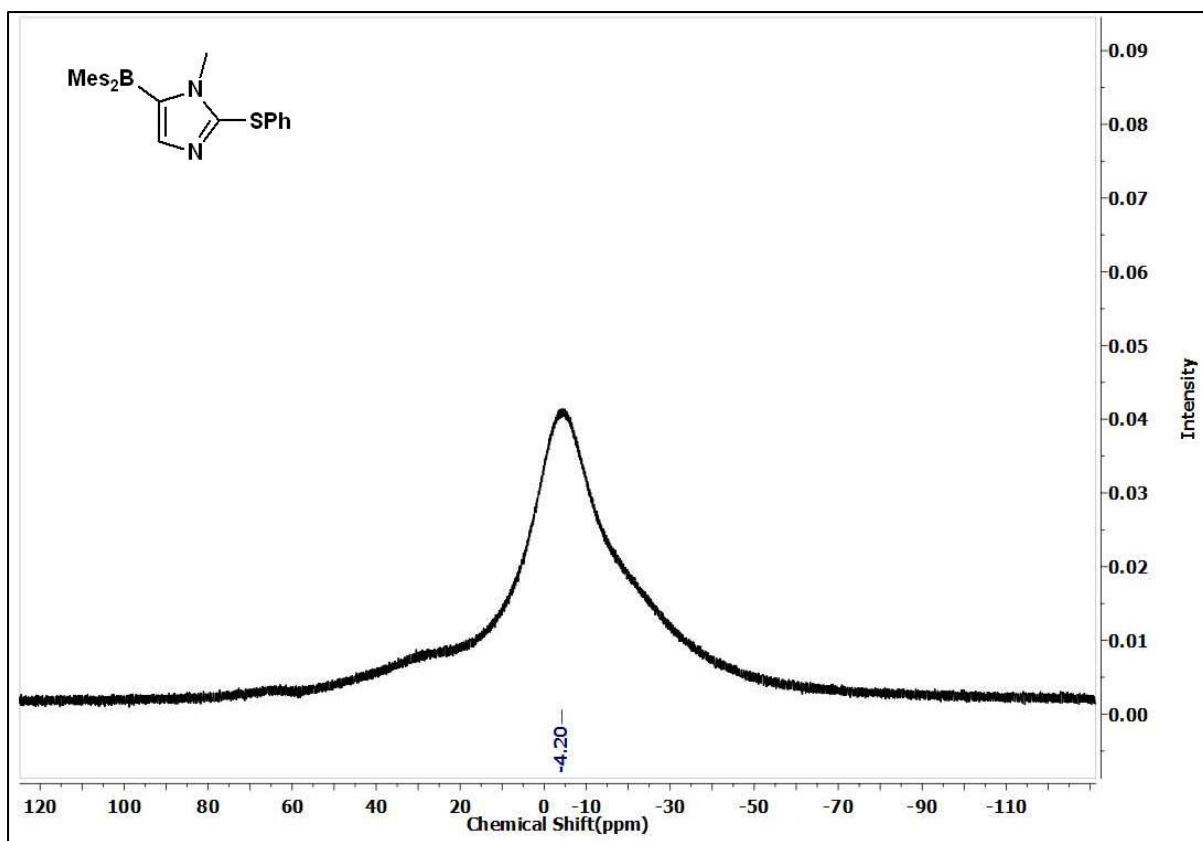

Figure S19:  $^{11}\text{B}$  NMR of 7 ( $\text{CDCl}_3$ )

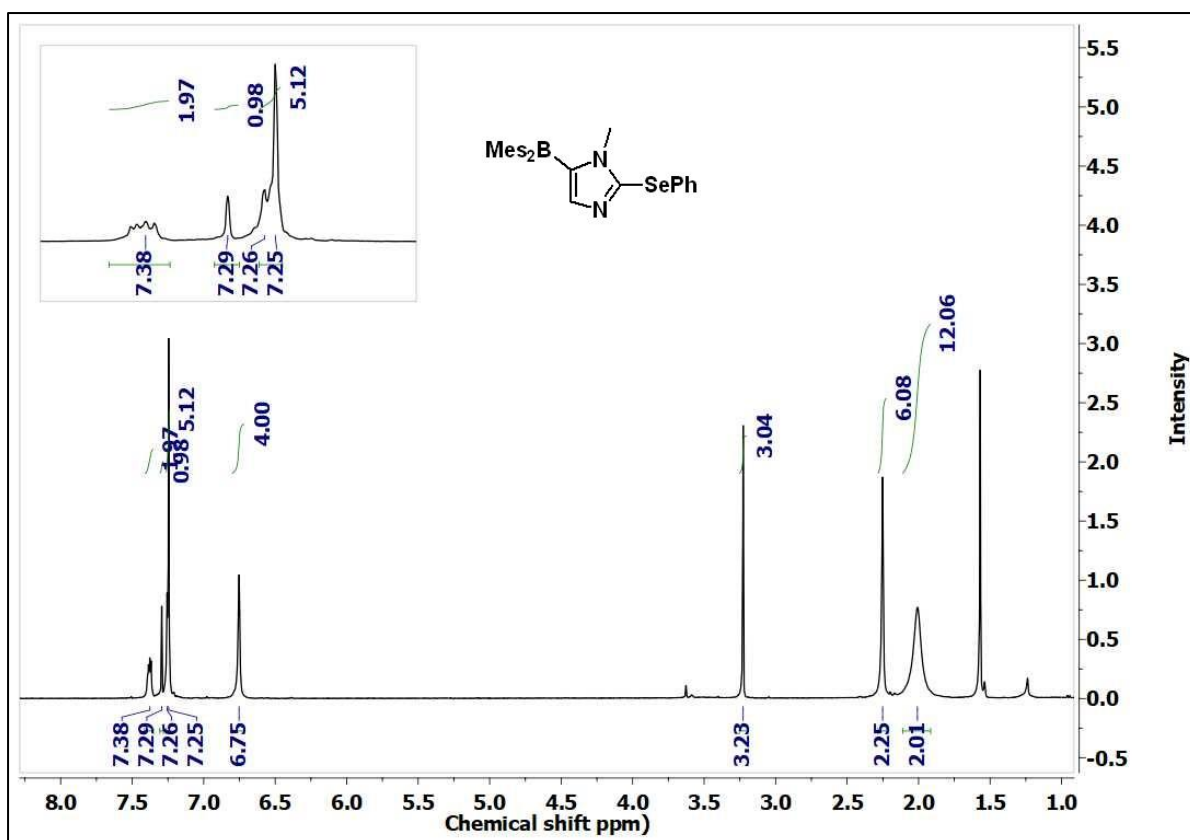

Figure S20:  $^1\text{H}$  NMR of 8 ( $\text{CDCl}_3$ )

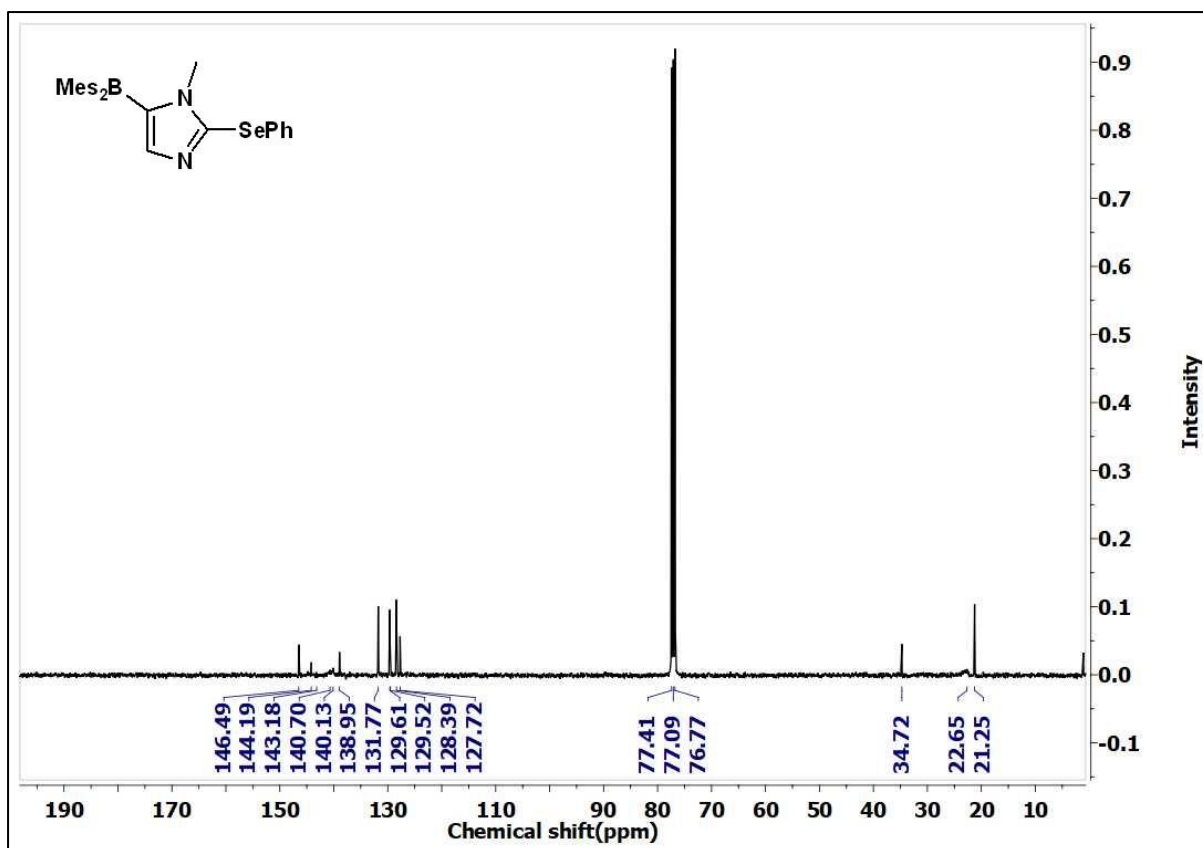

Figure S21: <sup>13</sup>C NMR of 8 (CDCl<sub>3</sub>)

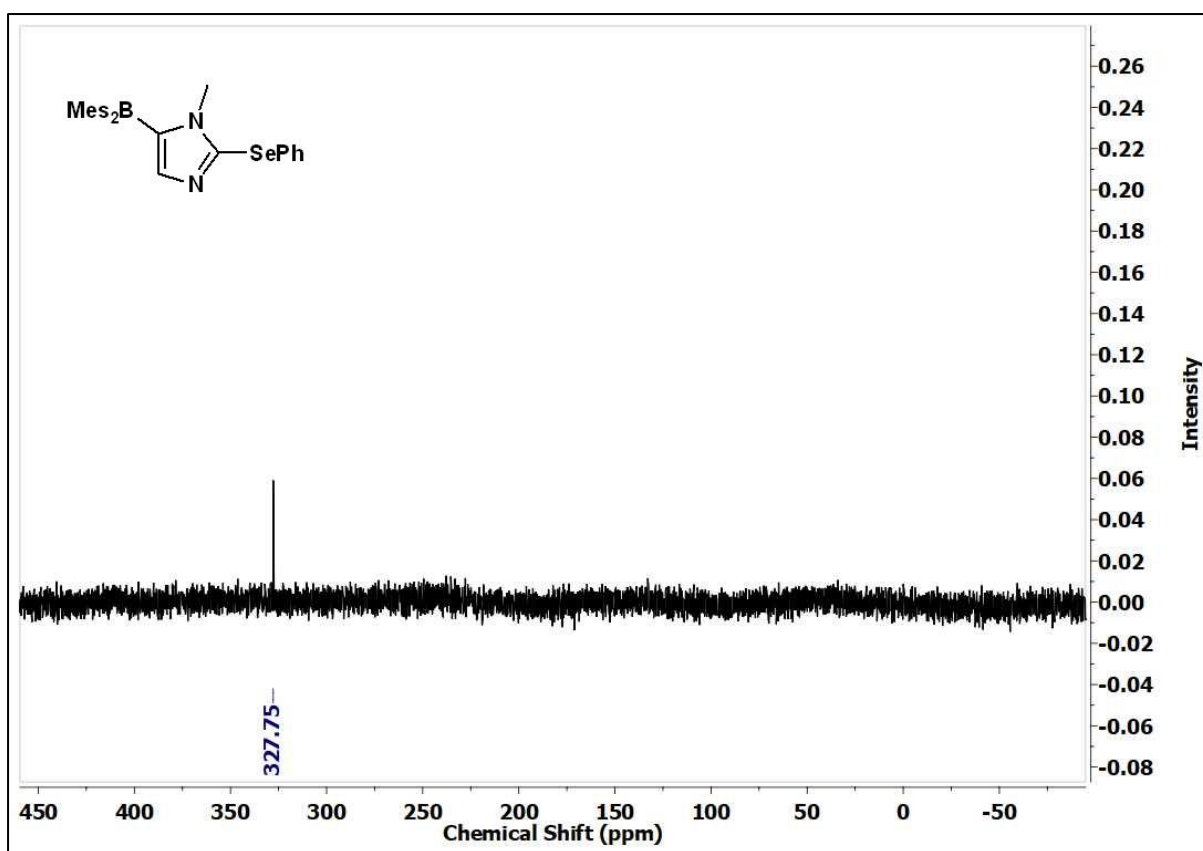

Figure S22: <sup>77</sup>Se NMR of 8 (CDCl<sub>3</sub>)

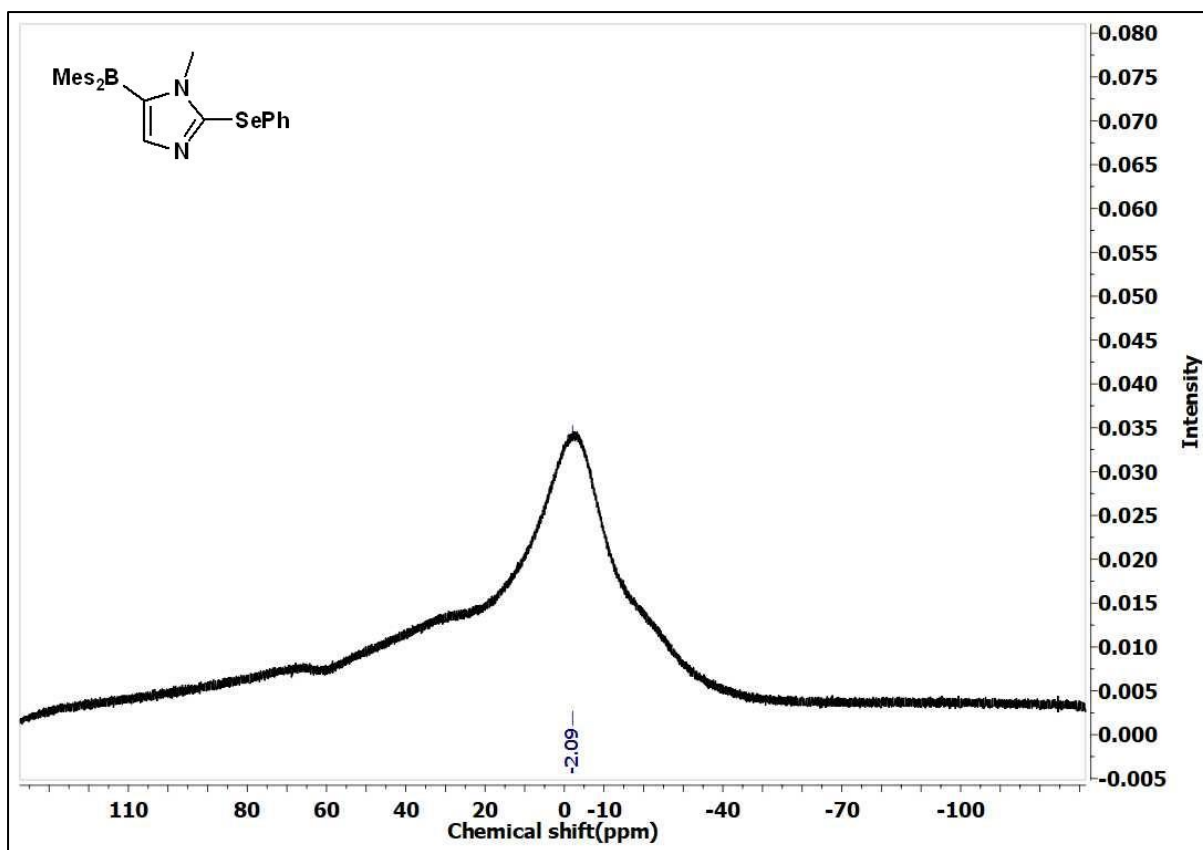

Figure S23:  $^{11}\text{B}$  NMR of **8** ( $\text{CDCl}_3$ )

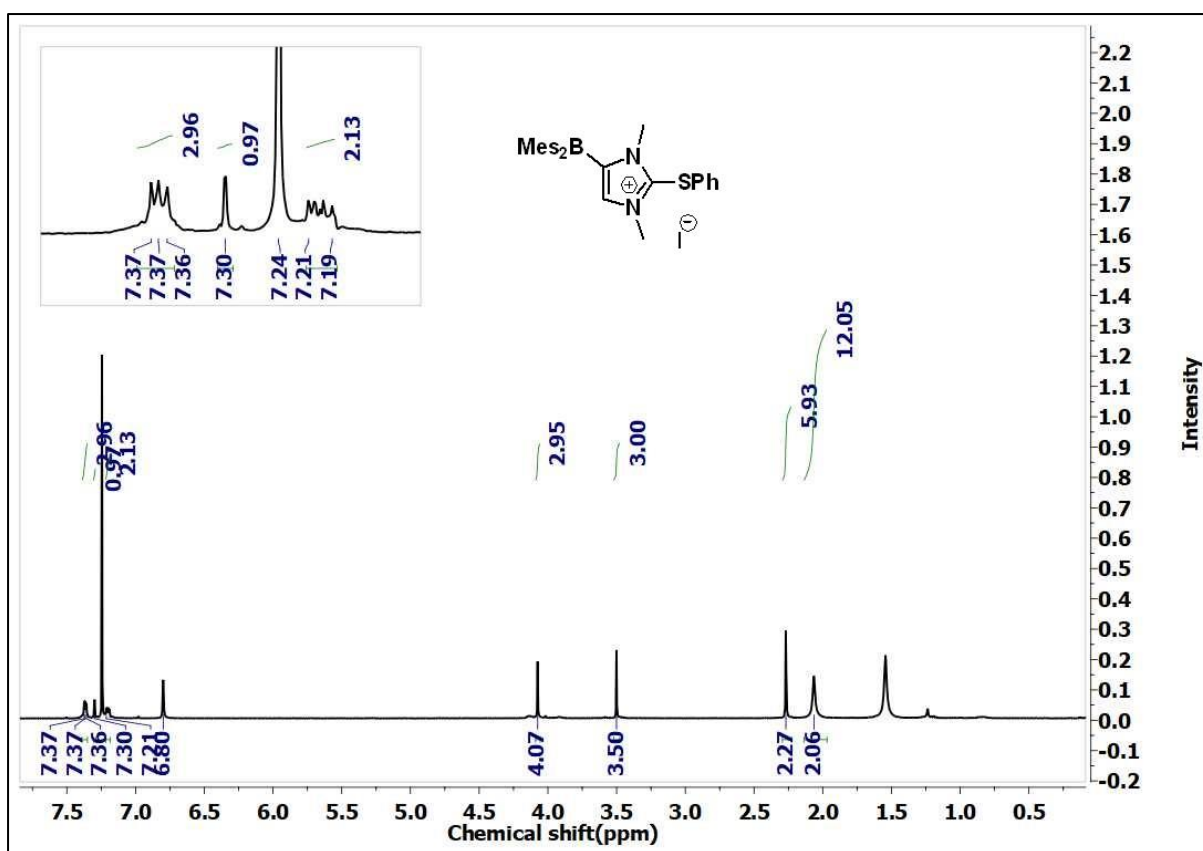

Figure S24:  $^1\text{H}$  NMR of **9** ( $\text{CDCl}_3$ )

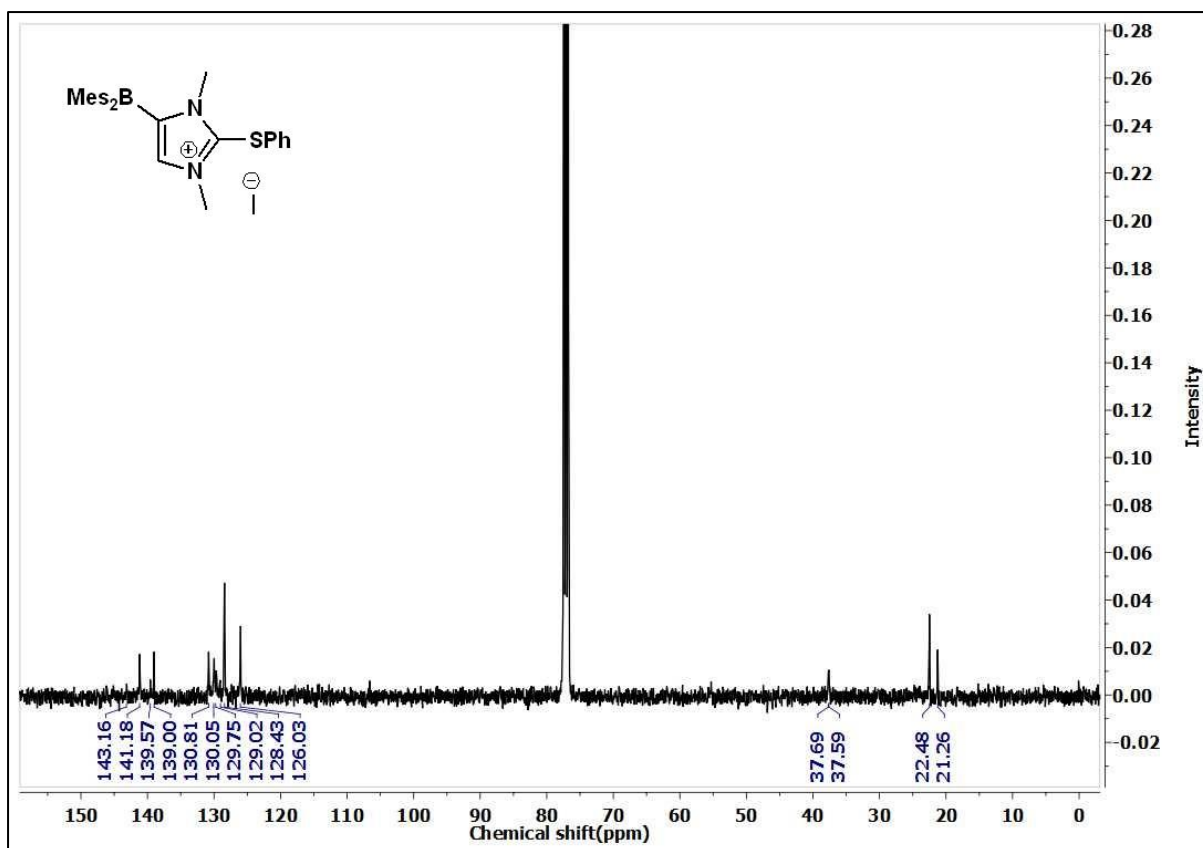

Figure S25:  $^{13}\text{C}$  NMR of 9 ( $\text{CDCl}_3$ )

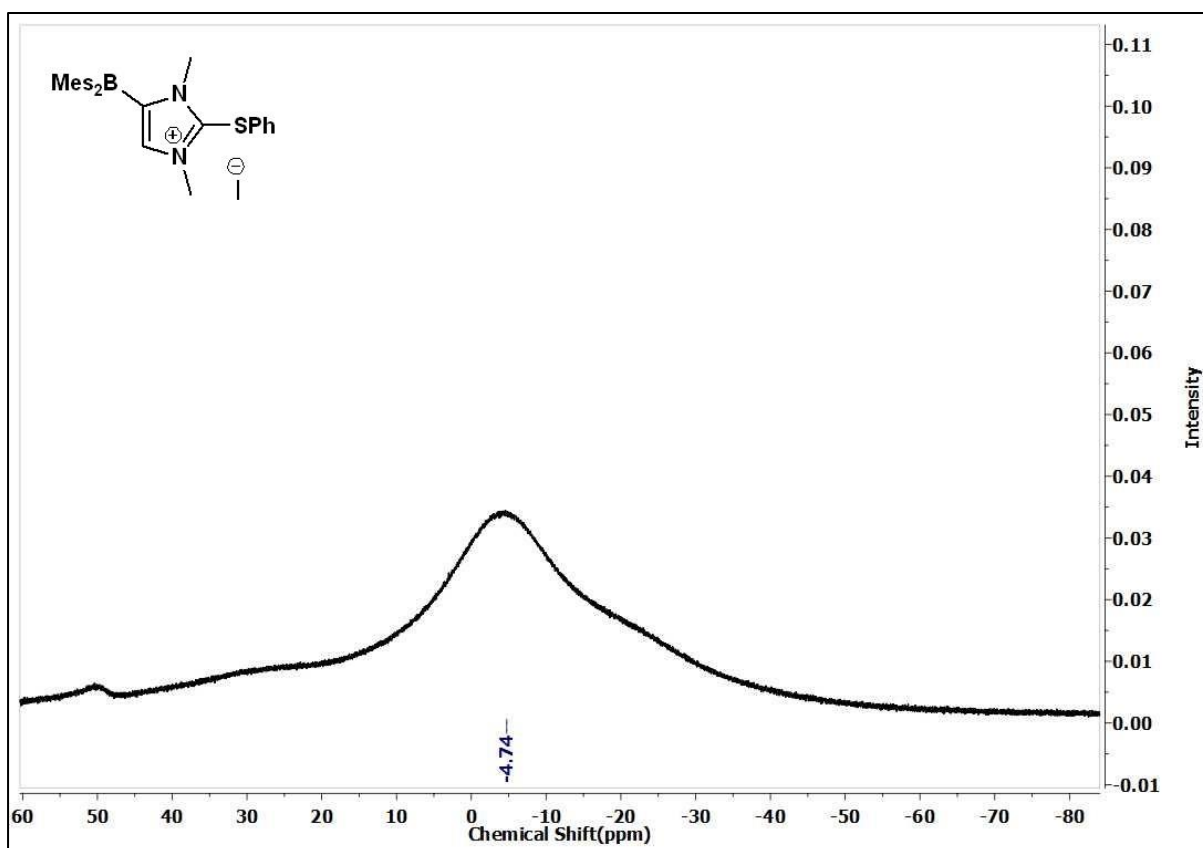

Figure S26:  $^{11}\text{B}$  NMR of 9 ( $\text{CDCl}_3$ )

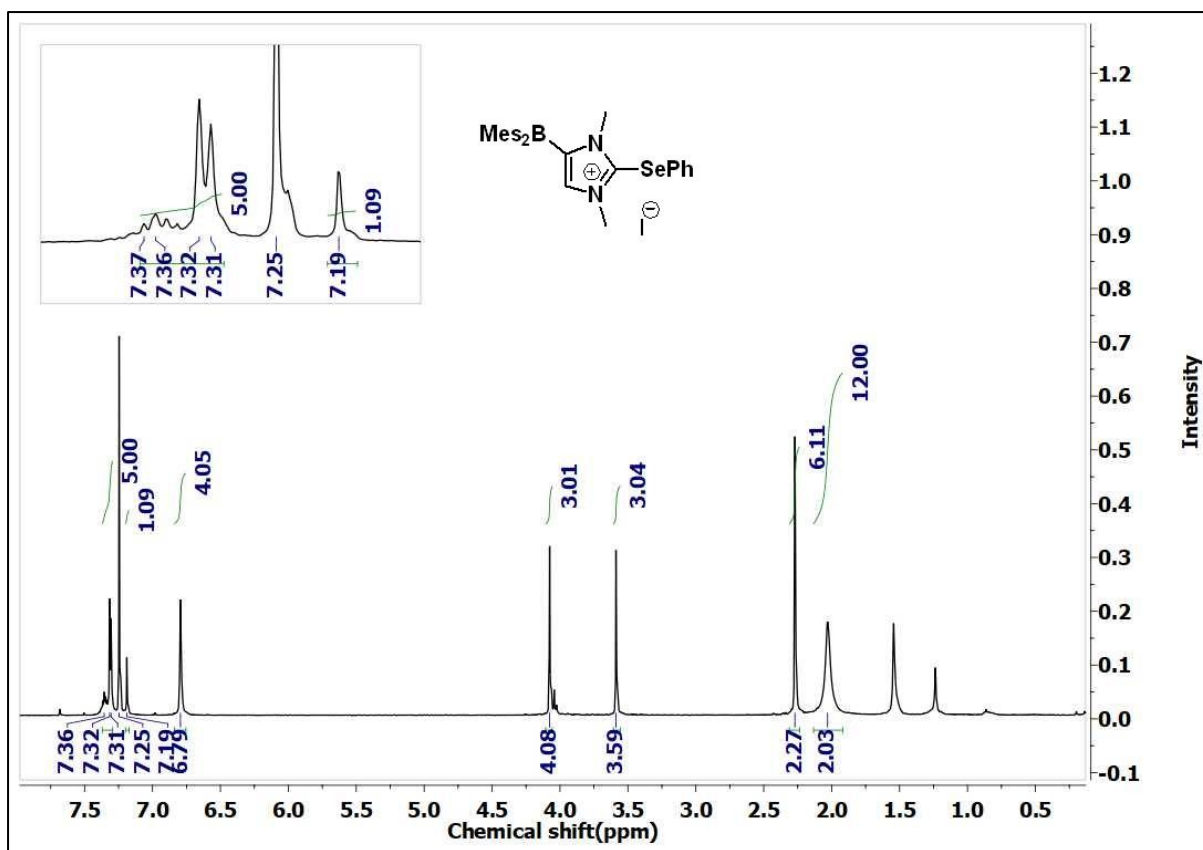

Figure S27:  $^1\text{H}$  NMR of **10** ( $\text{CDCl}_3$ )

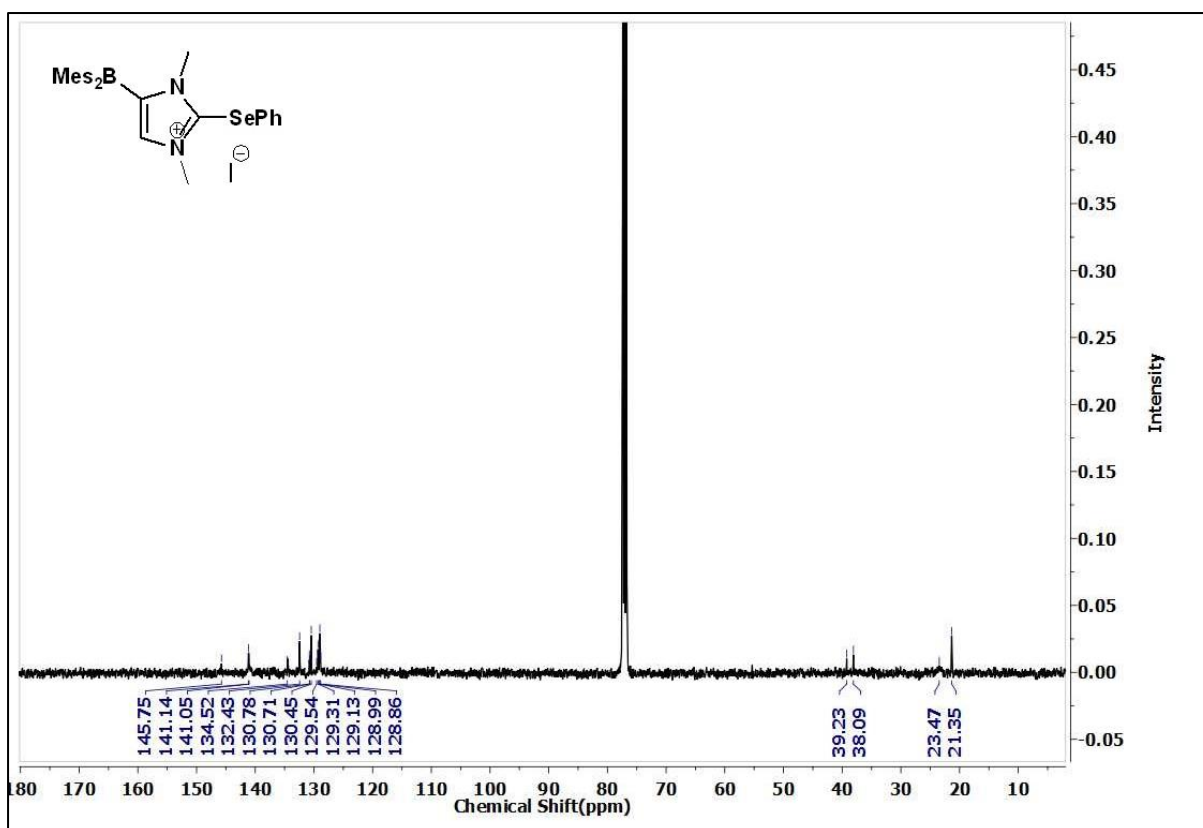

Figure S28:  $^{13}\text{C}$  NMR of **10** ( $\text{CDCl}_3$ )

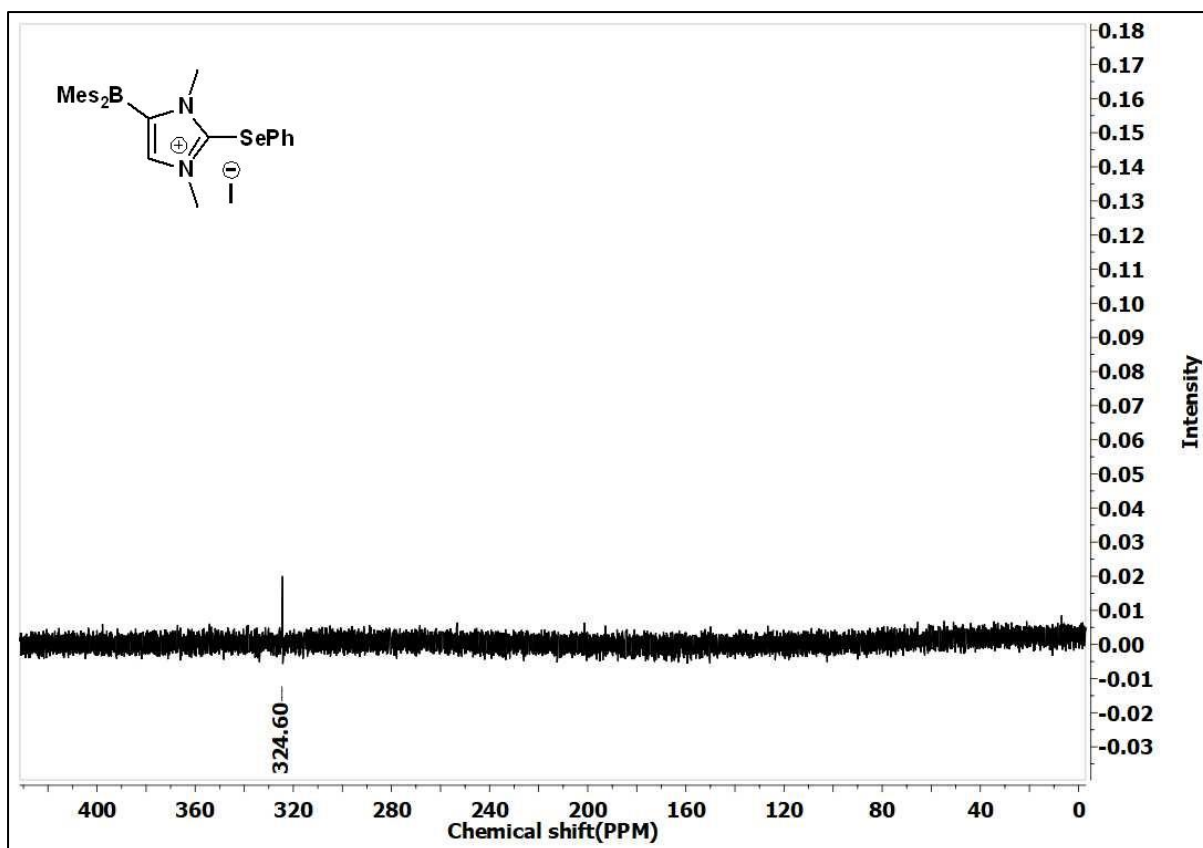

Figure S29:  $^{77}\text{Se}$  NMR of **10** ( $\text{CDCl}_3$ )

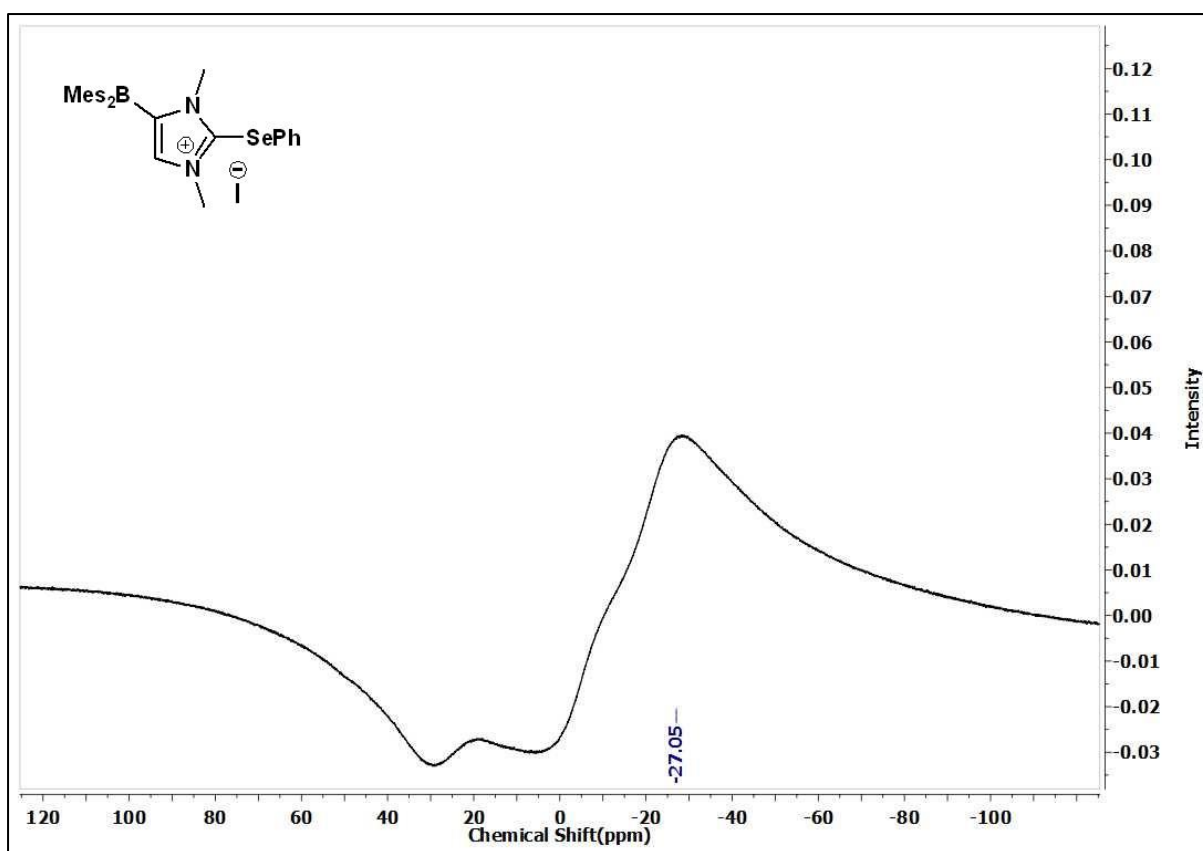

Figure S30:  $^{11}\text{B}$  NMR of **10** ( $\text{CDCl}_3$ )

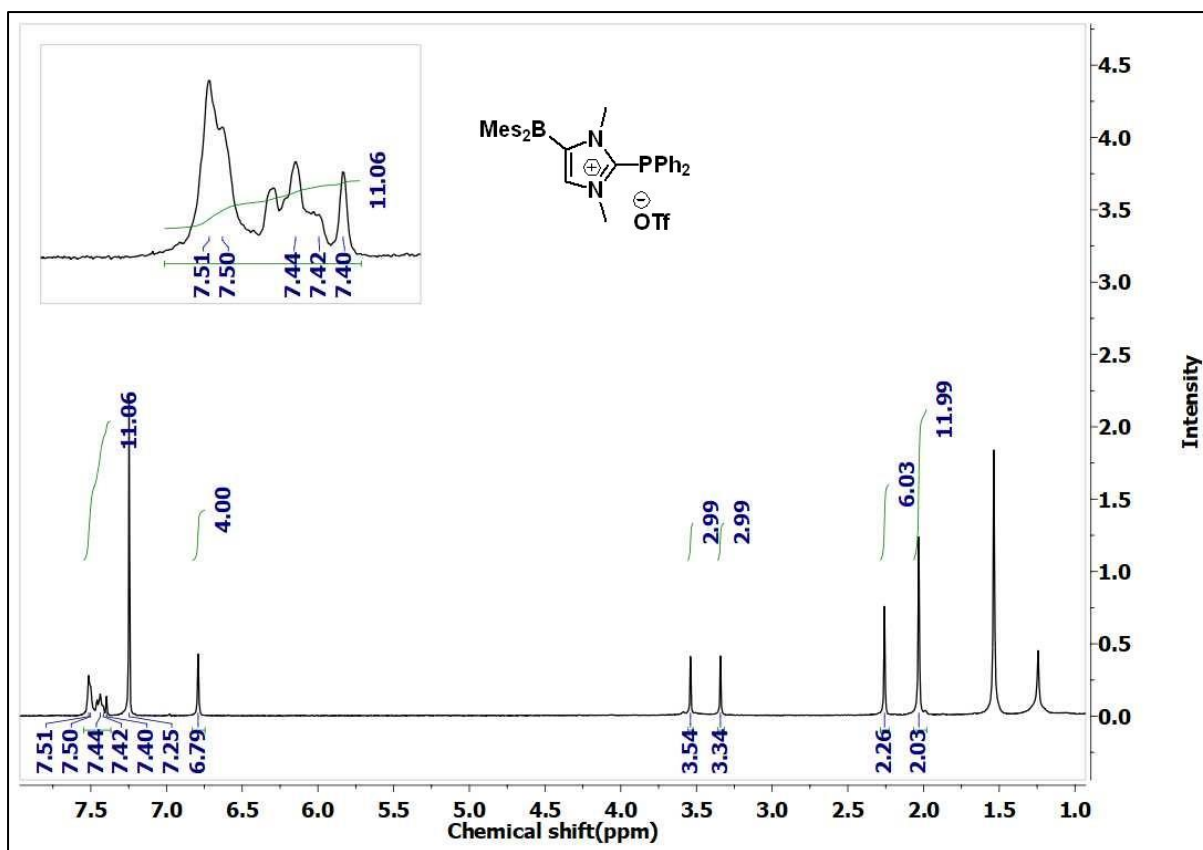

Figure S31:  $^1\text{H}$  NMR of **11** ( $\text{CDCl}_3$ )

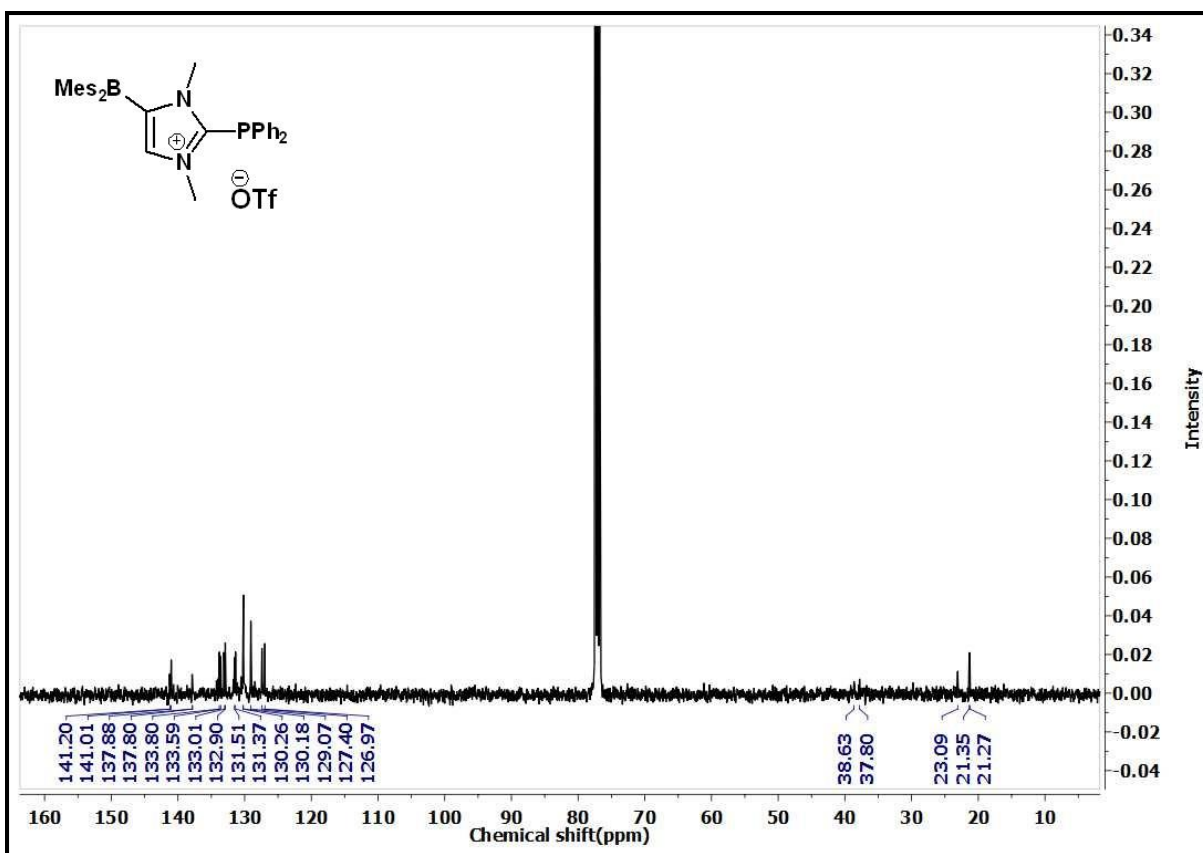

Figure S32:  $^{13}\text{C}$  NMR of **11** ( $\text{CDCl}_3$ )

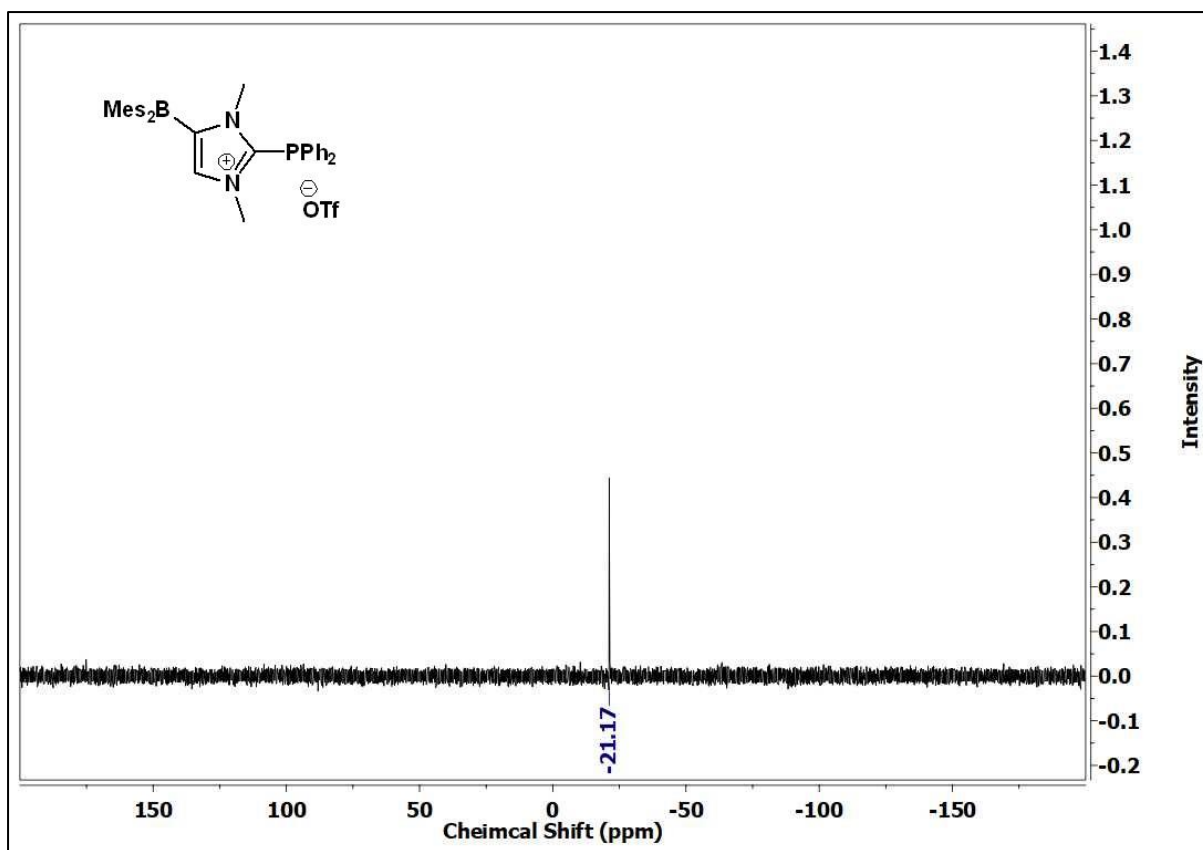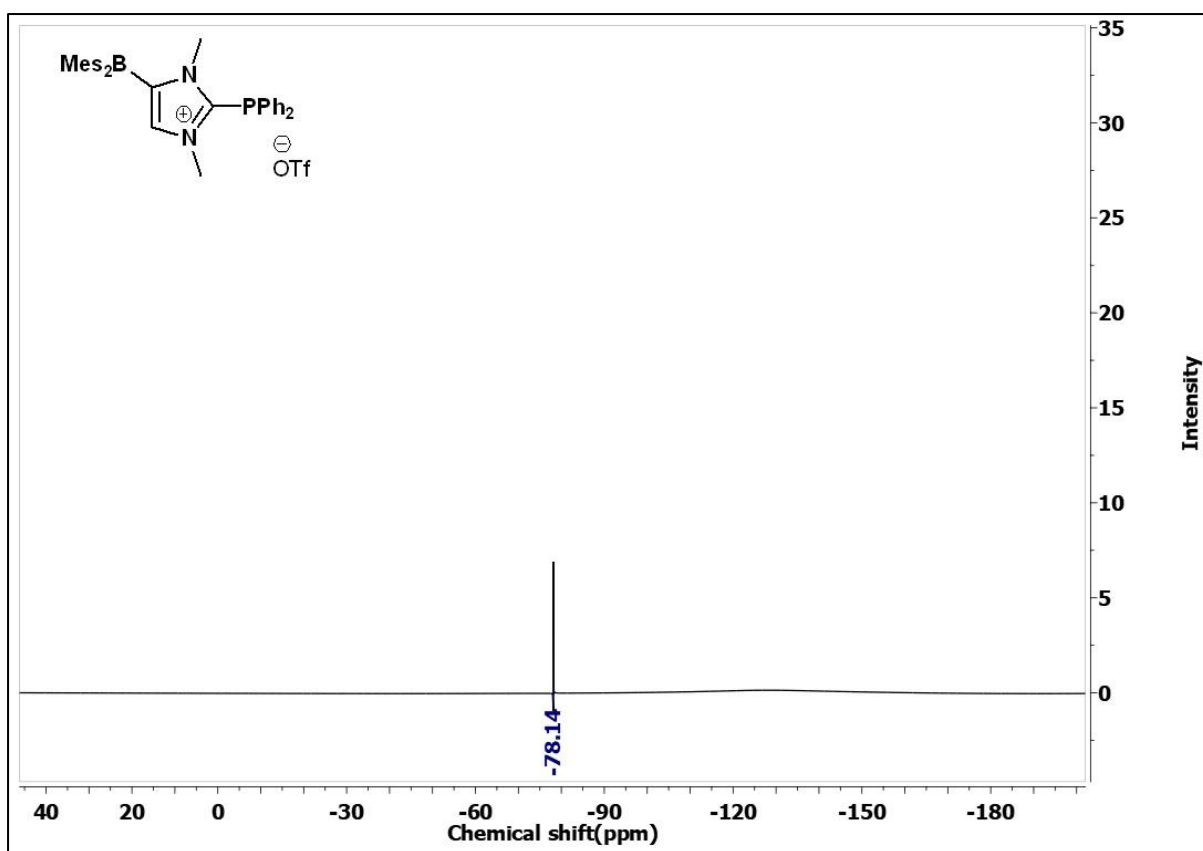



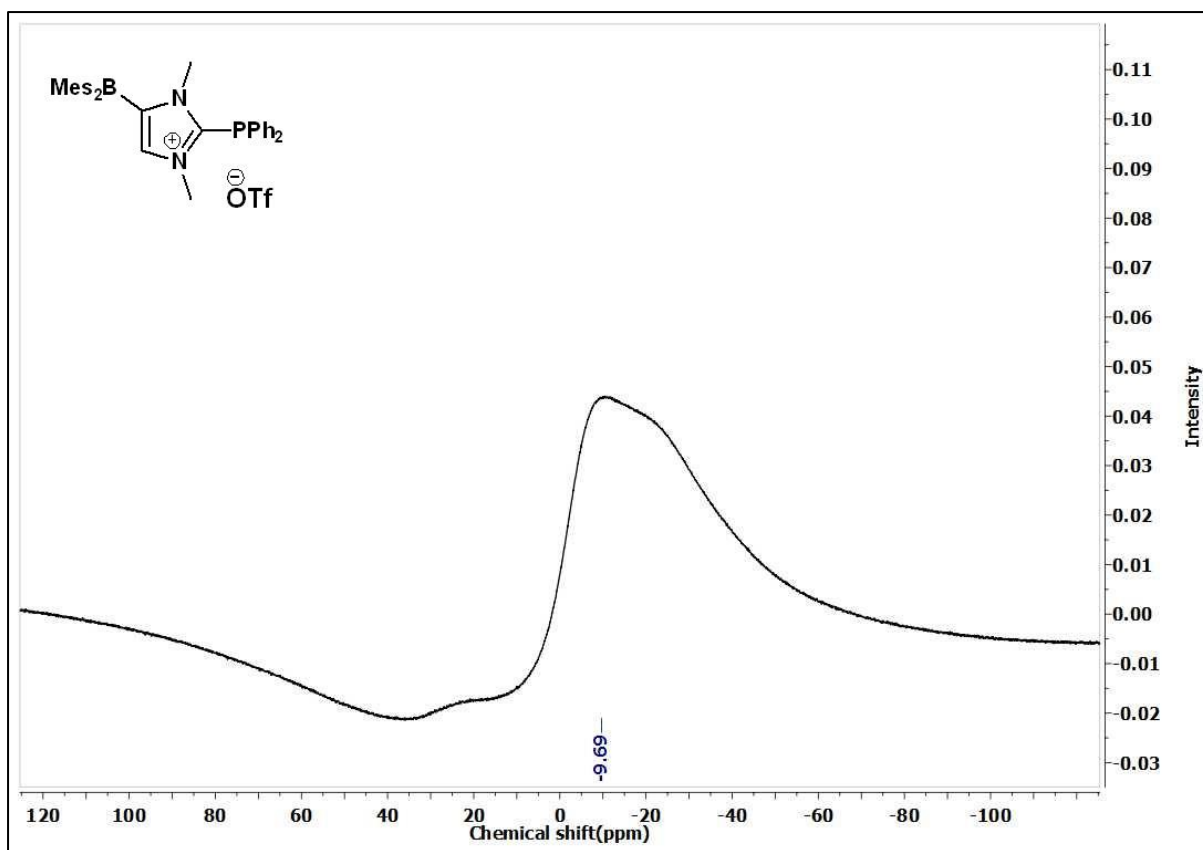

Figure S35:  $^{11}\text{B}$  NMR of **11** ( $\text{CDCl}_3$ )

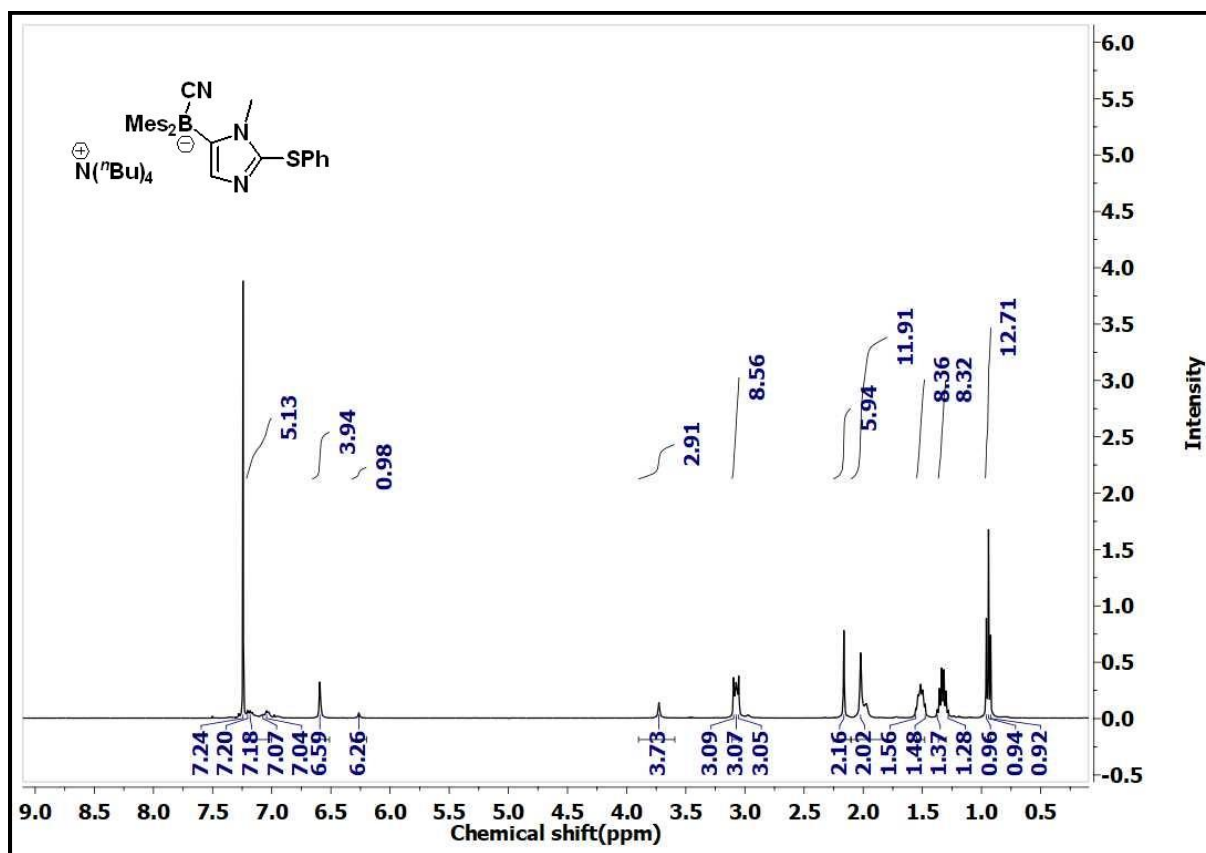

Figure S36:  $^1\text{H}$  NMR of **7-[CN]** ( $\text{CDCl}_3$ )

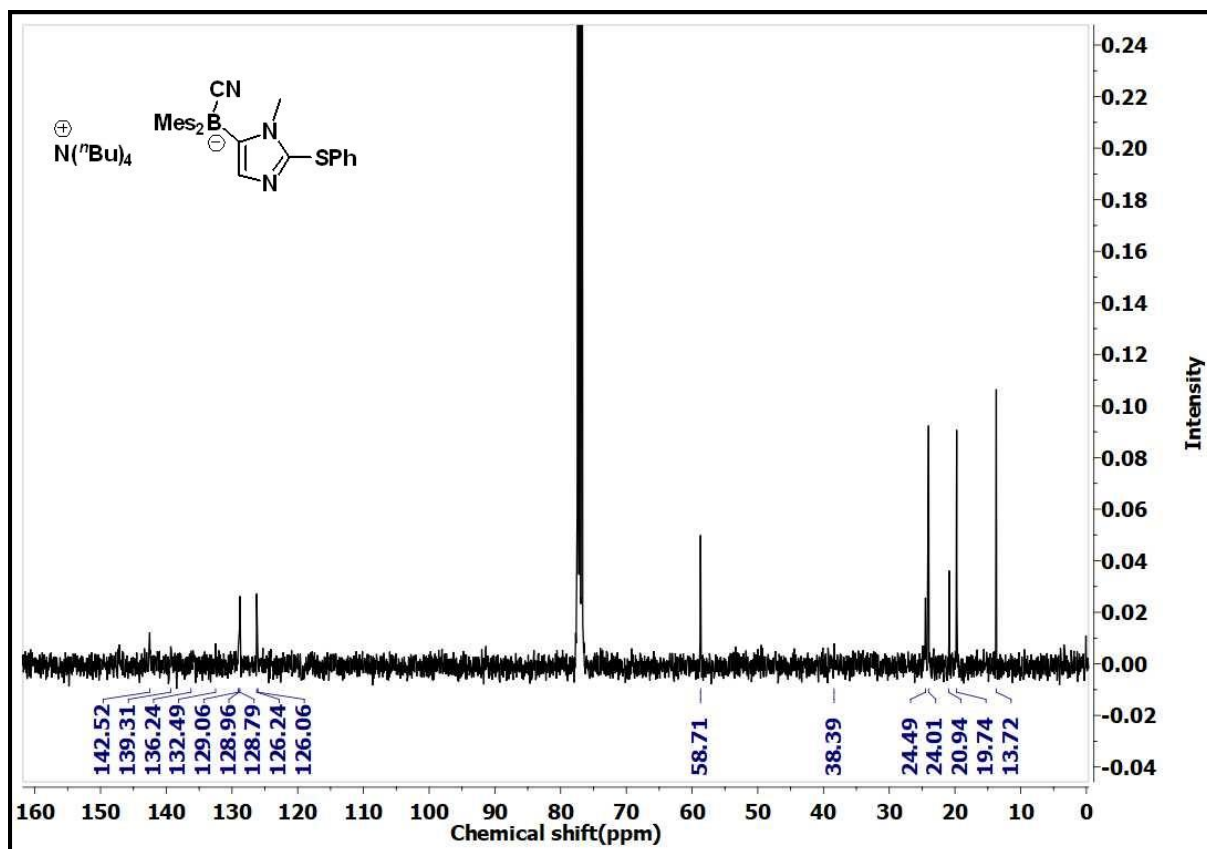

Figure S37:  $^{13}C$  NMR of 7-[CN] ( $CDCl_3$ )

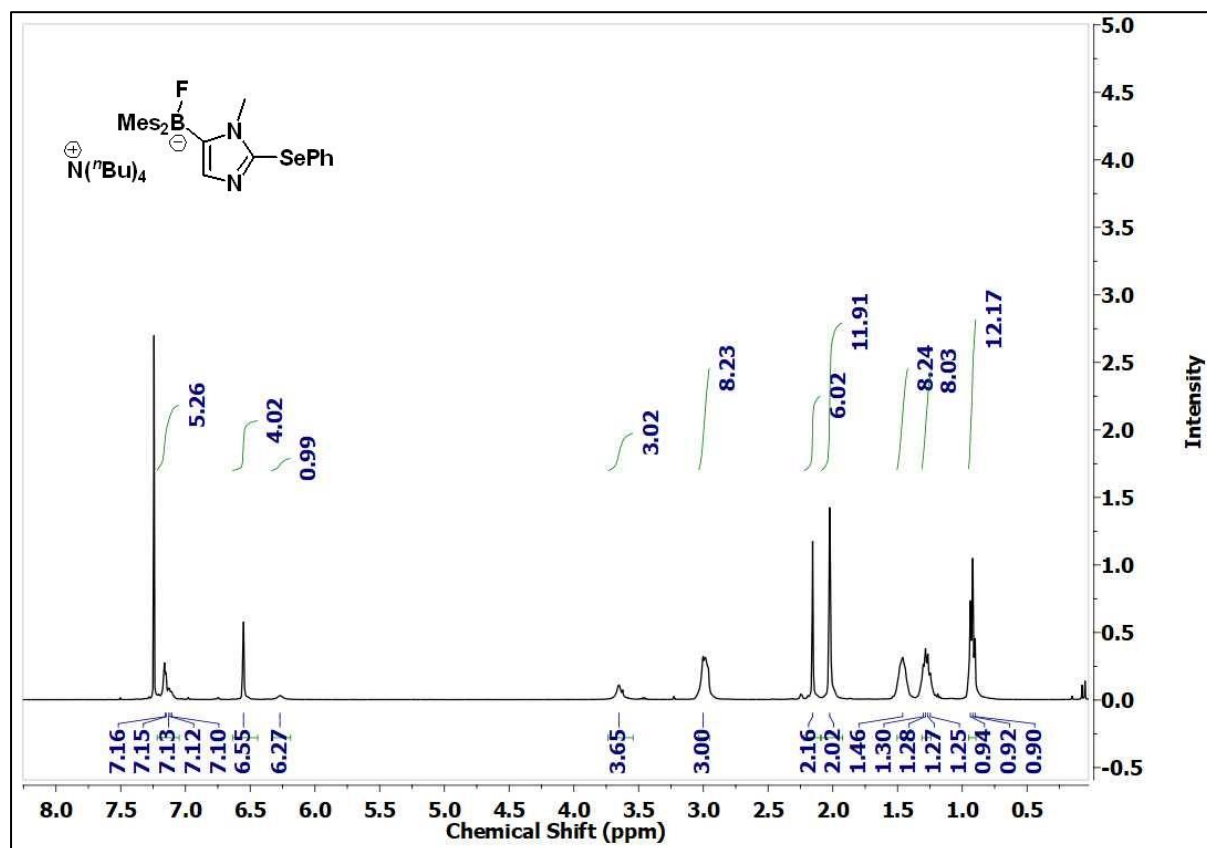

Figure S38:  $^1H$  NMR of 8-[F] ( $CDCl_3$ )

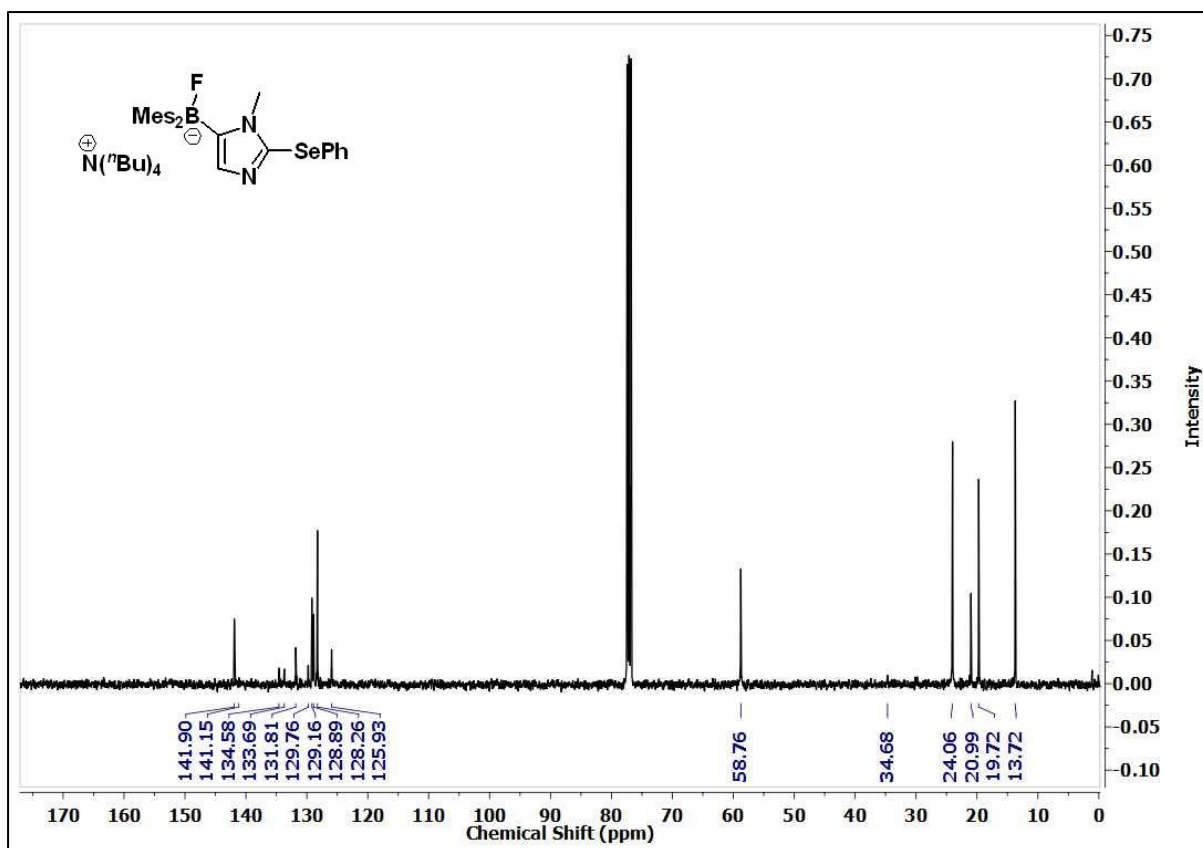

Figure S39: <sup>13</sup>C NMR of 8-[F] (CDCl<sub>3</sub>)

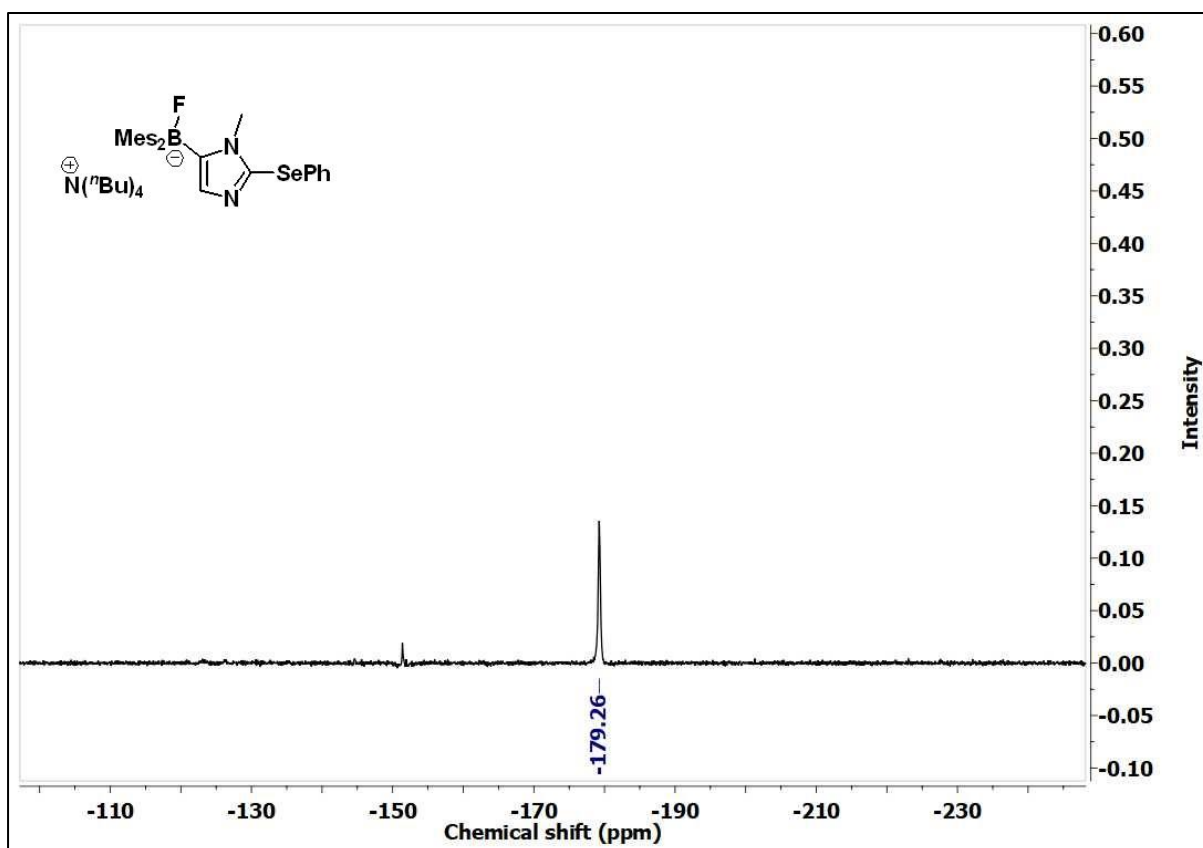

Figure S40: <sup>19</sup>F NMR of 8-[F] (CDCl<sub>3</sub>)

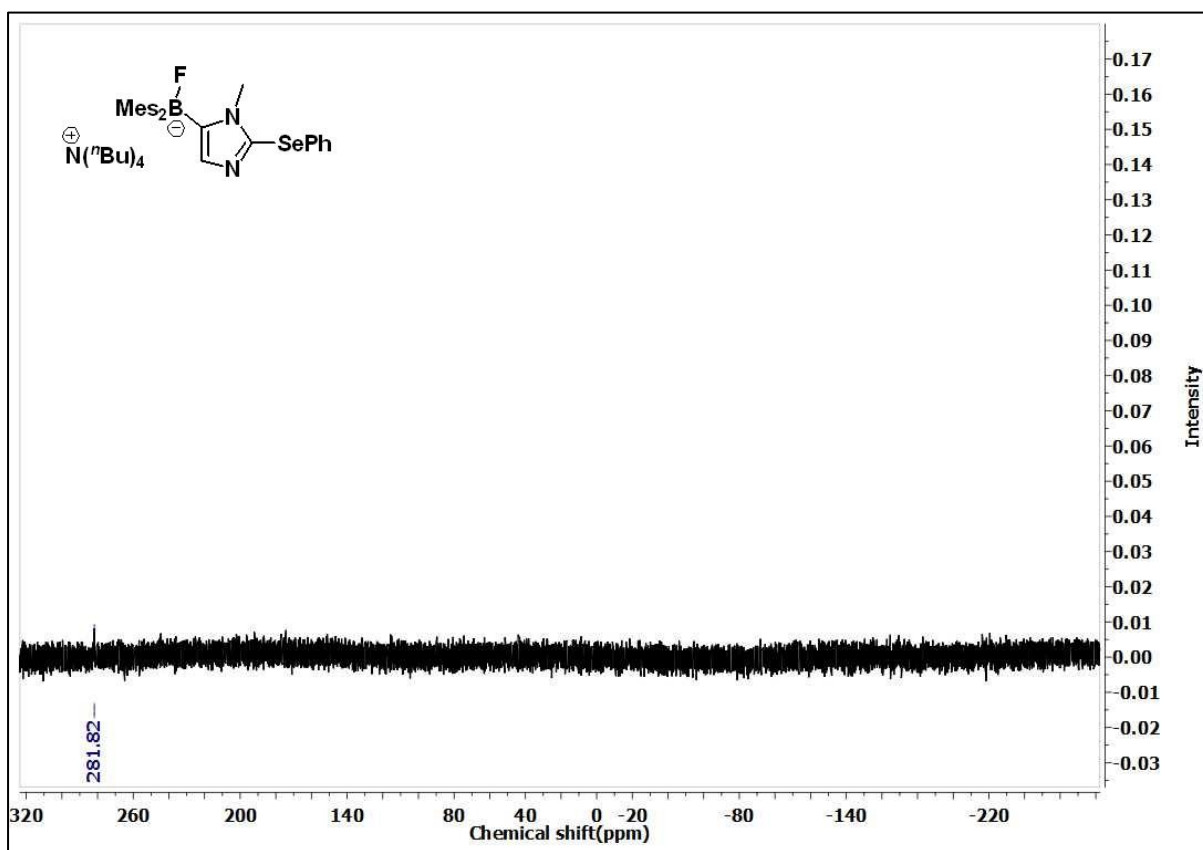

Figure S41: <sup>77</sup>Se NMR of 8-[F] (CDCl<sub>3</sub>)

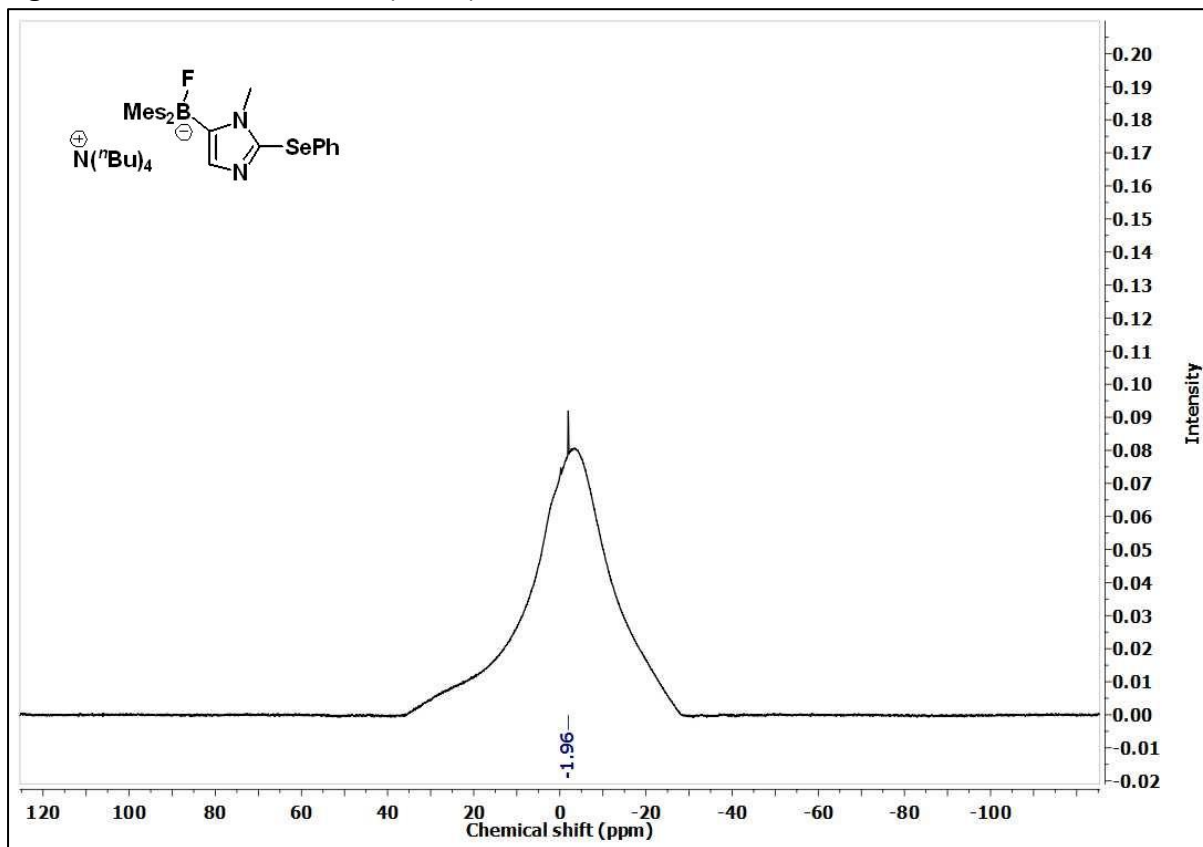

Figure S42: <sup>11</sup>B NMR of 8-[F] (CDCl<sub>3</sub>).

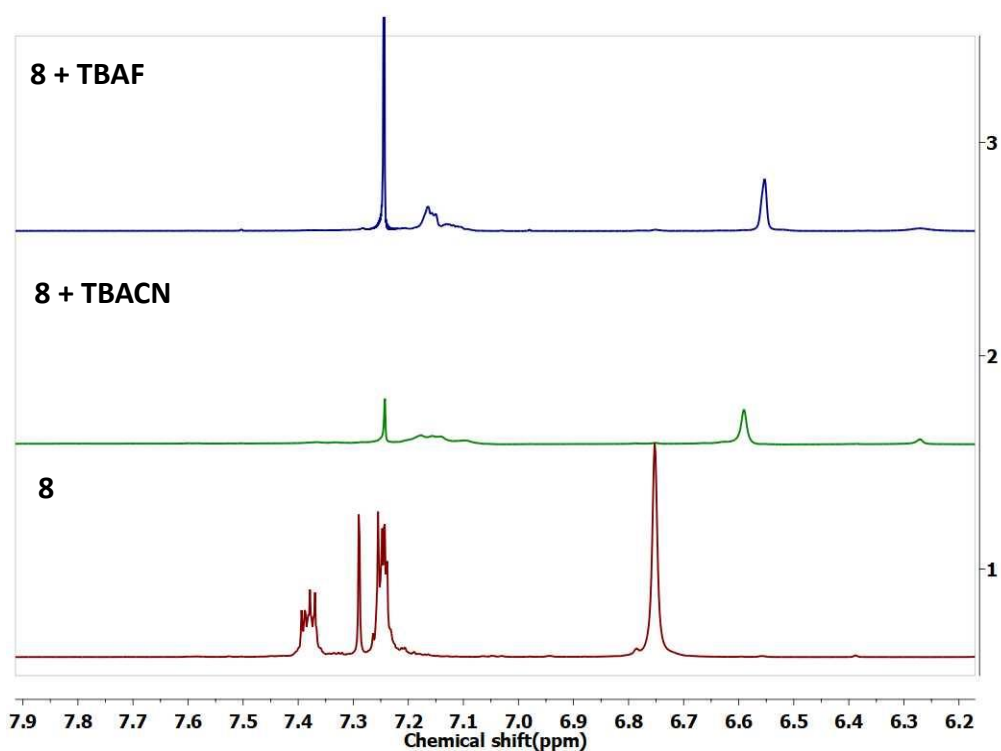

**Figure S43:** Partial  $^1\text{H}$ -NMR spectra of (**8**) in the aromatic region upon addition of TBAF and TBACN (1.0 equiv.) in  $\text{CDCl}_3$  at 400 MHz.

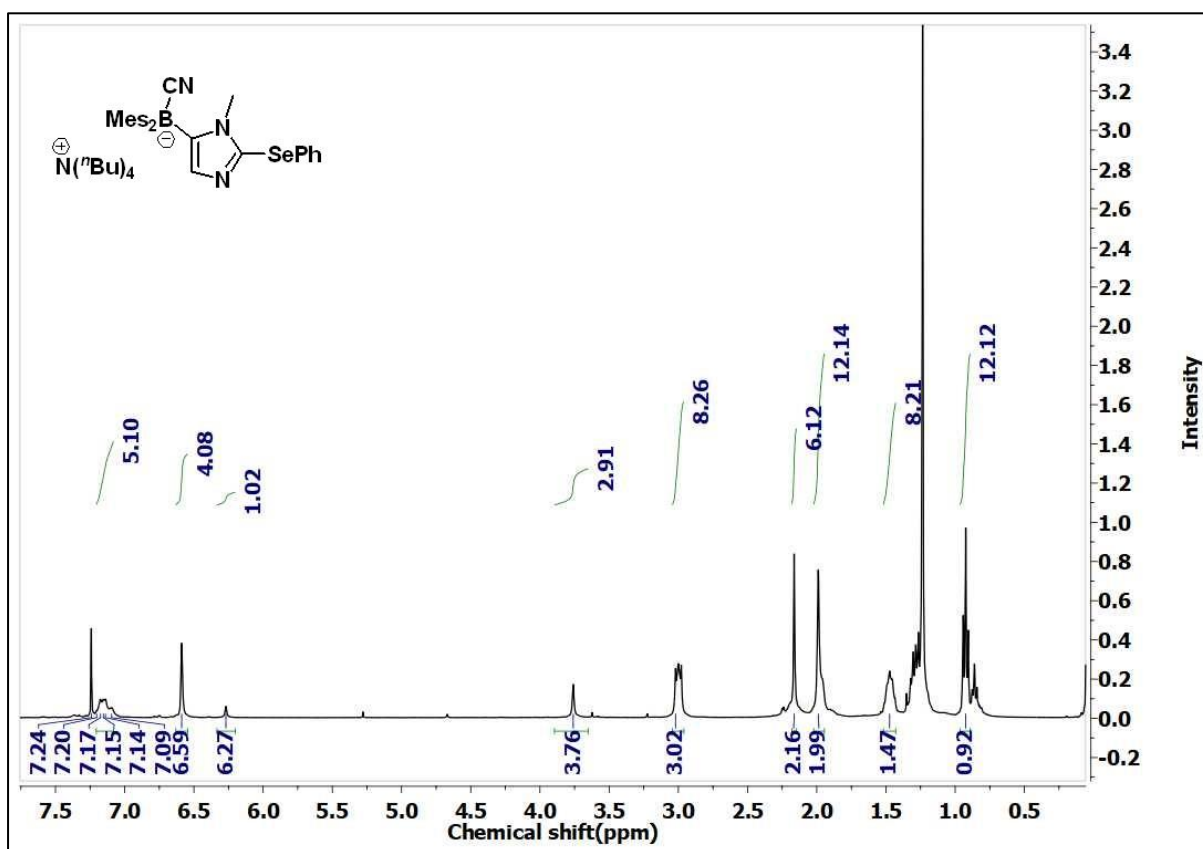

**Figure S44:**  $^1\text{H}$  NMR of **8**-[CN] ( $\text{CDCl}_3$ )

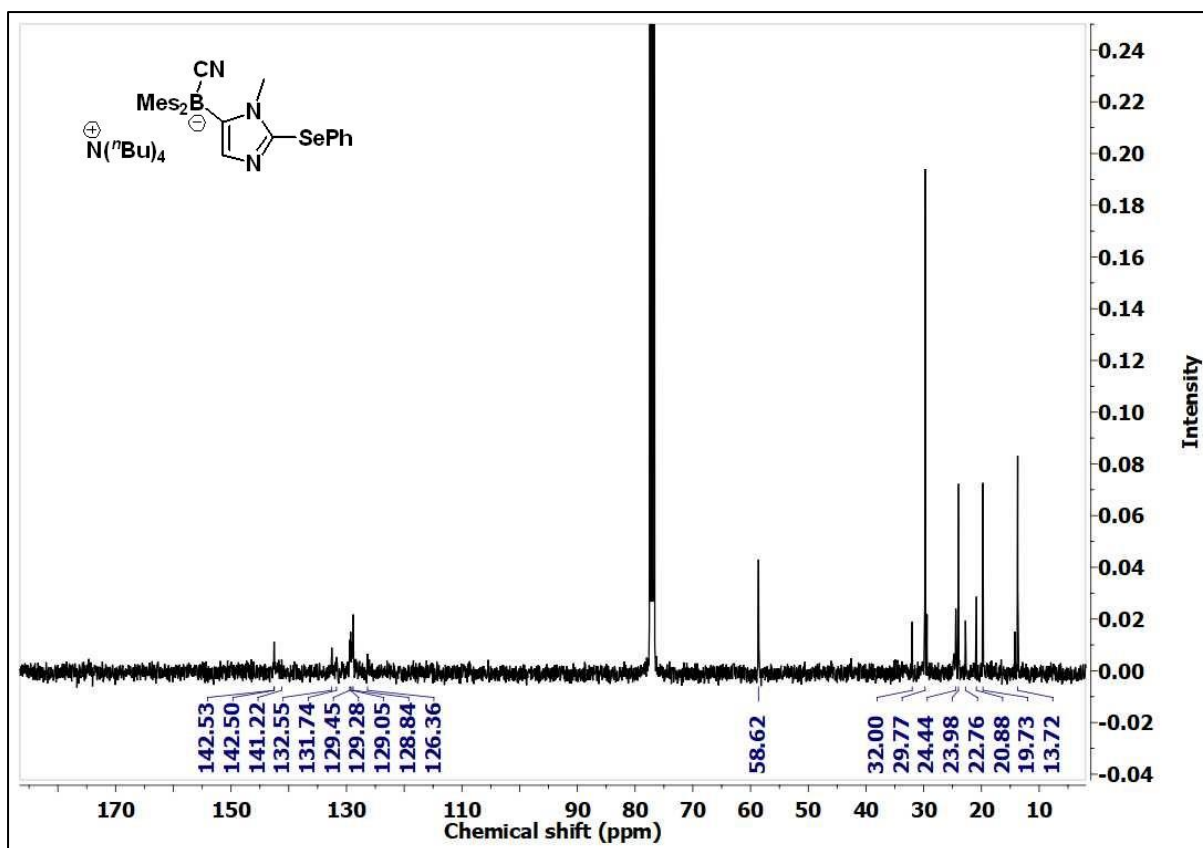

Figure S45:  $^{13}\text{C}$  NMR of 8-[CN] ( $\text{CDCl}_3$ )

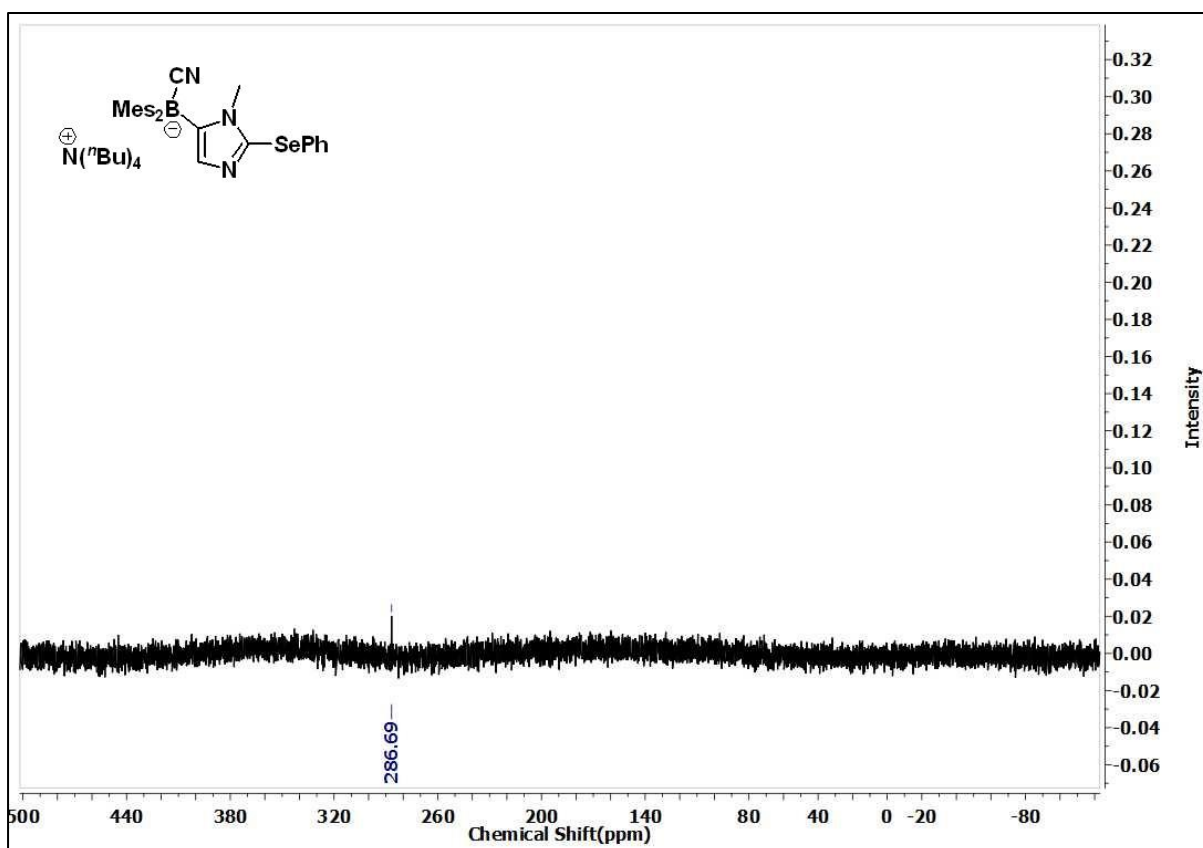

Figure S46:  $^{77}\text{Se}$  NMR of 8-[CN] ( $\text{CDCl}_3$ )

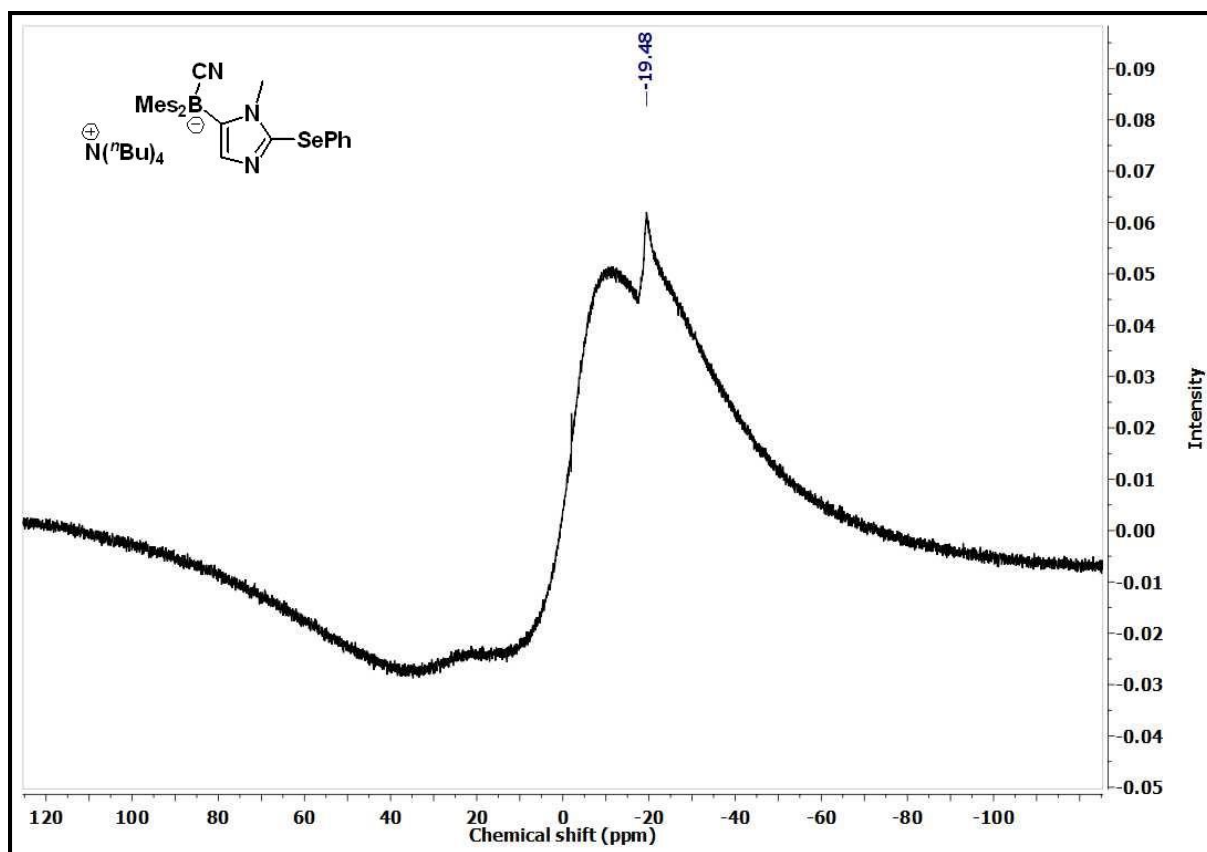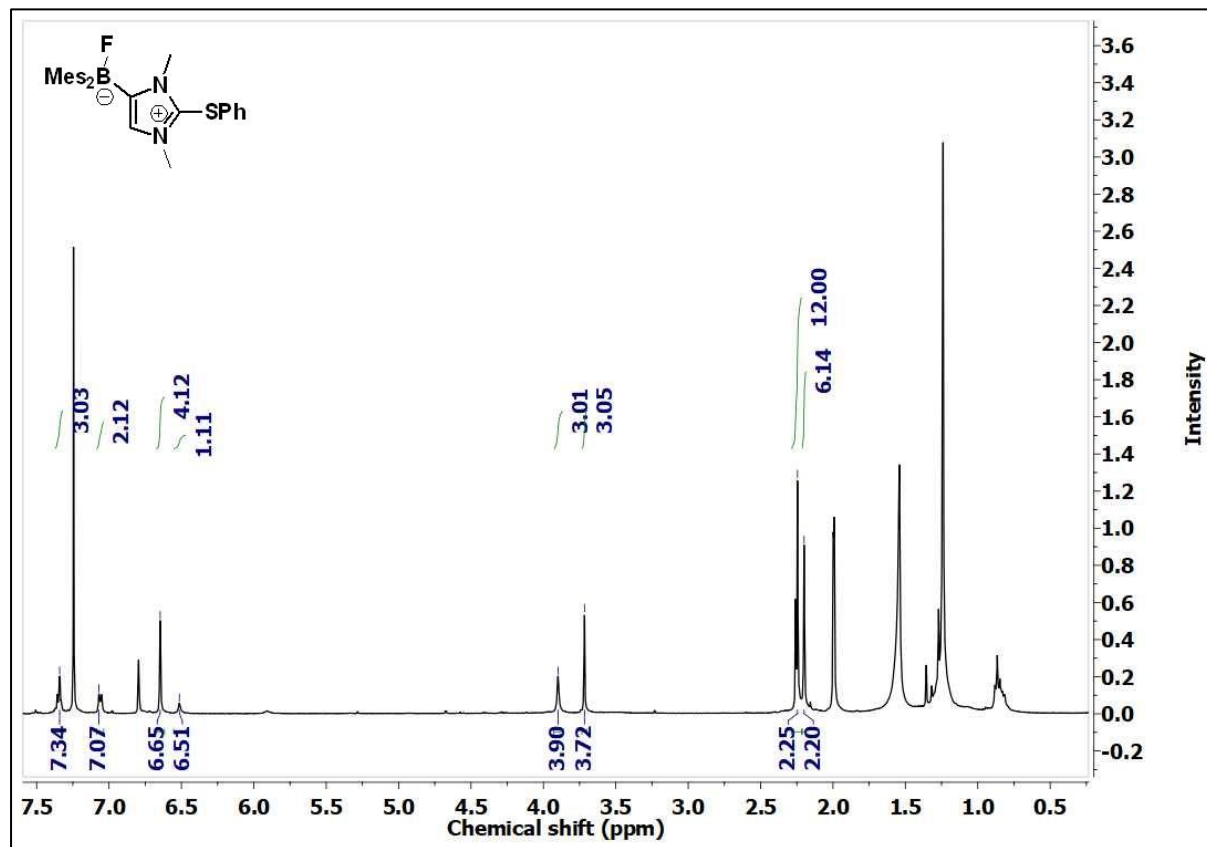

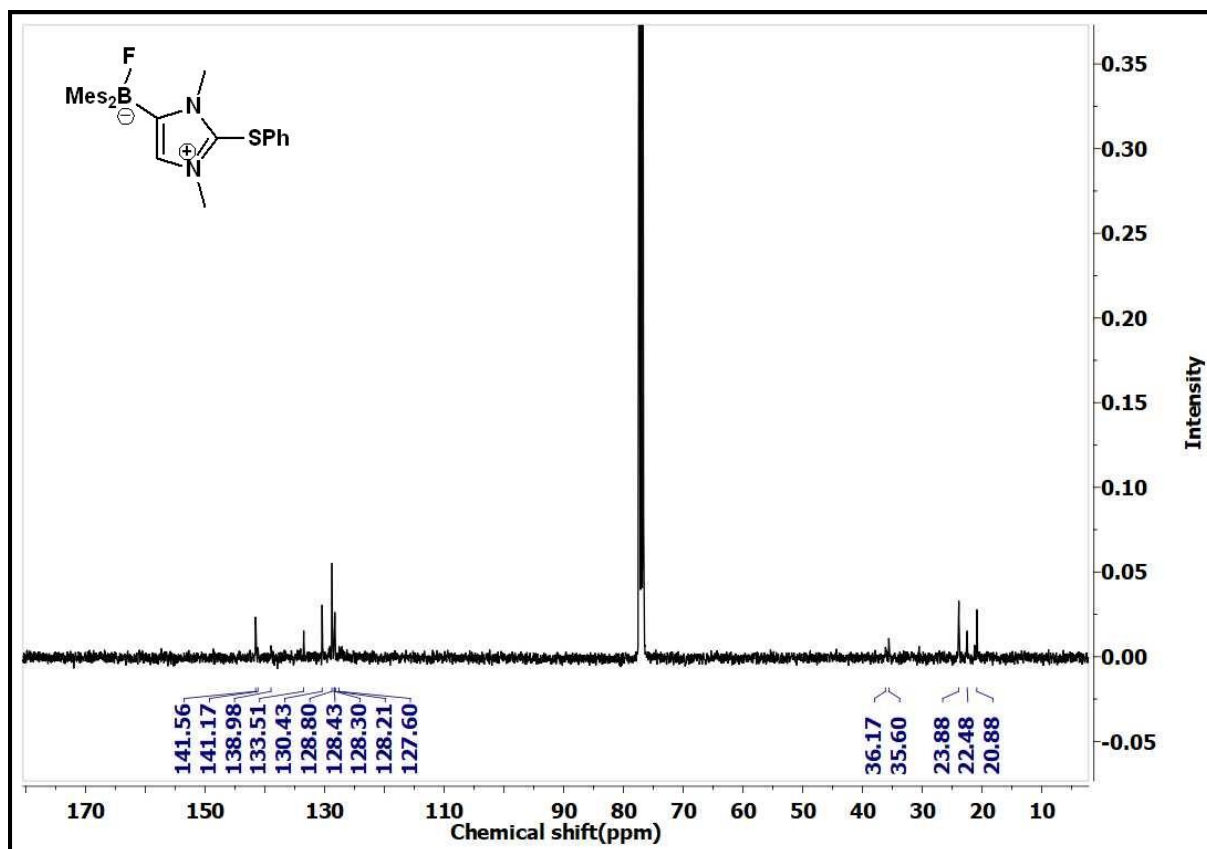

Figure S49: <sup>13</sup>C NMR of 9-[F] (CDCl<sub>3</sub>)

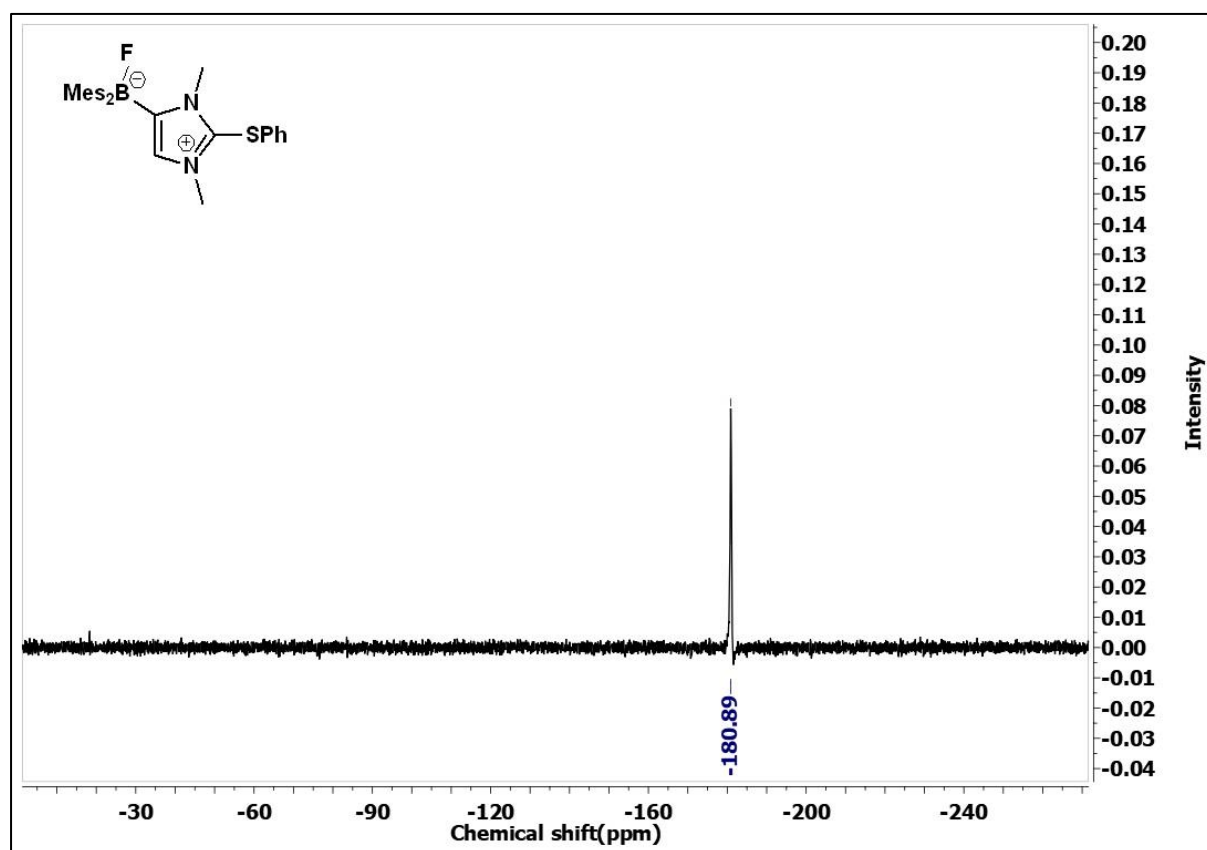

Figure S50: <sup>19</sup>F NMR of 9-[F] (CDCl<sub>3</sub>)



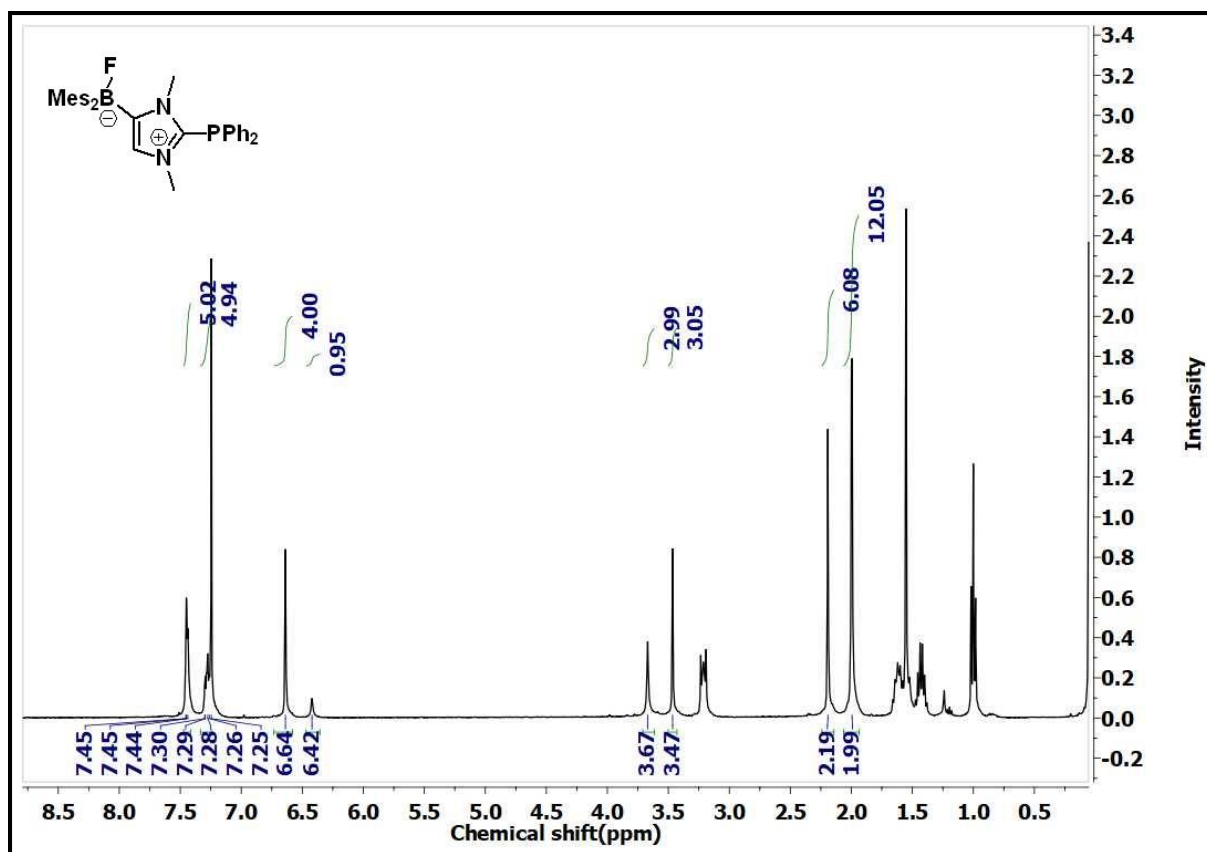

Figure S51:  $^1\text{H}$  NMR of 11-[F] ( $\text{CDCl}_3$ )

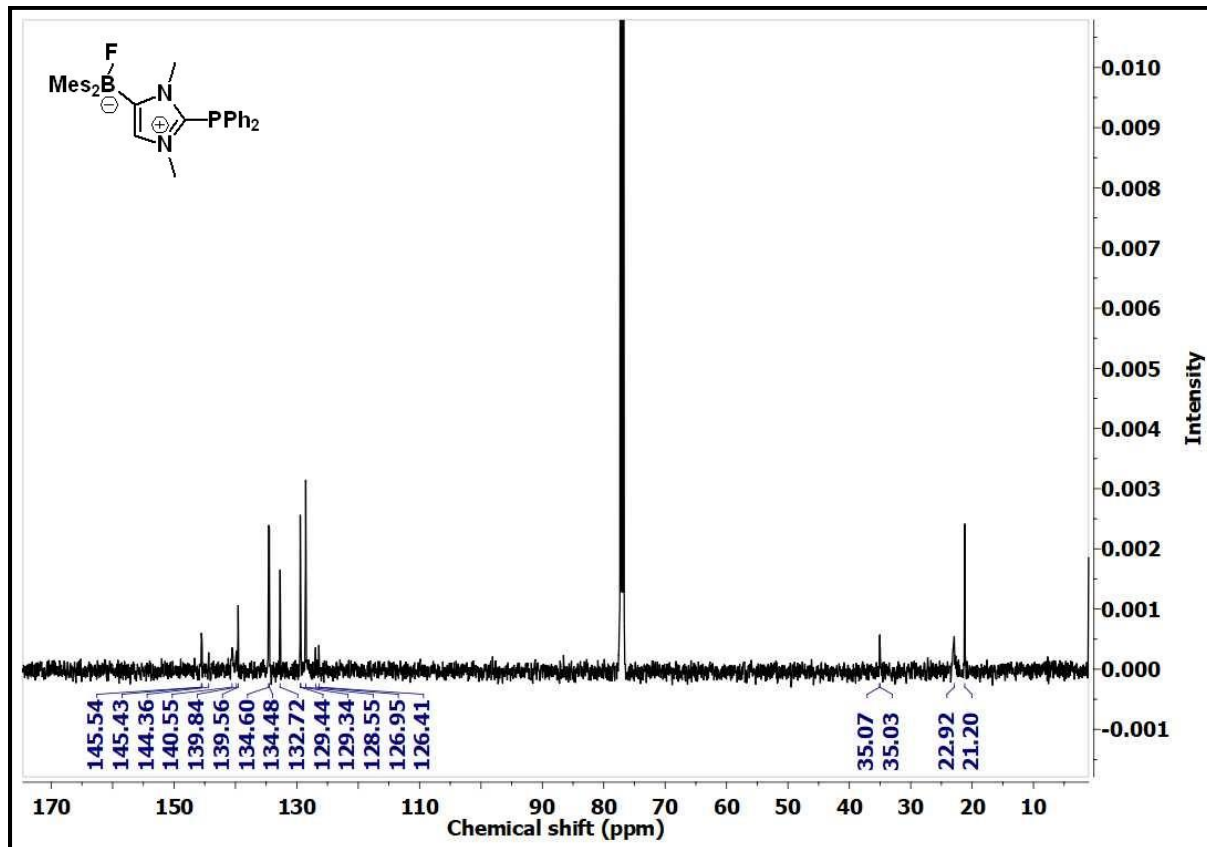

Figure S52:  $^{13}\text{C}$  NMR of 11-[F] ( $\text{CDCl}_3$ )

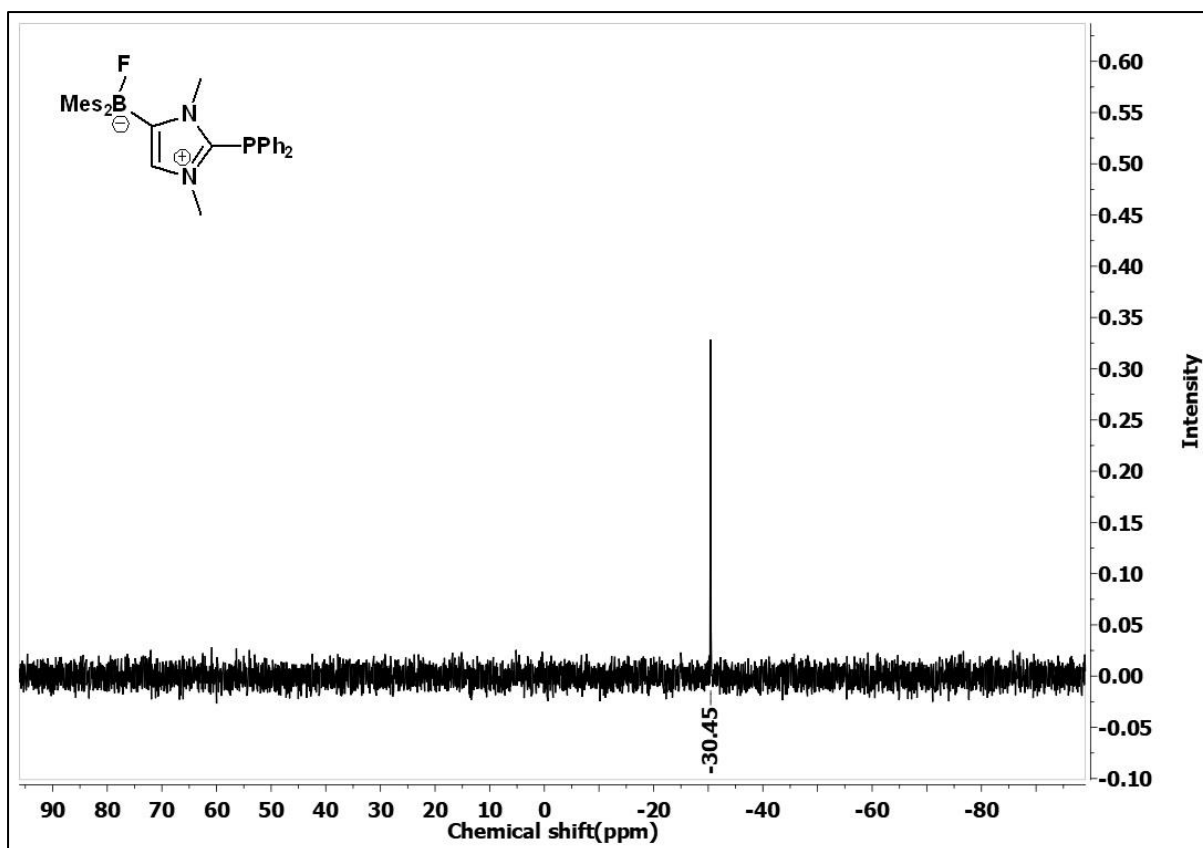

Figure S53:  $^{31}\text{P}$  NMR of 11-[F] ( $\text{CDCl}_3$ )

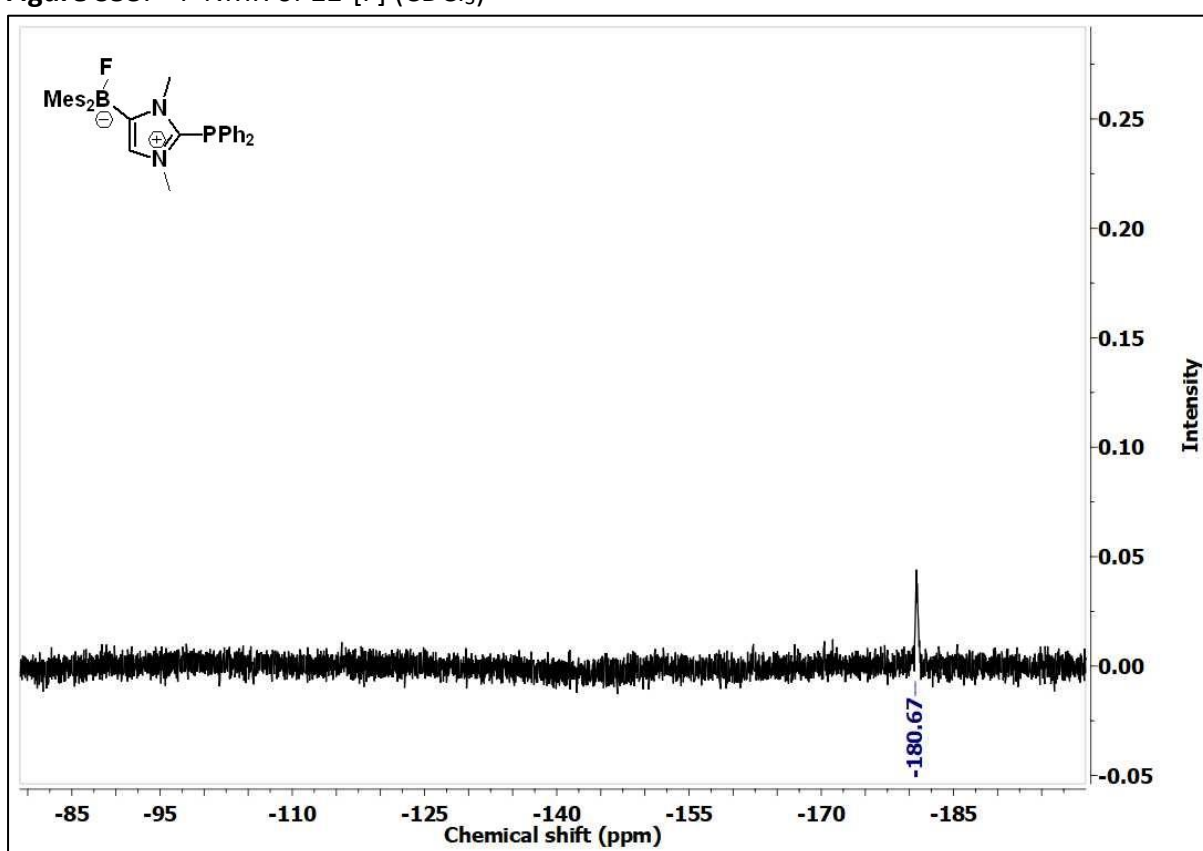

Figure S54:  $^{19}\text{F}$  NMR of 11-[F] ( $\text{CDCl}_3$ )

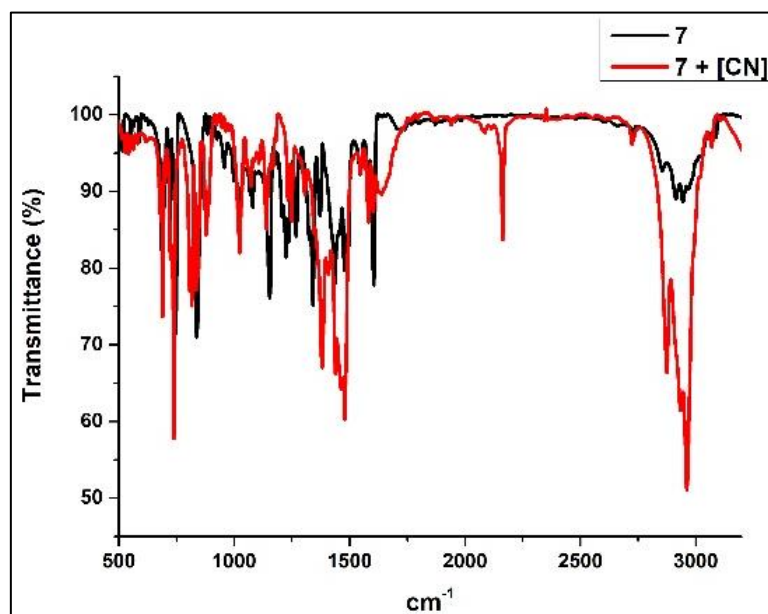

Figure S55: IR spectra of 7 and 7-[CN]

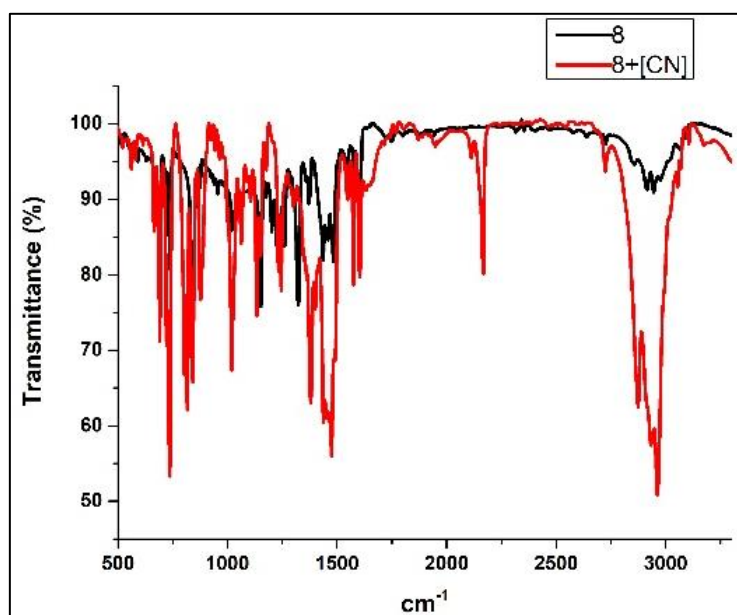

Figure S56: IR spectra of 8 and 8-[CN]

## Selectivity of 7-11 with various anions

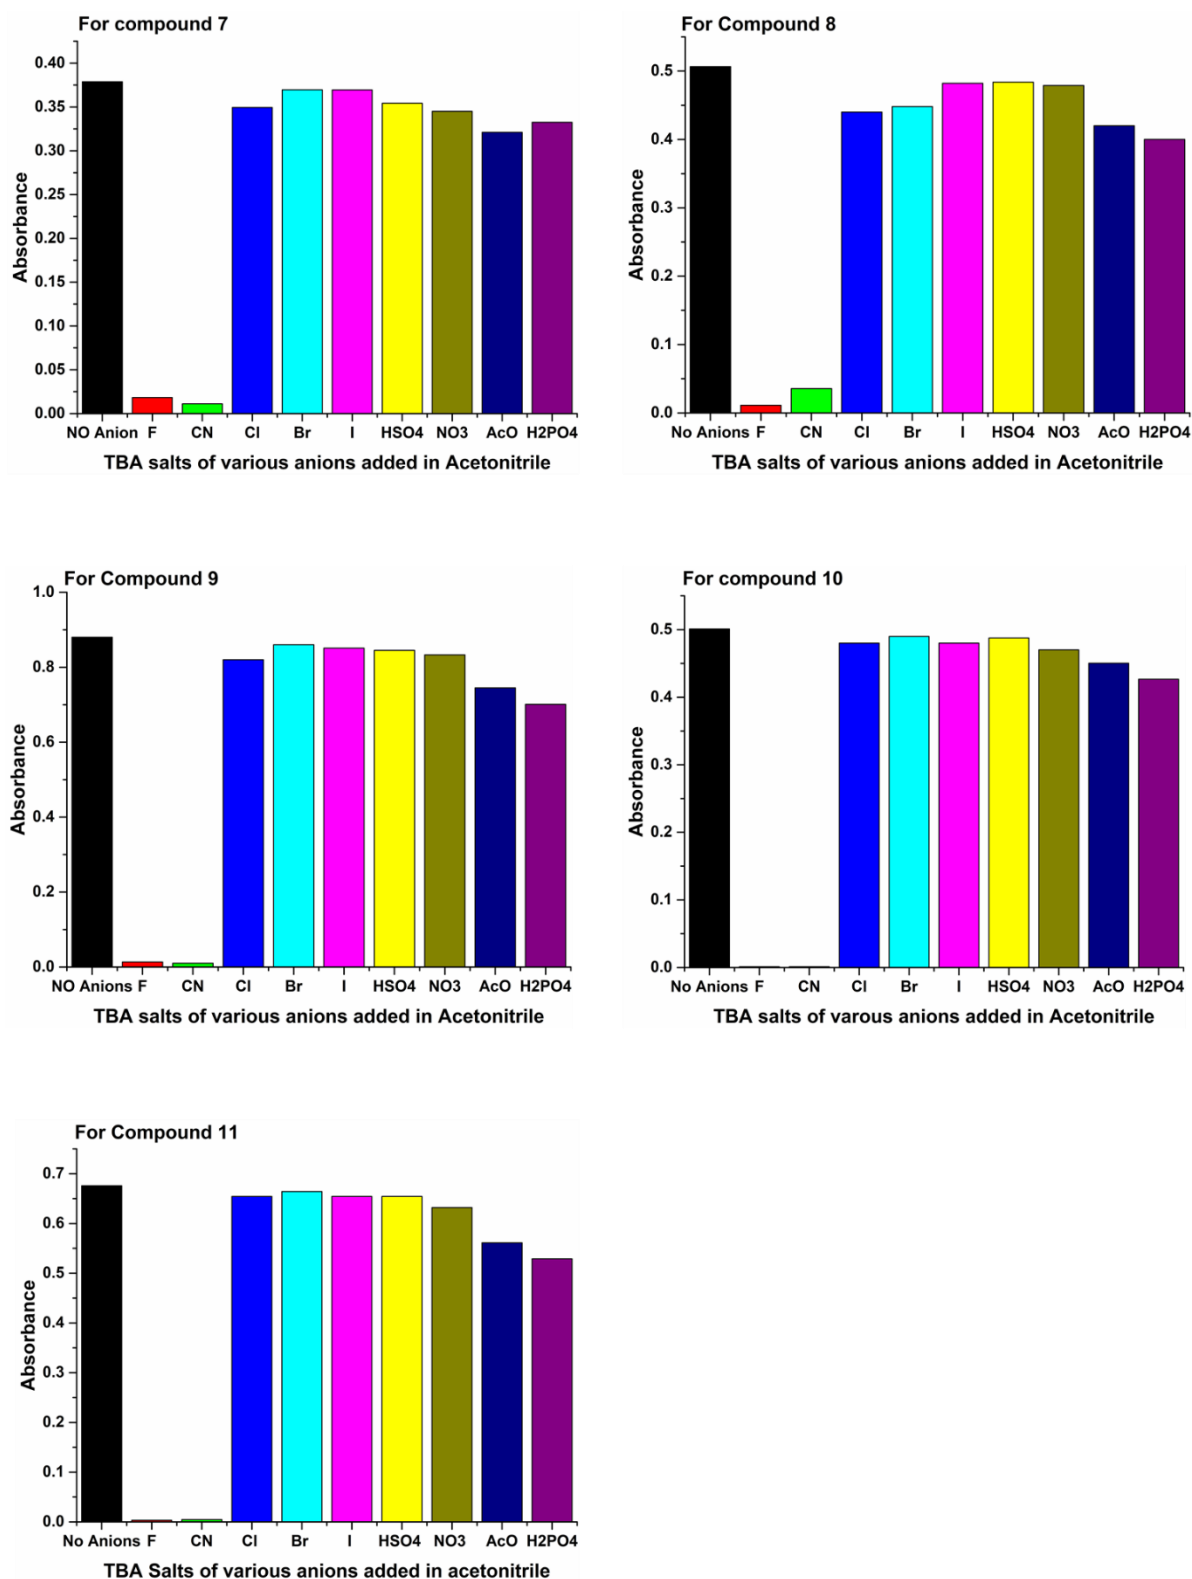

**Figure S57:** UV- vis titration of compounds 7-11 with TBAX (X= F, Cl, Br, I, CN, HSO<sub>4</sub>, NO<sub>3</sub>, OAc, H<sub>2</sub>PO<sub>4</sub>) in acetonitrile.

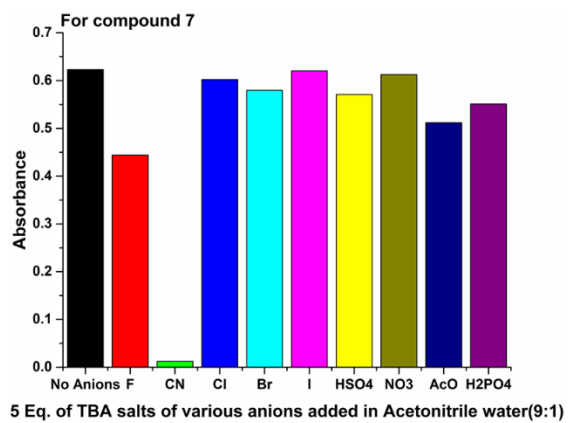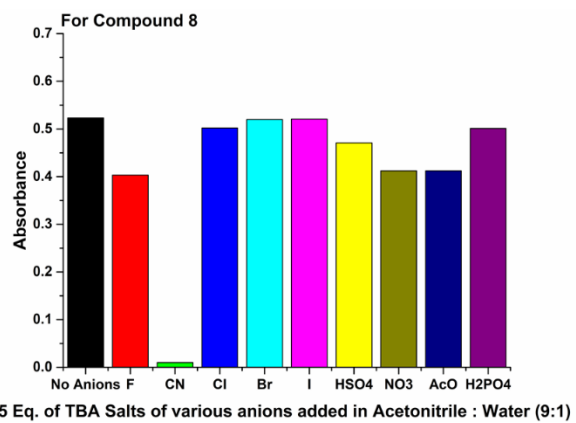

**Figure S58:** UV- vis titration of compounds **7** and **8** with TBAX (X= F, Cl, Br, I, CN, HSO<sub>4</sub>, NO<sub>3</sub>, OAc, H<sub>2</sub>PO<sub>4</sub>) in acetonitrile:water (9:1).

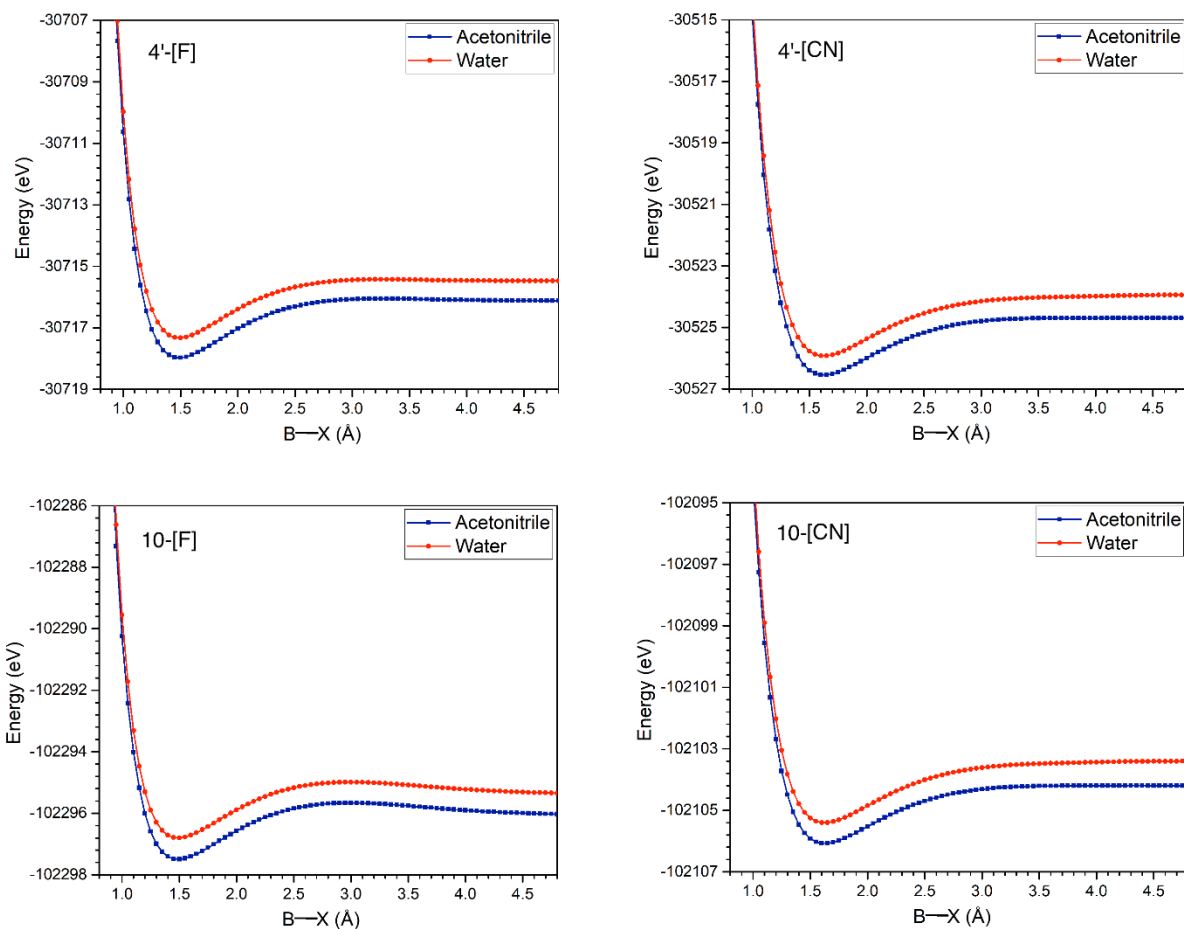

**Figure S59.** Calculated binding energy curves of B-X (where X is F<sup>-</sup>/CN<sup>-</sup> anion) in acetonitrile (blue) and water (red) solvent reaction fields for the **4'-[F]**, **4'-[CN]**, **10-[F]**, and **10-[CN]**. The estimated binding energies for B-X in acetonitrile are: **4'-[F]**=1.93 eV, **4'-[CN]**=1.85 eV, **10-[F]**=1.84 eV, **10-[CN]**=1.87 eV. Similar the estimated binding energies for B-X in water are: **4'-[F]**=1.90 eV, **4'-[CN]**=1.98 eV, **10-[F]**=1.82 eV, **10-[CN]**=2.00 eV.

**Table S7:** Calculated binding energy values of B–X (where X is F<sup>-</sup>/CN<sup>-</sup> anion) in acetonitrile and water solvent reaction fields for the **1'-[F]**, **1'-[CN]**, **7-[F]**, **7-[CN]**, **8-[F]**, **8-[CN]**, **4'-[F]**, **4'-[CN]**, **10-[F]**, and **10-[CN]** scaffolds.

| Compound  | Fluoride binding energy (eV) |       | Cyanide binding energy (eV) |       |
|-----------|------------------------------|-------|-----------------------------|-------|
|           | Acetonitrile                 | Water | Acetonitrile                | Water |
| <b>1'</b> | 1.689                        | 1.677 | 1.646                       | 1.774 |
| <b>7</b>  | 1.747                        | 1.733 | 1.699                       | 1.828 |
| <b>8</b>  | 1.735                        | 1.721 | 1.671                       | 1.803 |
| <b>4'</b> | 1.925                        | 1.904 | 1.854                       | 1.980 |
| <b>10</b> | 1.837                        | 1.816 | 1.871                       | 2.002 |

**Table S8:** Calculated Mulliken charge densities collected for selective atoms of various boron imidazole/imidazolium scaffolds.

| Compound<br>Atoms | Mulliken atomic charge (e) |        |        |        |        |       |        |        |
|-------------------|----------------------------|--------|--------|--------|--------|-------|--------|--------|
|                   | N1                         | C2     | N2     | C4     | C5     | B     | F      | CN     |
| <b>1'</b>         | 0.179                      | 0.204  | -0.318 | -1.310 | 0.270  | 0.276 | -      | -      |
| <b>1'-[F]</b>     | 0.168                      | 0.150  | -0.334 | -0.894 | -0.586 | 1.005 | -0.514 | -      |
| <b>1'-[CN]</b>    | 0.319                      | 0.176  | -0.296 | -1.018 | -0.798 | 0.920 | -      | -0.236 |
| <b>7</b>          | 0.302                      | -0.617 | -0.106 | -1.166 | 0.241  | 0.381 | -      | -      |
| <b>7-[F]</b>      | 0.343                      | -0.816 | -0.098 | -0.830 | -0.234 | 1.142 | -0.490 | -      |
| <b>7-[CN]</b>     | 0.547                      | -0.619 | -0.091 | -0.954 | -0.604 | 1.026 | -      | -0.274 |
| <b>8</b>          | 0.338                      | -0.471 | -0.112 | -1.021 | 0.168  | 0.326 | -      | -      |
| <b>8-[F]</b>      | 0.394                      | -0.523 | -0.125 | -0.765 | -0.542 | 1.055 | -0.502 | -      |
| <b>8-[CN]</b>     | 0.577                      | -0.436 | -0.104 | -0.876 | -0.830 | 0.956 | -      | -0.309 |

Note: In case of cyanide charges are reported on carbon atom.

**Table S9.** Cartesian Coordinates of the optimized imidazole and imidazolium complexes studied at B3LYP/6-31+g(d) level of theory. All the calculations were carried-out in MeCN solvent using SMD solvation model. Molecular formula, total electronic energy (HF), and the number of imaginary frequencies (NImag) are listed as well. Within the harmonic approximation, all the geometries optimized were verified as minima on their potential energy surfaces.

**1'** [BC22N2H27]

HF = -989.0615658 Ha

NImag= 0

|   |              |              |              |
|---|--------------|--------------|--------------|
| 1 | -1.875848000 | 2.492345000  | 1.221938000  |
| 7 | -0.581106000 | 4.123511000  | 0.735223000  |
| 7 | 0.964637000  | 2.896554000  | -0.306974000 |
| 6 | -0.858790000 | -1.559366000 | 2.194303000  |
| 1 | 0.025415000  | -2.067110000 | 1.793022000  |
| 1 | -1.339214000 | -2.239673000 | 2.906116000  |
| 1 | -0.501575000 | -0.689855000 | 2.758463000  |
| 6 | 2.152418000  | 2.627505000  | -1.115197000 |
| 1 | 2.879925000  | 2.037949000  | -0.554191000 |
| 1 | 2.602042000  | 3.584213000  | -1.390150000 |
| 1 | 1.873934000  | 2.088933000  | -2.024340000 |
| 6 | -0.958243000 | 2.810163000  | 0.742761000  |
| 6 | 4.942997000  | -2.809907000 | -0.215730000 |
| 1 | 5.594844000  | -2.473974000 | -1.034084000 |
| 1 | 4.720888000  | -3.868837000 | -0.398495000 |
| 1 | 5.514861000  | -2.736744000 | 0.715905000  |
| 6 | -3.734903000 | -0.525486000 | -0.838990000 |
| 1 | -4.467203000 | -0.282339000 | -1.608549000 |
| 6 | 3.679242000  | -1.984444000 | -0.152158000 |
| 6 | -2.471834000 | 0.080387000  | -0.893825000 |
| 6 | 3.460057000  | -1.062820000 | 0.876043000  |
| 1 | 4.209452000  | -0.954798000 | 1.659107000  |
| 6 | -0.022425000 | 1.991009000  | 0.109962000  |
| 6 | 0.575763000  | 4.133079000  | 0.074167000  |
| 1 | 1.156448000  | 5.013913000  | -0.168160000 |
| 6 | 1.506404000  | -1.355406000 | -1.095796000 |
| 6 | -1.481660000 | -0.234479000 | 0.079141000  |
| 6 | 1.292310000  | -0.405959000 | -0.056575000 |
| 6 | 2.304493000  | -0.267421000 | 0.932307000  |
| 6 | 2.686852000  | -2.108776000 | -1.132968000 |
| 1 | 2.832093000  | -2.818223000 | -1.946781000 |
| 6 | 0.497089000  | -1.574377000 | -2.205521000 |
| 1 | -0.437671000 | -2.002442000 | -1.825867000 |
| 1 | 0.896445000  | -2.262920000 | -2.958245000 |



|   |              |              |              |
|---|--------------|--------------|--------------|
| 1 | 0.237899000  | -0.639607000 | -2.715702000 |
| 6 | -3.112748000 | -1.727762000 | 1.134058000  |
| 1 | -3.358510000 | -2.422915000 | 1.935628000  |
| 6 | 2.194513000  | 0.712693000  | 2.085946000  |
| 1 | 2.898609000  | 0.446554000  | 2.882250000  |
| 1 | 1.191951000  | 0.742720000  | 2.522600000  |
| 1 | 2.436369000  | 1.735872000  | 1.769919000  |
| 6 | -4.082750000 | -1.429324000 | 0.171048000  |
| 6 | -5.449650000 | -2.072220000 | 0.204150000  |
| 1 | -6.245710000 | -1.327630000 | 0.078286000  |
| 1 | -5.620586000 | -2.598360000 | 1.149702000  |
| 1 | -5.563607000 | -2.802953000 | -0.608590000 |
| 6 | -1.828251000 | -1.163738000 | 1.098029000  |
| 5 | -0.044144000 | 0.446989000  | 0.022839000  |
| 6 | -2.225513000 | 1.050254000  | -2.036902000 |
| 1 | -2.832622000 | 0.775155000  | -2.907487000 |
| 1 | -1.180224000 | 1.078769000  | -2.355262000 |
| 1 | -2.504644000 | 2.074925000  | -1.758487000 |

## 7 [BC28N2H31S]

HF = -1618.3094336 Ha

NImag= 0

|   |              |              |              |
|---|--------------|--------------|--------------|
| 7 | -1.164388000 | -0.978304000 | -0.647670000 |
| 7 | -1.114889000 | -2.934708000 | 0.439858000  |
| 6 | 0.113095000  | -1.078797000 | -0.086017000 |
| 6 | 2.723302000  | -0.630614000 | 0.150490000  |
| 6 | 3.529832000  | -0.255031000 | 1.263761000  |
| 6 | 0.983832000  | 1.520997000  | -0.152686000 |
| 6 | 0.067263000  | 2.158754000  | 0.726852000  |
| 6 | 1.649408000  | 2.329810000  | -1.118333000 |
| 6 | 4.804790000  | -0.808532000 | 1.429807000  |
| 1 | 5.395489000  | -0.517670000 | 2.297851000  |
| 6 | 5.345734000  | -1.719257000 | 0.511209000  |
| 6 | 0.092958000  | -2.316669000 | 0.555771000  |
| 1 | 0.899450000  | -2.766049000 | 1.121365000  |
| 6 | 4.558605000  | -2.074982000 | -0.586328000 |
| 1 | 4.958886000  | -2.771289000 | -1.322426000 |
| 6 | 3.263502000  | -1.563573000 | -0.773333000 |
| 6 | -4.441535000 | -1.013782000 | 1.281146000  |
| 1 | -3.688431000 | -1.503357000 | 1.892674000  |
| 6 | -0.152141000 | 3.542291000  | 0.636371000  |
| 1 | -0.845203000 | 4.010254000  | 1.334400000  |
| 6 | -1.852573000 | -2.106330000 | -0.305024000 |
| 6 | -5.327960000 | -0.102230000 | 1.861298000  |
| 1 | -5.249723000 | 0.116610000  | 2.923525000  |

|    |              |              |              |
|----|--------------|--------------|--------------|
| 6  | -4.532188000 | -1.291402000 | -0.090222000 |
| 6  | -1.656909000 | 0.085187000  | -1.521571000 |
| 1  | -0.815091000 | 0.532839000  | -2.048423000 |
| 1  | -2.347119000 | -0.344441000 | -2.250362000 |
| 1  | -2.176443000 | 0.855073000  | -0.944523000 |
| 6  | 1.379478000  | 3.701862000  | -1.196104000 |
| 1  | 1.885433000  | 4.294690000  | -1.957260000 |
| 6  | 0.485973000  | 4.334862000  | -0.321944000 |
| 6  | -6.319980000 | 0.512043000  | 1.087216000  |
| 1  | -7.012555000 | 1.213590000  | 1.545256000  |
| 6  | -0.702735000 | 1.407308000  | 1.796972000  |
| 1  | -1.025525000 | 2.093919000  | 2.588211000  |
| 1  | -1.608554000 | 0.941625000  | 1.386389000  |
| 1  | -0.115459000 | 0.611614000  | 2.264306000  |
| 6  | -5.519075000 | -0.675175000 | -0.871048000 |
| 1  | -5.584898000 | -0.884830000 | -1.935653000 |
| 6  | 6.730226000  | -2.290565000 | 0.709553000  |
| 1  | 6.789044000  | -2.876307000 | 1.636704000  |
| 1  | 7.013859000  | -2.946181000 | -0.120906000 |
| 6  | 2.511684000  | -2.041011000 | -2.003925000 |
| 1  | 1.773368000  | -1.319787000 | -2.362940000 |
| 1  | 3.211418000  | -2.239323000 | -2.824614000 |
| 1  | 1.976214000  | -2.978699000 | -1.803569000 |
| 6  | 3.042167000  | 0.721572000  | 2.315760000  |
| 1  | 2.078483000  | 0.418544000  | 2.740931000  |
| 1  | 3.760937000  | 0.790319000  | 3.139669000  |
| 1  | 2.909880000  | 1.729352000  | 1.905124000  |
| 6  | 2.643038000  | 1.752428000  | -2.107531000 |
| 1  | 2.237103000  | 0.889666000  | -2.647149000 |
| 1  | 2.926423000  | 2.505803000  | -2.850679000 |
| 1  | 3.560332000  | 1.416785000  | -1.609735000 |
| 6  | -6.416700000 | 0.218803000  | -0.276341000 |
| 1  | -7.182175000 | 0.693120000  | -0.885758000 |
| 6  | 0.240937000  | 5.823190000  | -0.404131000 |
| 1  | 1.109893000  | 6.388262000  | -0.039239000 |
| 1  | 0.063284000  | 6.142644000  | -1.438597000 |
| 1  | -0.624467000 | 6.119145000  | 0.198981000  |
| 5  | 1.262749000  | -0.036220000 | -0.050791000 |
| 16 | -3.473745000 | -2.524718000 | -0.880092000 |
| 1  | 7.483088000  | -1.495191000 | 0.786552000  |

7-[F] [BC28N2H31SF-1]

HF = -1718.3227186 Ha

Nimag= 0

|    |              |              |              |
|----|--------------|--------------|--------------|
| 16 | 3.777909000  | -2.134319000 | 0.883998000  |
| 7  | 1.312152000  | -0.842041000 | 0.856741000  |
| 7  | 1.542632000  | -2.449164000 | -0.677000000 |
| 6  | -3.184267000 | -0.573295000 | -1.269728000 |
| 6  | -2.566880000 | -0.897557000 | -0.026091000 |
| 6  | -3.099651000 | -2.035454000 | 0.653086000  |
| 1  | -3.723113000 | 0.804395000  | 1.460108000  |
| 6  | -4.298334000 | -1.289694000 | -1.743122000 |
| 6  | 0.084027000  | -0.912136000 | 0.210169000  |
| 6  | 0.275594000  | -1.921890000 | -0.725768000 |
| 1  | -0.448505000 | -2.296609000 | -1.438347000 |
| 6  | 2.152249000  | -1.777360000 | 0.294750000  |
| 6  | -2.686841000 | 0.535729000  | -2.182061000 |
| 1  | -1.600026000 | 0.522126000  | -2.297522000 |
| 6  | -2.508267000 | -2.605497000 | 1.933959000  |
| 1  | -1.415796000 | -2.649426000 | 1.902409000  |
| 6  | 4.854583000  | -0.984415000 | 0.001508000  |
| 1  | 0.494130000  | 0.771231000  | -1.784800000 |
| 6  | 4.483348000  | -0.334281000 | -1.182078000 |
| 1  | 3.494248000  | -0.484402000 | -1.604082000 |
| 6  | 5.394098000  | 0.511426000  | -1.824309000 |
| 1  | 5.095977000  | 1.015742000  | -2.740538000 |
| 5  | -1.263656000 | -0.064542000 | 0.608542000  |
| 6  | 1.661469000  | 0.053247000  | 1.957429000  |
| 6  | -4.217323000 | -2.726436000 | 0.150650000  |
| 1  | -4.737701000 | -1.003141000 | -2.698834000 |
| 6  | -4.853075000 | -2.360667000 | -1.038174000 |
| 1  | -3.127038000 | 0.427382000  | -3.180708000 |
| 1  | -2.956662000 | 1.531518000  | -1.812257000 |
| 1  | -2.884060000 | -3.622878000 | 2.097957000  |
| 1  | -2.774094000 | -2.009573000 | 2.814722000  |
| 6  | 6.139952000  | -0.791998000 | 0.531716000  |
| 6  | 6.678050000  | 0.702720000  | -1.303287000 |
| 6  | -1.261166000 | 1.581732000  | 0.334858000  |
| 9  | -1.322094000 | -0.155785000 | 2.100272000  |
| 1  | 0.997499000  | 0.915421000  | 1.936245000  |
| 1  | 2.693484000  | 0.392026000  | 1.846955000  |
| 1  | 1.553451000  | -0.456110000 | 2.920942000  |
| 1  | -4.592386000 | -3.587524000 | 0.704192000  |
| 6  | -6.078731000 | -3.089356000 | -1.540549000 |
| 6  | 7.047137000  | 0.044450000  | -0.124724000 |
| 1  | 6.433004000  | -1.288698000 | 1.453893000  |
| 1  | 7.382774000  | 1.358130000  | -1.808485000 |

|   |              |              |              |
|---|--------------|--------------|--------------|
| 6 | -2.270724000 | 2.365091000  | 0.972865000  |
| 6 | -0.316825000 | 2.307267000  | -0.449429000 |
| 1 | -6.138212000 | -4.104070000 | -1.129511000 |
| 1 | -6.082949000 | -3.163744000 | -2.635424000 |
| 1 | -7.001721000 | -2.566225000 | -1.251012000 |
| 1 | 8.040642000  | 0.186455000  | 0.294008000  |
| 6 | -3.368544000 | 1.765680000  | 1.838141000  |
| 6 | -2.311093000 | 3.763485000  | 0.834254000  |
| 6 | 0.814211000  | 1.656230000  | -1.229168000 |
| 6 | -0.384644000 | 3.708296000  | -0.560238000 |
| 1 | -4.225431000 | 2.448492000  | 1.891494000  |
| 1 | -3.023396000 | 1.593985000  | 2.865461000  |
| 1 | -3.109082000 | 4.316935000  | 1.329974000  |
| 6 | -1.368980000 | 4.466076000  | 0.079080000  |
| 1 | 1.235154000  | 2.368924000  | -1.948385000 |
| 1 | 1.634338000  | 1.338844000  | -0.575294000 |
| 1 | 0.354555000  | 4.220582000  | -1.176481000 |
| 6 | -1.402673000 | 5.973662000  | -0.030357000 |
| 1 | -1.069855000 | 6.313555000  | -1.019144000 |
| 1 | -2.412298000 | 6.365108000  | 0.143431000  |
| 1 | -0.740051000 | 6.443531000  | 0.711412000  |

### 7-[CN] [BC29N3H31S-1]

HF = -1711.2892865 Ha

NImag= 0

|    |              |              |              |
|----|--------------|--------------|--------------|
| 16 | 3.829104000  | -2.084028000 | 0.897042000  |
| 7  | 1.353414000  | -0.810389000 | 0.884181000  |
| 7  | 1.561289000  | -2.468130000 | -0.598762000 |
| 6  | -3.100111000 | -0.568908000 | -1.348104000 |
| 6  | -2.524167000 | -0.928840000 | -0.092967000 |
| 6  | -3.053278000 | -2.108339000 | 0.514946000  |
| 1  | -3.760552000 | 0.753708000  | 1.277503000  |
| 6  | -4.190006000 | -1.281594000 | -1.880037000 |
| 6  | 0.112367000  | -0.908712000 | 0.261309000  |
| 6  | 0.291776000  | -1.949452000 | -0.642324000 |
| 1  | -0.443700000 | -2.351237000 | -1.326918000 |
| 6  | 2.186219000  | -1.760676000 | 0.335831000  |
| 6  | -2.580438000 | 0.557692000  | -2.225254000 |
| 1  | -1.489585000 | 0.564473000  | -2.286650000 |
| 6  | -2.480478000 | -2.741050000 | 1.772802000  |
| 1  | -1.389345000 | -2.682815000 | 1.812726000  |
| 6  | 4.870846000  | -0.956083000 | -0.054189000 |
| 1  | 0.621566000  | 0.734488000  | -1.663795000 |

|   |              |              |              |
|---|--------------|--------------|--------------|
| 6 | 4.486279000  | -0.405703000 | -1.283411000 |
| 1 | 3.506603000  | -0.621241000 | -1.699277000 |
| 6 | 5.372158000  | 0.423973000  | -1.979059000 |
| 1 | 5.063884000  | 0.850825000  | -2.930558000 |
| 5 | -1.261204000 | -0.070085000 | 0.599058000  |
| 6 | 1.737844000  | 0.127641000  | 1.937081000  |
| 6 | -4.144680000 | -2.793314000 | -0.047855000 |
| 1 | -4.598318000 | -0.967984000 | -2.840678000 |
| 6 | -4.754721000 | -2.383839000 | -1.234983000 |
| 1 | -2.968581000 | 0.444423000  | -3.244514000 |
| 1 | -2.888192000 | 1.546051000  | -1.866293000 |
| 1 | -2.757362000 | -3.801113000 | 1.813858000  |
| 1 | -2.862524000 | -2.271403000 | 2.687071000  |
| 6 | 6.144033000  | -0.681420000 | 0.468198000  |
| 6 | 6.644473000  | 0.696814000  | -1.465755000 |
| 6 | -1.274262000 | 1.583795000  | 0.296711000  |
| 7 | -1.357617000 | -0.049270000 | 3.391230000  |
| 6 | -1.359642000 | -0.100578000 | 2.223886000  |
| 1 | 1.079433000  | 0.994043000  | 1.904637000  |
| 1 | 2.765189000  | 0.460249000  | 1.777756000  |
| 1 | 1.662587000  | -0.342393000 | 2.922653000  |
| 1 | -4.515803000 | -3.686155000 | 0.455352000  |
| 6 | -5.956165000 | -3.105921000 | -1.800351000 |
| 6 | 7.027153000  | 0.137262000  | -0.241720000 |
| 1 | 6.445660000  | -1.099692000 | 1.425914000  |
| 1 | 7.329857000  | 1.339055000  | -2.012773000 |
| 6 | -2.351453000 | 2.368596000  | 0.811108000  |
| 6 | -0.274161000 | 2.301245000  | -0.425607000 |
| 1 | -5.945552000 | -4.170340000 | -1.536748000 |
| 1 | -5.996033000 | -3.024401000 | -2.893172000 |
| 1 | -6.894115000 | -2.685371000 | -1.409735000 |
| 1 | 8.011556000  | 0.344249000  | 0.171170000  |
| 6 | -3.542850000 | 1.785965000  | 1.556446000  |
| 6 | -2.387071000 | 3.763635000  | 0.645300000  |
| 6 | 0.900224000  | 1.650880000  | -1.138499000 |
| 6 | -0.342116000 | 3.699718000  | -0.563173000 |
| 1 | -4.440134000 | 2.383694000  | 1.354365000  |
| 1 | -3.385306000 | 1.801765000  | 2.642965000  |
| 1 | -3.236761000 | 4.315665000  | 1.047920000  |
| 6 | -1.380138000 | 4.462292000  | -0.022844000 |
| 1 | 1.318340000  | 2.345137000  | -1.876655000 |
| 1 | 1.713035000  | 1.390853000  | -0.451812000 |
| 1 | 0.440233000  | 4.205486000  | -1.128874000 |
| 6 | -1.410640000 | 5.967826000  | -0.154217000 |

|   |              |             |              |
|---|--------------|-------------|--------------|
| 1 | -0.878450000 | 6.303011000 | -1.052388000 |
| 1 | -2.438830000 | 6.345828000 | -0.204697000 |
| 1 | -0.930020000 | 6.453121000 | 0.707537000  |

**8 [BC28N2H31Se]**

HF = -3619.5413041 Ha

NImag= 0

|    |              |              |              |
|----|--------------|--------------|--------------|
| 7  | 0.965981000  | -0.790358000 | -0.487424000 |
| 6  | -1.357006000 | 1.576426000  | -0.173624000 |
| 6  | -0.514272000 | 2.318556000  | 0.699552000  |
| 6  | -1.073334000 | 4.412110000  | -0.448328000 |
| 6  | -0.401584000 | 3.710191000  | 0.557120000  |
| 1  | 0.233637000  | 4.258676000  | 1.251279000  |
| 6  | 5.197956000  | 0.098280000  | -0.767730000 |
| 1  | 5.203790000  | -0.094981000 | -1.836829000 |
| 6  | -2.050717000 | 2.290993000  | -1.191617000 |
| 6  | -1.886152000 | 3.676315000  | -1.319942000 |
| 1  | -2.412173000 | 4.196367000  | -2.119705000 |
| 6  | 1.399347000  | 0.258920000  | -1.407000000 |
| 1  | 1.799453000  | 1.117604000  | -0.860919000 |
| 1  | 0.549980000  | 0.578368000  | -2.010614000 |
| 1  | 2.173528000  | -0.143765000 | -2.062598000 |
| 6  | 0.276084000  | 1.671883000  | 1.821907000  |
| 1  | 0.640542000  | 2.433396000  | 2.520184000  |
| 1  | 1.153311000  | 1.133814000  | 1.442833000  |
| 6  | 5.941993000  | 1.161221000  | -0.242288000 |
| 1  | 6.529431000  | 1.786772000  | -0.910091000 |
| 5  | -1.531859000 | 0.009843000  | 0.001187000  |
| 6  | -0.944609000 | 5.911228000  | -0.582968000 |
| 1  | -1.862893000 | 6.418295000  | -0.255425000 |
| 1  | -0.770887000 | 6.205977000  | -1.625343000 |
| 1  | -0.118407000 | 6.297048000  | 0.024353000  |
| 6  | -0.316249000 | -0.949681000 | 0.053343000  |
| 6  | 1.716402000  | -1.851164000 | -0.080382000 |
| 6  | 4.441049000  | -0.706579000 | 0.090135000  |
| 6  | -2.959513000 | 1.596878000  | -2.187387000 |
| 1  | -0.318171000 | 0.951895000  | 2.393419000  |
| 6  | 5.923337000  | 1.422750000  | 1.131277000  |
| 6  | -2.955666000 | -0.672516000 | 0.186504000  |
| 6  | -0.228793000 | -2.151958000 | 0.753462000  |
| 7  | 1.020590000  | -2.691902000 | 0.689557000  |
| 34 | 3.498497000  | -2.236110000 | -0.648083000 |
| 6  | 4.428614000  | -0.458137000 | 1.467630000  |

|   |              |              |              |
|---|--------------|--------------|--------------|
| 1 | -3.277430000 | 2.294925000  | -2.969568000 |
| 1 | -3.862921000 | 1.203922000  | -1.706769000 |
| 1 | -2.464126000 | 0.751834000  | -2.678397000 |
| 1 | 6.499147000  | 2.251059000  | 1.536336000  |
| 6 | 5.163764000  | 0.612656000  | 1.984085000  |
| 6 | -3.394259000 | -1.689994000 | -0.702642000 |
| 6 | -3.832981000 | -0.288745000 | 1.241250000  |
| 1 | -1.016045000 | -2.627925000 | 1.324644000  |
| 1 | 3.854015000  | -1.095988000 | 2.133412000  |
| 1 | 5.149784000  | 0.806744000  | 3.053897000  |
| 6 | -4.662827000 | -2.270786000 | -0.540434000 |
| 6 | -2.557397000 | -2.188061000 | -1.868880000 |
| 6 | -3.456279000 | 0.777750000  | 2.250712000  |
| 6 | -5.076884000 | -0.914611000 | 1.387991000  |
| 6 | -5.518126000 | -1.908010000 | 0.502973000  |
| 1 | -4.986580000 | -3.030563000 | -1.250792000 |
| 1 | -1.905586000 | -1.417055000 | -2.288221000 |
| 1 | -3.206483000 | -2.550956000 | -2.674634000 |
| 1 | -1.913675000 | -3.025616000 | -1.570064000 |
| 1 | -4.220291000 | 0.855470000  | 3.031978000  |
| 1 | -3.357049000 | 1.764078000  | 1.783172000  |
| 1 | -2.501642000 | 0.557261000  | 2.742239000  |
| 1 | -5.723093000 | -0.614245000 | 2.212168000  |
| 6 | -6.867750000 | -2.563044000 | 0.681742000  |
| 1 | -7.105148000 | -3.223527000 | -0.159390000 |
| 1 | -7.667495000 | -1.815916000 | 0.764950000  |
| 1 | -6.897004000 | -3.165852000 | 1.599703000  |

**8-[F] [BC28N2H31SeF-1]**

HF = -3719.553704 Ha

NImag= 0

|   |              |              |              |
|---|--------------|--------------|--------------|
| 9 | -1.496374000 | -0.157789000 | -2.068080000 |
| 6 | -2.827111000 | -0.858266000 | 0.028864000  |
| 6 | -3.400702000 | -1.961847000 | -0.674367000 |
| 6 | -3.419527000 | -0.552005000 | 1.288288000  |
| 6 | -0.171780000 | -0.866194000 | -0.106997000 |
| 6 | -0.606398000 | 2.372773000  | 0.443536000  |
| 1 | -0.768758000 | -2.255667000 | 1.513766000  |
| 6 | -1.525004000 | 1.617639000  | -0.339570000 |
| 6 | -2.529076000 | 2.376488000  | -1.021921000 |
| 6 | -2.839758000 | -2.518955000 | -1.974776000 |
| 1 | -3.066003000 | -1.878733000 | -2.834928000 |
| 1 | -3.273450000 | -3.506557000 | -2.174241000 |

|    |              |              |              |
|----|--------------|--------------|--------------|
| 1  | -1.751648000 | -2.628597000 | -1.944351000 |
| 1  | 0.759403000  | 0.909601000  | -1.868342000 |
| 1  | -1.788341000 | 0.481568000  | 2.305437000  |
| 6  | -3.591095000 | 1.743872000  | -1.907828000 |
| 1  | -3.203755000 | 1.530547000  | -2.912002000 |
| 1  | -4.444092000 | 2.423651000  | -2.024256000 |
| 1  | -3.962664000 | 0.798176000  | -1.506797000 |
| 5  | -1.503742000 | -0.036693000 | -0.577915000 |
| 6  | -4.532694000 | -2.632061000 | -0.176369000 |
| 6  | -4.548147000 | -1.248022000 | 1.757690000  |
| 6  | -2.877339000 | 0.517728000  | 2.221084000  |
| 6  | -0.014577000 | -1.871565000 | 0.838024000  |
| 7  | 1.090591000  | -0.776536000 | -0.686943000 |
| 6  | -0.691315000 | 3.777699000  | 0.516617000  |
| 6  | 0.526353000  | 1.764127000  | 1.255400000  |
| 6  | -2.588535000 | 3.774963000  | -0.917721000 |
| 1  | -4.939494000 | -3.466888000 | -0.747651000 |
| 6  | -5.142698000 | -2.282199000 | 1.030846000  |
| 1  | -4.965472000 | -0.976085000 | 2.727328000  |
| 1  | -3.292235000 | 0.386360000  | 3.227807000  |
| 1  | -3.140136000 | 1.529307000  | 1.890546000  |
| 7  | 1.267328000  | -2.372927000 | 0.862116000  |
| 6  | 1.485449000  | 0.103538000  | -1.783311000 |
| 6  | 1.912187000  | -1.689876000 | -0.075751000 |
| 6  | -1.670550000 | 4.507283000  | -0.157470000 |
| 1  | 0.032581000  | 4.313262000  | 1.130947000  |
| 1  | 0.845033000  | 2.462050000  | 2.039026000  |
| 1  | 0.253073000  | 0.823329000  | 1.736185000  |
| 1  | 1.407915000  | 1.561193000  | 0.634766000  |
| 1  | -3.379503000 | 4.307462000  | -1.447047000 |
| 6  | -6.382914000 | -2.990008000 | 1.527796000  |
| 1  | 2.472625000  | 0.526592000  | -1.586832000 |
| 1  | 1.517237000  | -0.449834000 | -2.727978000 |
| 34 | 3.703748000  | -2.059850000 | -0.617542000 |
| 6  | -1.746569000 | 6.014875000  | -0.068937000 |
| 1  | -7.297345000 | -2.482965000 | 1.187293000  |
| 1  | -6.430420000 | -4.022137000 | 1.160174000  |
| 1  | -6.418754000 | -3.016513000 | 2.623580000  |
| 6  | 4.648047000  | -0.554395000 | 0.175005000  |
| 1  | -2.721263000 | 6.348726000  | 0.311724000  |
| 1  | -1.613665000 | 6.483275000  | -1.053763000 |
| 1  | -0.972945000 | 6.414385000  | 0.596821000  |
| 6  | 4.533727000  | -0.265502000 | 1.539820000  |
| 6  | 5.495426000  | 0.207699000  | -0.637095000 |



|   |             |              |              |
|---|-------------|--------------|--------------|
| 1 | 3.885057000 | -0.865418000 | 2.172250000  |
| 6 | 5.255821000 | 0.798923000  | 2.086731000  |
| 6 | 6.227647000 | 1.263183000  | -0.080668000 |
| 1 | 5.578179000 | -0.011838000 | -1.698213000 |
| 1 | 5.160472000 | 1.024204000  | 3.146546000  |
| 6 | 6.107140000 | 1.563547000  | 1.279805000  |
| 1 | 6.883717000 | 1.854439000  | -0.715089000 |
| 1 | 6.671819000 | 2.387164000  | 1.709464000  |

**8-[CN] [BC29N3H31Se-1]**

HF = -3712.5206118 Ha

NImag= 1 [methyl rotation of mesityl with -12.8 cm<sup>-1</sup>]

|    |              |              |              |
|----|--------------|--------------|--------------|
| 34 | 3.767022000  | -1.942830000 | 0.721364000  |
| 7  | 1.126041000  | -0.720521000 | 0.754217000  |
| 7  | 1.324705000  | -2.390518000 | -0.712725000 |
| 6  | -2.782004000 | -0.902940000 | -0.126650000 |
| 6  | -3.372946000 | -0.513033000 | -1.367500000 |
| 6  | -3.308341000 | -2.092300000 | 0.461053000  |
| 6  | -4.473113000 | -1.207157000 | -1.899562000 |
| 6  | -0.137203000 | -0.861959000 | 0.181353000  |
| 6  | 1.960563000  | -1.649992000 | 0.185420000  |
| 6  | 0.035882000  | -1.910925000 | -0.712343000 |
| 1  | -0.712437000 | -2.344287000 | -1.362756000 |
| 6  | -2.858333000 | 0.628812000  | -2.227921000 |
| 1  | -1.767861000 | 0.642339000  | -2.290180000 |
| 1  | -3.981386000 | 0.708461000  | 1.365925000  |
| 6  | -2.723674000 | -2.756811000 | 1.697103000  |
| 1  | -1.631850000 | -2.705358000 | 1.725232000  |
| 6  | 4.664792000  | -0.523277000 | -0.260448000 |
| 1  | 0.328835000  | 0.794423000  | -1.636800000 |
| 6  | 4.482921000  | -0.370115000 | -1.639830000 |
| 1  | 3.806233000  | -1.028051000 | -2.177805000 |
| 5  | -1.513757000 | -0.054790000 | 0.567196000  |
| 6  | 5.172915000  | 0.635706000  | -2.322872000 |
| 1  | 5.024415000  | 0.756086000  | -3.393399000 |
| 6  | 1.525426000  | 0.227554000  | 1.791324000  |
| 6  | -4.413768000 | -2.757861000 | -0.100843000 |
| 1  | -4.892378000 | -0.870374000 | -2.847711000 |
| 6  | -5.036581000 | -2.320069000 | -1.269898000 |
| 1  | -3.172107000 | 1.610670000  | -1.856536000 |
| 1  | -3.246417000 | 0.528457000  | -3.248703000 |
| 1  | -3.092381000 | -2.308529000 | 2.627463000  |
| 1  | -3.005121000 | -3.816348000 | 1.716025000  |

|   |              |              |              |
|---|--------------|--------------|--------------|
| 6 | 5.547645000  | 0.313625000  | 0.430845000  |
| 6 | -1.554046000 | 1.608640000  | 0.318585000  |
| 7 | -1.533004000 | -0.122683000 | 3.361200000  |
| 6 | -1.571572000 | -0.136655000 | 2.193316000  |
| 6 | 6.060737000  | 1.473925000  | -1.637367000 |
| 1 | 0.794177000  | 1.031933000  | 1.845137000  |
| 1 | 2.500949000  | 0.654074000  | 1.549858000  |
| 1 | 1.584723000  | -0.269066000 | 2.765169000  |
| 1 | -4.784887000 | -3.657809000 | 0.389208000  |
| 6 | -6.246888000 | -3.022826000 | -1.840527000 |
| 6 | 6.248422000  | 1.308294000  | -0.261645000 |
| 1 | 5.683219000  | 0.199074000  | 1.502980000  |
| 6 | -0.581153000 | 2.361786000  | -0.406347000 |
| 6 | -2.621407000 | 2.363509000  | 0.891832000  |
| 1 | 6.600962000  | 2.250820000  | -2.172522000 |
| 1 | -7.167207000 | -2.452745000 | -1.648629000 |
| 1 | -6.168626000 | -3.144405000 | -2.928345000 |
| 1 | -6.379108000 | -4.016218000 | -1.396193000 |
| 1 | 6.933121000  | 1.957557000  | 0.278976000  |
| 6 | -0.660700000 | 3.763226000  | -0.484643000 |
| 6 | 0.578878000  | 1.751998000  | -1.177514000 |
| 6 | -2.670035000 | 3.764551000  | 0.783881000  |
| 6 | -3.787617000 | 1.744337000  | 1.647338000  |
| 6 | -1.686552000 | 4.496463000  | 0.117640000  |
| 1 | 0.101940000  | 4.295821000  | -1.052995000 |
| 1 | 0.894133000  | 2.434486000  | -1.975669000 |
| 1 | 1.456054000  | 1.585857000  | -0.541385000 |
| 1 | -3.510426000 | 4.294047000  | 1.233447000  |
| 1 | -4.703446000 | 2.318464000  | 1.459479000  |
| 1 | -3.618132000 | 1.760024000  | 2.732212000  |
| 6 | -1.727128000 | 6.006163000  | 0.046589000  |
| 1 | -1.048306000 | 6.459136000  | 0.783149000  |
| 1 | -2.733378000 | 6.389315000  | 0.252248000  |
| 1 | -1.418161000 | 6.372351000  | -0.940293000 |

4' [BC23N2H30+1]

HF = -1028.8321512 Ha

NImag= 0

|   |              |              |              |
|---|--------------|--------------|--------------|
| 7 | -1.173176000 | 3.708185000  | -0.372163000 |
| 7 | 0.493806000  | 2.729196000  | 0.630283000  |
| 6 | -0.068558000 | 3.906666000  | 0.360408000  |
| 6 | -1.304811000 | -0.751281000 | -0.030240000 |
| 6 | -1.481953000 | -1.695989000 | -1.082879000 |

|   |              |              |              |
|---|--------------|--------------|--------------|
| 6 | -2.655355000 | -2.455248000 | -1.152722000 |
| 1 | -2.779474000 | -3.156813000 | -1.976839000 |
| 6 | -0.281944000 | 1.702542000  | 0.066663000  |
| 6 | 1.457246000  | -0.413641000 | 0.038683000  |
| 6 | -1.328089000 | 2.354762000  | -0.549628000 |
| 1 | -2.160231000 | 1.955688000  | -1.111246000 |
| 6 | -2.333470000 | -0.635912000 | 0.942620000  |
| 6 | -2.059411000 | 4.754533000  | -0.890573000 |
| 1 | -3.081472000 | 4.551336000  | -0.564287000 |
| 1 | -2.010420000 | 4.761696000  | -1.981834000 |
| 1 | -1.729691000 | 5.716637000  | -0.498021000 |
| 6 | -3.481001000 | -1.439233000 | 0.853629000  |
| 1 | -4.244885000 | -1.350651000 | 1.625027000  |
| 6 | 2.410454000  | 0.028463000  | -0.920637000 |
| 6 | -3.670503000 | -2.347132000 | -0.191464000 |
| 6 | 1.861471000  | -1.410636000 | 0.972131000  |
| 6 | 3.168386000  | -1.913204000 | 0.940783000  |
| 1 | 3.460656000  | -2.662846000 | 1.674873000  |
| 6 | 4.105143000  | -1.490272000 | -0.010698000 |
| 6 | 2.091382000  | 1.080144000  | -1.966881000 |
| 1 | 1.109187000  | 0.935972000  | -2.428341000 |
| 1 | 2.840259000  | 1.061959000  | -2.766295000 |
| 1 | 2.102517000  | 2.091390000  | -1.539406000 |
| 6 | 1.693393000  | 2.583441000  | 1.462946000  |
| 1 | 2.534440000  | 2.251030000  | 0.852817000  |
| 1 | 1.498164000  | 1.857920000  | 2.253774000  |
| 1 | 1.920236000  | 3.554189000  | 1.905903000  |
| 6 | 3.698299000  | -0.525937000 | -0.938808000 |
| 1 | 4.403000000  | -0.192296000 | -1.699042000 |
| 6 | -0.439474000 | -1.908201000 | -2.162843000 |
| 1 | -0.102356000 | -0.965392000 | -2.606322000 |
| 1 | -0.844204000 | -2.530091000 | -2.968592000 |
| 1 | 0.449837000  | -2.415159000 | -1.769491000 |
| 6 | -2.243862000 | 0.308328000  | 2.129017000  |
| 1 | -1.214215000 | 0.509832000  | 2.437677000  |
| 1 | -2.770978000 | -0.115333000 | 2.991790000  |
| 1 | -2.713308000 | 1.276023000  | 1.907994000  |
| 6 | -4.919951000 | -3.189834000 | -0.288106000 |
| 1 | -5.471307000 | -2.975899000 | -1.213404000 |
| 1 | -5.592851000 | -3.004646000 | 0.555990000  |
| 1 | -4.678072000 | -4.260643000 | -0.301461000 |
| 6 | 0.925571000  | -1.953181000 | 2.034832000  |
| 1 | 0.419481000  | -1.155970000 | 2.590297000  |
| 1 | 1.479454000  | -2.562251000 | 2.757342000  |

|   |              |              |              |
|---|--------------|--------------|--------------|
| 1 | 0.144560000  | -2.587327000 | 1.598489000  |
| 6 | 5.509504000  | -2.045228000 | -0.018974000 |
| 1 | 6.118869000  | -1.584833000 | 0.771349000  |
| 1 | 6.009537000  | -1.853446000 | -0.974667000 |
| 1 | 5.513655000  | -3.126905000 | 0.161907000  |
| 5 | -0.012855000 | 0.156662000  | 0.046180000  |
| 1 | 0.294673000  | 4.868152000  | 0.692728000  |

### 9 [BC29N2H34S+1]

HF = -1658.0747842 Ha

Nlmag= 1 [methyl rotation of mesityl with -11.4 cm<sup>-1</sup>]

|   |              |              |              |
|---|--------------|--------------|--------------|
| 7 | 1.117563000  | -0.798096000 | -0.709414000 |
| 7 | 1.110326000  | -2.726171000 | 0.323416000  |
| 6 | -1.069786000 | 1.657344000  | -0.098158000 |
| 6 | -2.764227000 | -0.543358000 | 0.093496000  |
| 6 | -5.334850000 | -1.753688000 | 0.403593000  |
| 6 | -3.244552000 | -1.491721000 | -0.847400000 |
| 6 | 1.861675000  | -1.888146000 | -0.432697000 |
| 6 | -4.853546000 | -0.823146000 | 1.336215000  |
| 6 | -1.758829000 | 2.488399000  | -1.028170000 |
| 6 | 1.563020000  | 0.305043000  | -1.567752000 |
| 1 | 2.064472000  | 1.069120000  | -0.969912000 |
| 1 | 0.694051000  | 0.733314000  | -2.063712000 |
| 1 | 2.251588000  | -0.087674000 | -2.316932000 |
| 6 | -3.605552000 | -0.207184000 | 1.194798000  |
| 6 | -4.516017000 | -2.064540000 | -0.684471000 |
| 1 | -4.872929000 | -2.771397000 | -1.432438000 |
| 6 | 0.627329000  | 1.492317000  | 1.836705000  |
| 1 | 0.033607000  | 0.705914000  | 2.312491000  |
| 1 | 0.987792000  | 2.160456000  | 2.626559000  |
| 1 | 1.510703000  | 1.011856000  | 1.396438000  |
| 6 | -0.156565000 | 2.274669000  | 0.799872000  |
| 6 | -0.119192000 | -2.156809000 | 0.505334000  |
| 1 | -0.885589000 | -2.655690000 | 1.079529000  |
| 6 | -3.187065000 | 0.793302000  | 2.254048000  |
| 1 | -2.197625000 | 0.568444000  | 2.667496000  |
| 1 | -3.901996000 | 0.794061000  | 3.084032000  |
| 1 | -3.144237000 | 1.812857000  | 1.852854000  |
| 6 | 1.520220000  | -4.039567000 | 0.836871000  |
| 1 | 2.465780000  | -3.946802000 | 1.372998000  |
| 1 | 1.624627000  | -4.746664000 | 0.010850000  |
| 1 | 0.742098000  | -4.383687000 | 1.518148000  |
| 6 | -0.143161000 | -0.925473000 | -0.115007000 |

|    |              |              |              |
|----|--------------|--------------|--------------|
| 6  | 0.035035000  | 3.663830000  | 0.762925000  |
| 1  | 0.722250000  | 4.118136000  | 1.475064000  |
| 6  | -2.457003000 | -1.910431000 | -2.076706000 |
| 1  | -3.132788000 | -2.056627000 | -2.928528000 |
| 1  | -1.704534000 | -1.175927000 | -2.376830000 |
| 6  | -0.624568000 | 4.480054000  | -0.161048000 |
| 6  | -2.752606000 | 1.932171000  | -2.029030000 |
| 1  | -3.685238000 | 1.624667000  | -1.541122000 |
| 5  | -1.329826000 | 0.103011000  | -0.060981000 |
| 6  | 4.534457000  | -0.891465000 | 1.195641000  |
| 1  | 3.923355000  | -1.538174000 | 1.818771000  |
| 6  | 4.487131000  | -0.994033000 | -0.201067000 |
| 6  | 5.290676000  | -0.180701000 | -1.008182000 |
| 6  | 6.148906000  | 0.747049000  | -0.407494000 |
| 1  | 6.775699000  | 1.377828000  | -1.032151000 |
| 6  | 6.189433000  | 0.869677000  | 0.984301000  |
| 1  | 6.851883000  | 1.596425000  | 1.447169000  |
| 6  | 5.379188000  | 0.053863000  | 1.782596000  |
| 1  | 5.412148000  | 0.141668000  | 2.865530000  |
| 6  | -6.696410000 | -2.384863000 | 0.572552000  |
| 1  | -5.472027000 | -0.566248000 | 2.195333000  |
| 6  | -1.512367000 | 3.866107000  | -1.054547000 |
| 1  | -1.937807000 | -2.865021000 | -1.912109000 |
| 6  | -0.404140000 | 5.973673000  | -0.191138000 |
| 1  | -2.363876000 | 1.056913000  | -2.560286000 |
| 1  | -3.006761000 | 2.691001000  | -2.777033000 |
| 1  | 5.248112000  | -0.264419000 | -2.090444000 |
| 1  | -6.897693000 | -3.116751000 | -0.217068000 |
| 1  | -6.780102000 | -2.896303000 | 1.540400000  |
| 1  | -7.491341000 | -1.627592000 | 0.542215000  |
| 1  | -2.032943000 | 4.478906000  | -1.789396000 |
| 1  | -0.174365000 | 6.322097000  | -1.205953000 |
| 1  | 0.420160000  | 6.269103000  | 0.466790000  |
| 1  | -1.303904000 | 6.512694000  | 0.135671000  |
| 16 | 3.480721000  | -2.265370000 | -1.007751000 |

9-[F] [BC29N2H34SF]

HF = -1758.099327 Ha

NImag= 1 [methyl rotation of mesityl with  $-9.8 \text{ cm}^{-1}$ ]

|    |              |              |              |
|----|--------------|--------------|--------------|
| 16 | -3.715349000 | -2.047508000 | 0.893774000  |
| 9  | 1.313009000  | 0.058497000  | 2.103165000  |
| 7  | -1.262607000 | -0.709601000 | 0.827783000  |
| 7  | -1.417680000 | -2.341784000 | -0.609726000 |

|   |              |              |              |
|---|--------------|--------------|--------------|
| 6 | 1.321632000  | 1.705114000  | 0.251899000  |
| 6 | 2.637035000  | -0.797596000 | 0.075430000  |
| 6 | 4.927554000  | -2.357411000 | -0.759160000 |
| 6 | 3.095589000  | -1.927553000 | 0.820704000  |
| 6 | -2.100842000 | -1.649864000 | 0.326355000  |
| 6 | 4.450038000  | -1.291212000 | -1.524409000 |
| 6 | 2.294625000  | 2.528541000  | 0.898035000  |
| 6 | -1.645466000 | 0.238946000  | 1.879073000  |
| 1 | -2.651063000 | 0.615235000  | 1.686867000  |
| 1 | -0.939677000 | 1.065415000  | 1.869269000  |
| 1 | -1.616720000 | -0.254481000 | 2.854419000  |
| 6 | 3.334535000  | -0.525697000 | -1.136867000 |
| 6 | 4.216246000  | -2.666805000 | 0.403201000  |
| 1 | 4.533819000  | -3.519431000 | 1.003478000  |
| 6 | -0.670203000 | 1.673797000  | -1.415949000 |
| 1 | -0.310144000 | 0.771743000  | -1.918378000 |
| 1 | -1.063950000 | 2.346595000  | -2.186557000 |
| 1 | -1.520947000 | 1.375890000  | -0.791716000 |
| 6 | 0.411587000  | 2.376989000  | -0.611670000 |
| 6 | -0.142608000 | -1.831958000 | -0.678223000 |
| 1 | 0.578884000  | -2.253269000 | -1.361472000 |
| 6 | 2.934259000  | 0.577241000  | -2.102486000 |
| 1 | 1.860869000  | 0.579227000  | -2.310537000 |
| 1 | 3.456132000  | 0.449151000  | -3.058170000 |
| 1 | 3.187936000  | 1.573004000  | -1.722191000 |
| 6 | -1.915507000 | -3.476947000 | -1.391428000 |
| 1 | -2.864305000 | -3.217774000 | -1.864036000 |
| 1 | -2.047745000 | -4.349065000 | -0.746601000 |
| 1 | -1.174249000 | -3.699356000 | -2.159179000 |
| 6 | -0.014579000 | -0.788386000 | 0.213068000  |
| 6 | 0.472189000  | 3.772516000  | -0.789552000 |
| 1 | -0.239812000 | 4.245050000  | -1.465831000 |
| 6 | 2.420979000  | -2.434388000 | 2.086883000  |
| 1 | 2.655854000  | -1.812409000 | 2.958480000  |
| 1 | 1.330642000  | -2.453538000 | 2.000708000  |
| 6 | 1.416811000  | 4.570547000  | -0.141823000 |
| 6 | 3.355061000  | 1.980695000  | 1.839930000  |
| 1 | 3.738746000  | 1.008615000  | 1.521280000  |
| 5 | 1.327176000  | 0.083562000  | 0.615960000  |
| 6 | -4.643856000 | -0.414675000 | -1.208829000 |
| 1 | -3.870248000 | -0.852216000 | -1.833361000 |
| 6 | -4.762741000 | -0.776844000 | 0.138963000  |
| 6 | -5.769118000 | -0.223401000 | 0.939922000  |

|             |              |              |      |              |             |
|-------------|--------------|--------------|------|--------------|-------------|
| 6           | -6.664861000 | 0.696129000  | 0.31 | -7.446479000 | 1.124123000 |
| 1.005480000 |              |              |      |              |             |
| 6           | -6.544806000 | 1.073968000  |      | -0.957405000 |             |
| 1           | -7.236535000 | 1.795191000  |      | -1.384507000 |             |
| 6           | -5.530630000 | 0.521355000  |      | -1.747801000 |             |
| 1           | -5.433406000 | 0.808320000  |      | -2.791877000 |             |
| 6           | 6.156088000  | -3.138686000 |      | -1.165956000 |             |
| 1           | 4.954225000  | -1.046213000 |      | -2.458915000 |             |
| 6           | 2.328961000  | 3.917271000  |      | 0.691567000  |             |
| 1           | 2.759118000  | -3.453823000 |      | 2.307037000  |             |
| 6           | 1.446889000  | 6.071338000  |      | -0.322079000 |             |
| 1           | 2.962867000  | 1.848873000  |      | 2.856160000  |             |
| 1           | 4.200948000  | 2.675829000  |      | 1.905000000  |             |
| 1           | -5.853348000 | -0.499862000 |      | 1.987781000  |             |
| 1           | 6.081396000  | -4.191120000 |      | -0.866618000 |             |
| 1           | 6.314755000  | -3.102757000 |      | -2.250227000 |             |
| 1           | 7.061811000  | -2.733489000 |      | -0.692208000 |             |
| 1           | 3.097586000  | 4.503638000  |      | 1.196163000  |             |
| 1           | 0.975989000  | 6.585612000  |      | 0.528018000  |             |
| 1           | 0.908000000  | 6.376413000  |      | -1.226656000 |             |
| 1           | 2.474531000  | 6.448287000  |      | -0.394256000 |             |

9-[CN] [BC30N3H34S]

HF = -1751.0643175 Ha

NImag= 0

|    |              |              |  |              |  |
|----|--------------|--------------|--|--------------|--|
| 16 | -3.773356000 | -2.003350000 |  | 0.946384000  |  |
| 6  | 1.373903000  | 0.117243000  |  | 2.244432000  |  |
| 7  | -1.304368000 | -0.692257000 |  | 0.887412000  |  |
| 7  | -1.431207000 | -2.398581000 |  | -0.464596000 |  |
| 6  | 1.309005000  | 1.697973000  |  | 0.226861000  |  |
| 6  | 2.595212000  | -0.820967000 |  | -0.001167000 |  |
| 6  | 4.849395000  | -2.327472000 |  | -1.017267000 |  |
| 6  | 3.107898000  | -1.969203000 |  | 0.676777000  |  |
| 6  | -2.132929000 | -1.657001000 |  | 0.416345000  |  |
| 6  | 4.302837000  | -1.256588000 |  | -1.727315000 |  |
| 6  | 2.358733000  | 2.526755000  |  | 0.728299000  |  |
| 6  | -1.719436000 | 0.306768000  |  | 1.878325000  |  |
| 1  | -2.738502000 | 0.630412000  |  | 1.665254000  |  |
| 1  | -1.053070000 | 1.163551000  |  | 1.813561000  |  |
| 1  | -1.670521000 | -0.121337000 |  | 2.882828000  |  |
| 6  | 3.201258000  | -0.519088000 |  | -1.257393000 |  |
| 6  | 4.211056000  | -2.680411000 |  | 0.173061000  |  |
| 1  | 4.569880000  | -3.547308000 |  | 0.727639000  |  |

|   |              |              |              |
|---|--------------|--------------|--------------|
| 6 | -0.821303000 | 1.644778000  | -1.273382000 |
| 1 | -0.513458000 | 0.702089000  | -1.731952000 |
| 1 | -1.217928000 | 2.284993000  | -2.069516000 |
| 1 | -1.659907000 | 1.421588000  | -0.603976000 |
| 6 | 0.318111000  | 2.354805000  | -0.560747000 |
| 6 | -0.154960000 | -1.894769000 | -0.534986000 |
| 1 | 0.578363000  | -2.351984000 | -1.180653000 |
| 6 | 2.706648000  | 0.566246000  | -2.198238000 |
| 1 | 1.618614000  | 0.562849000  | -2.298582000 |
| 1 | 3.131370000  | 0.413737000  | -3.197372000 |
| 1 | 2.995907000  | 1.570431000  | -1.869690000 |
| 6 | -1.909800000 | -3.576504000 | -1.194412000 |
| 1 | -2.871809000 | -3.359980000 | -1.661035000 |
| 1 | -2.009069000 | -4.424906000 | -0.512704000 |
| 1 | -1.174215000 | -3.809129000 | -1.964512000 |
| 6 | -0.041816000 | -0.805169000 | 0.301467000  |
| 6 | 0.365668000  | 3.744922000  | -0.770819000 |
| 1 | -0.408191000 | 4.204745000  | -1.385025000 |
| 6 | 2.509230000  | -2.538295000 | 1.952766000  |
| 1 | 2.872064000  | -2.020933000 | 2.848799000  |
| 1 | 1.417280000  | -2.483097000 | 1.970065000  |
| 6 | 1.373910000  | 4.553898000  | -0.242429000 |
| 6 | 3.538965000  | 2.004005000  | 1.532547000  |
| 1 | 3.784150000  | 0.964276000  | 1.308755000  |
| 5 | 1.320157000  | 0.069218000  | 0.620220000  |
| 6 | -4.646428000 | -0.575333000 | -1.316052000 |
| 1 | -3.920407000 | -1.141084000 | -1.893000000 |
| 6 | -4.760051000 | -0.762744000 | 0.067577000  |
| 6 | -5.708491000 | -0.048162000 | 0.809212000  |
| 6 | -6.550822000 | 0.859230000  | 0.156991000  |
| 1 | -7.288344000 | 1.412420000  | 0.732741000  |
| 6 | -6.433359000 | 1.064205000  | -1.220610000 |
| 1 | -7.082721000 | 1.776468000  | -1.722876000 |
| 6 | -5.477758000 | 0.349841000  | -1.952800000 |
| 1 | -5.384448000 | 0.502033000  | -3.025093000 |
| 6 | 6.063110000  | -3.075277000 | -1.518679000 |
| 1 | 4.736822000  | -0.988025000 | -2.690137000 |
| 6 | 2.374321000  | 3.910786000  | 0.488886000  |
| 1 | 2.787859000  | -3.593674000 | 2.053825000  |
| 6 | 1.382326000  | 6.050669000  | -0.451739000 |
| 1 | 3.351173000  | 2.068058000  | 2.612331000  |
| 1 | 4.429903000  | 2.609217000  | 1.325820000  |
| 1 | -5.788539000 | -0.191520000 | 1.883387000  |
| 1 | 6.037307000  | -4.129742000 | -1.218948000 |



|   |             |              |              |
|---|-------------|--------------|--------------|
| 1 | 6.138538000 | -3.031018000 | -2.611581000 |
| 1 | 6.990051000 | -2.646182000 | -1.111850000 |
| 1 | 3.202829000 | 4.499088000  | 0.883751000  |
| 1 | 0.907751000 | 6.572900000  | 0.391432000  |
| 1 | 0.833234000 | 6.331776000  | -1.358017000 |
| 1 | 2.404464000 | 6.438920000  | -0.536314000 |
| 7 | 1.344131000 | 0.226129000  | 3.406659000  |

**10 [BC29N2H34Se+1]**

HF = -3659.3109464 Ha

NImag= 0

|   |              |              |              |
|---|--------------|--------------|--------------|
| 7 | 0.921856000  | -0.640983000 | -0.486820000 |
| 7 | 1.000603000  | -2.488393000 | 0.674265000  |
| 6 | -1.454850000 | 1.697536000  | -0.084606000 |
| 6 | -2.994152000 | -0.615284000 | 0.092535000  |
| 6 | -5.496016000 | -1.984981000 | 0.252876000  |
| 6 | -3.329515000 | -1.636154000 | -0.837512000 |
| 6 | 1.720964000  | -1.659435000 | -0.118690000 |
| 6 | -5.155851000 | -0.986210000 | 1.175741000  |
| 6 | -2.164386000 | 2.443784000  | -1.069902000 |
| 6 | 1.315002000  | 0.430214000  | -1.406798000 |
| 1 | 1.716392000  | 1.279253000  | -0.849199000 |
| 1 | 0.439141000  | 0.741156000  | -1.973829000 |
| 1 | 2.073019000  | 0.045792000  | -2.090259000 |
| 6 | -3.942156000 | -0.292488000 | 1.105086000  |
| 6 | -4.571381000 | -2.283737000 | -0.752250000 |
| 1 | -4.819787000 | -3.042975000 | -1.492612000 |
| 6 | 0.164249000  | 1.729227000  | 1.924274000  |
| 1 | -0.416152000 | 0.964021000  | 2.450062000  |
| 1 | 0.498742000  | 2.462288000  | 2.666282000  |
| 1 | 1.062873000  | 1.239827000  | 1.528451000  |
| 6 | -0.629931000 | 2.412884000  | 0.827300000  |
| 6 | -0.269928000 | -1.992084000 | 0.780781000  |
| 1 | -1.022052000 | -2.501789000 | 1.364358000  |
| 6 | -3.679259000 | 0.782457000  | 2.141560000  |
| 1 | -2.692833000 | 0.678194000  | 2.606266000  |
| 1 | -4.429350000 | 0.738256000  | 2.938851000  |
| 1 | -3.724127000 | 1.786094000  | 1.701533000  |
| 6 | 1.484846000  | -3.724562000 | 1.299567000  |
| 1 | 2.370981000  | -3.507017000 | 1.898501000  |
| 1 | 1.729707000  | -4.459988000 | 0.530502000  |
| 1 | 0.687435000  | -4.107394000 | 1.936765000  |
| 6 | -0.350090000 | -0.810385000 | 0.077170000  |

|    |              |              |              |
|----|--------------|--------------|--------------|
| 6  | -0.546974000 | 3.811134000  | 0.752083000  |
| 1  | 0.071676000  | 4.339772000  | 1.475573000  |
| 6  | -2.407858000 | -2.053693000 | -1.970581000 |
| 1  | -2.993442000 | -2.435932000 | -2.814739000 |
| 1  | -1.789194000 | -1.231912000 | -2.342911000 |
| 6  | -1.230635000 | 4.544770000  | -0.222183000 |
| 6  | -3.065461000 | 1.781657000  | -2.094037000 |
| 1  | -3.997907000 | 1.425762000  | -1.639519000 |
| 5  | -1.603161000 | 0.130566000  | 0.007509000  |
| 6  | 4.467069000  | -0.150572000 | 1.307759000  |
| 1  | 3.976041000  | -0.790781000 | 2.034587000  |
| 6  | 4.395684000  | -0.444703000 | -0.057983000 |
| 6  | 5.048756000  | 0.355306000  | -0.999930000 |
| 6  | 5.777487000  | 1.468447000  | -0.566532000 |
| 1  | 6.287242000  | 2.092666000  | -1.296086000 |
| 6  | 5.842440000  | 1.780632000  | 0.794918000  |
| 1  | 6.405873000  | 2.648449000  | 1.127811000  |
| 6  | 5.185126000  | 0.971917000  | 1.729565000  |
| 1  | 5.238621000  | 1.207027000  | 2.789627000  |
| 6  | -6.813065000 | -2.717096000 | 0.354391000  |
| 1  | -5.859366000 | -0.736022000 | 1.968783000  |
| 6  | -2.028207000 | 3.835586000  | -1.130044000 |
| 1  | -1.727247000 | -2.857006000 | -1.659483000 |
| 6  | -1.122580000 | 6.049169000  | -0.296336000 |
| 1  | -2.589426000 | 0.917934000  | -2.569963000 |
| 1  | -3.333830000 | 2.492040000  | -2.883575000 |
| 1  | 4.987029000  | 0.119609000  | -2.058284000 |
| 1  | -7.006838000 | -3.317482000 | -0.541081000 |
| 1  | -6.821663000 | -3.395037000 | 1.219061000  |
| 1  | -7.649135000 | -2.019171000 | 0.487051000  |
| 1  | -2.564339000 | 4.383121000  | -1.904203000 |
| 1  | -0.769767000 | 6.374114000  | -1.283788000 |
| 1  | -0.428752000 | 6.437377000  | 0.457000000  |
| 1  | -2.098819000 | 6.525250000  | -0.134076000 |
| 34 | 3.495643000  | -2.050080000 | -0.677837000 |

**10-[F] [BC29N2H34SeF]**

HF = -3759.3341711 Ha

NImag= 1 [methyl rotation of mesityl with -3.3 cm<sup>-1</sup>]

|    |              |              |              |
|----|--------------|--------------|--------------|
| 34 | -3.718917000 | -1.727531000 | 0.897487000  |
| 9  | 1.617655000  | -0.001418000 | 2.115177000  |
| 7  | -1.038753000 | -0.566401000 | 0.834853000  |
| 7  | -1.275382000 | -2.214222000 | -0.567818000 |

|   |              |              |              |
|---|--------------|--------------|--------------|
| 6 | 1.649159000  | 1.702896000  | 0.314591000  |
| 6 | 2.857167000  | -0.834622000 | 0.016594000  |
| 6 | 5.068577000  | -2.422723000 | -0.966326000 |
| 6 | 3.342173000  | -1.977190000 | 0.724719000  |
| 6 | -1.924460000 | -1.458544000 | 0.337723000  |
| 6 | 4.559826000  | -1.345652000 | -1.695120000 |
| 6 | 2.677227000  | 2.463471000  | 0.954216000  |
| 6 | -1.383699000 | 0.413139000  | 1.869858000  |
| 1 | -2.245803000 | 1.001600000  | 1.549380000  |
| 1 | -0.527481000 | 1.062468000  | 2.027510000  |
| 1 | -1.625389000 | -0.106945000 | 2.800658000  |
| 6 | 3.481472000  | -0.567780000 | -1.236274000 |
| 6 | 4.424503000  | -2.729492000 | 0.235413000  |
| 1 | 4.764204000  | -3.591683000 | 0.809553000  |
| 6 | -0.394783000 | 1.814442000  | -1.290104000 |
| 1 | -0.116505000 | 0.874897000  | -1.772595000 |
| 1 | -0.730747000 | 2.502688000  | -2.074476000 |
| 1 | -1.266953000 | 1.606735000  | -0.658926000 |
| 6 | 0.745024000  | 2.439917000  | -0.501101000 |
| 6 | 0.031644000  | -1.785567000 | -0.631998000 |
| 1 | 0.732978000  | -2.265085000 | -1.297430000 |
| 6 | 3.033419000  | 0.540191000  | -2.174359000 |
| 1 | 1.948071000  | 0.566843000  | -2.297531000 |
| 1 | 3.475087000  | 0.393728000  | -3.166859000 |
| 1 | 3.339598000  | 1.531806000  | -1.822968000 |
| 6 | -1.835598000 | -3.339843000 | -1.320279000 |
| 1 | -2.743149000 | -3.025863000 | -1.838516000 |
| 1 | -2.068816000 | -4.163297000 | -0.641292000 |
| 1 | -1.087978000 | -3.660476000 | -2.046569000 |
| 6 | 0.212319000  | -0.732661000 | 0.237443000  |
| 6 | 0.863789000  | 3.836500000  | -0.640133000 |
| 1 | 0.153903000  | 4.360321000  | -1.279330000 |
| 6 | 2.733089000  | -2.484588000 | 2.023388000  |
| 1 | 3.009180000  | -1.861958000 | 2.882151000  |
| 1 | 1.640238000  | -2.505821000 | 1.990012000  |
| 6 | 1.864403000  | 4.572066000  | -0.003399000 |
| 6 | 3.737002000  | 1.841929000  | 1.850693000  |
| 1 | 4.078455000  | 0.870569000  | 1.485714000  |
| 5 | 1.596038000  | 0.070548000  | 0.627664000  |
| 6 | -4.486403000 | -0.223444000 | -1.488524000 |
| 1 | -3.904395000 | -0.958701000 | -2.036488000 |
| 6 | -4.573737000 | -0.287764000 | -0.093295000 |
| 6 | -5.336563000 | 0.644045000  | 0.617430000  |
| 6 | -6.016191000 | 1.651285000  | -0.078092000 |

|   |              |              |              |
|---|--------------|--------------|--------------|
| 1 | -6.609484000 | 2.376794000  | 0.473022000  |
| 6 | -5.923267000 | 1.731606000  | -1.471052000 |
| 1 | -6.446921000 | 2.518196000  | -2.007636000 |
| 6 | -5.155095000 | 0.794817000  | -2.173332000 |
| 1 | -5.082584000 | 0.849614000  | -3.256881000 |
| 6 | 6.256904000  | -3.219195000 | -1.454870000 |
| 1 | 5.007921000  | -1.103199000 | -2.658726000 |
| 6 | 2.770035000  | 3.853999000  | 0.783955000  |
| 1 | 3.084406000  | -3.503816000 | 2.226487000  |
| 6 | 1.966328000  | 6.073143000  | -0.151297000 |
| 1 | 3.360965000  | 1.682924000  | 2.868943000  |
| 1 | 4.608240000  | 2.503947000  | 1.923092000  |
| 1 | -5.396058000 | 0.592224000  | 1.700904000  |
| 1 | 6.191344000  | -4.269543000 | -1.146307000 |
| 1 | 6.338084000  | -3.188202000 | -2.547932000 |
| 1 | 7.197824000  | -2.821619000 | -1.048645000 |
| 1 | 3.579634000  | 4.390224000  | 1.279703000  |
| 1 | 1.616905000  | 6.589378000  | 0.754073000  |
| 1 | 1.359624000  | 6.433880000  | -0.989750000 |
| 1 | 3.003067000  | 6.391517000  | -0.319863000 |

**10-[CN] [BC30N3H34Se]**

HF = -3752.2995694 Ha

NImag= 0

|    |              |              |              |
|----|--------------|--------------|--------------|
| 34 | -3.752149000 | -1.722516000 | 0.847752000  |
| 6  | 1.628650000  | 0.051288000  | 2.227437000  |
| 7  | -1.080641000 | -0.553820000 | 0.805113000  |
| 7  | -1.279366000 | -2.210455000 | -0.594508000 |
| 6  | 1.656870000  | 1.704622000  | 0.265515000  |
| 6  | 2.820362000  | -0.866577000 | -0.041270000 |
| 6  | 5.007250000  | -2.447115000 | -1.091658000 |
| 6  | 3.265857000  | -2.064203000 | 0.597402000  |
| 6  | -1.953377000 | -1.451285000 | 0.291561000  |
| 6  | 4.523321000  | -1.324447000 | -1.766441000 |
| 6  | 2.741044000  | 2.463550000  | 0.803269000  |
| 6  | -1.450825000 | 0.429638000  | 1.828529000  |
| 1  | -2.422170000 | 0.861433000  | 1.586947000  |
| 1  | -0.703204000 | 1.218866000  | 1.843386000  |
| 1  | -1.497845000 | -0.052599000 | 2.808202000  |
| 6  | 3.455216000  | -0.549768000 | -1.279501000 |
| 6  | 4.338353000  | -2.810852000 | 0.078415000  |

|   |              |              |              |
|---|--------------|--------------|--------------|
| 1 | 4.646916000  | -3.714433000 | 0.603898000  |
| 6 | -0.463371000 | 1.810246000  | -1.250610000 |
| 1 | -0.204719000 | 0.864265000  | -1.731910000 |
| 1 | -0.812503000 | 2.493366000  | -2.033337000 |
| 1 | -1.321891000 | 1.618908000  | -0.597020000 |
| 6 | 0.706064000  | 2.435708000  | -0.506736000 |
| 6 | 0.027311000  | -1.780312000 | -0.628651000 |
| 1 | 0.743977000  | -2.259777000 | -1.277160000 |
| 6 | 3.026357000  | 0.593150000  | -2.183978000 |
| 1 | 1.940879000  | 0.644996000  | -2.298719000 |
| 1 | 3.458322000  | 0.458777000  | -3.182637000 |
| 1 | 3.357088000  | 1.569310000  | -1.812945000 |
| 6 | -1.792464000 | -3.318205000 | -1.403337000 |
| 1 | -2.852828000 | -3.453242000 | -1.196062000 |
| 1 | -1.246416000 | -4.229831000 | -1.148112000 |
| 1 | -1.645920000 | -3.085904000 | -2.460978000 |
| 6 | 0.187205000  | -0.724779000 | 0.239598000  |
| 6 | 0.823689000  | 3.828137000  | -0.667704000 |
| 1 | 0.079039000  | 4.346701000  | -1.271233000 |
| 6 | 2.626373000  | -2.648529000 | 1.846434000  |
| 1 | 3.006510000  | -2.183464000 | 2.763872000  |
| 1 | 1.538655000  | -2.538181000 | 1.857219000  |
| 6 | 1.865380000  | 4.568243000  | -0.104339000 |
| 6 | 3.886861000  | 1.855453000  | 1.597108000  |
| 1 | 4.084638000  | 0.814288000  | 1.336375000  |
| 5 | 1.585455000  | 0.064186000  | 0.602144000  |
| 6 | -4.547455000 | -0.223030000 | -1.531222000 |
| 1 | -3.984877000 | -0.968128000 | -2.086066000 |
| 6 | -4.608773000 | -0.278533000 | -0.134785000 |
| 6 | -5.347652000 | 0.664626000  | 0.585937000  |
| 6 | -6.028651000 | 1.676020000  | -0.101584000 |
| 1 | -6.602744000 | 2.410975000  | 0.457030000  |
| 6 | -5.961872000 | 1.747598000  | -1.496271000 |
| 1 | -6.487188000 | 2.537449000  | -2.026870000 |
| 6 | -5.219139000 | 0.798429000  | -2.208738000 |
| 1 | -5.168090000 | 0.846421000  | -3.293657000 |
| 6 | 6.188227000  | -3.235645000 | -1.608623000 |
| 1 | 4.981045000  | -1.043228000 | -2.714415000 |
| 6 | 2.826421000  | 3.852500000  | 0.611965000  |
| 1 | 2.850584000  | -3.719694000 | 1.910360000  |
| 6 | 1.948698000  | 6.068977000  | -0.263354000 |
| 1 | 3.691668000  | 1.888118000  | 2.676967000  |
| 1 | 4.807850000  | 2.424457000  | 1.420856000  |
| 1 | -5.386858000 | 0.618755000  | 1.670450000  |

|   |             |              |              |
|---|-------------|--------------|--------------|
| 1 | 6.112231000 | -4.295836000 | -1.339293000 |
| 1 | 6.271915000 | -3.164042000 | -2.699501000 |
| 1 | 7.131626000 | -2.861299000 | -1.185937000 |
| 1 | 3.678881000 | 4.385889000  | 1.033104000  |
| 1 | 1.477567000 | 6.585842000  | 0.585076000  |
| 1 | 1.436191000 | 6.404756000  | -1.172550000 |
| 1 | 2.989592000 | 6.410834000  | -0.310710000 |
| 7 | 1.594619000 | 0.115768000  | 3.392948000  |

1'-[F] [BC22N2H27F-1]

HF = -1089.0723928 Ha

NImag= 0

|   |              |              |              |
|---|--------------|--------------|--------------|
| 9 | 0.026898000  | 0.723215000  | 1.951427000  |
| 6 | 3.564654000  | -0.831440000 | -0.858736000 |
| 1 | 4.317740000  | -0.549144000 | -1.594439000 |
| 6 | 2.397804000  | -0.048542000 | -0.751518000 |
| 6 | 1.375832000  | -0.373056000 | 0.187171000  |
| 6 | -1.442051000 | -0.313155000 | 0.098439000  |
| 6 | 3.788510000  | -1.960439000 | -0.069236000 |
| 6 | 2.784679000  | -2.298089000 | 0.843066000  |
| 1 | 2.912279000  | -3.184984000 | 1.464801000  |
| 6 | 1.612701000  | -1.537032000 | 0.984208000  |
| 6 | -2.618434000 | -0.126750000 | 0.889781000  |
| 6 | 2.327849000  | 1.127421000  | -1.713418000 |
| 1 | 3.115391000  | 1.040393000  | -2.471691000 |
| 6 | 1.610719000  | 3.185010000  | 1.275523000  |
| 1 | 1.158433000  | 3.117017000  | 2.268947000  |
| 1 | 2.330835000  | 2.371688000  | 1.162213000  |
| 6 | -3.805626000 | -0.823179000 | 0.605070000  |
| 1 | -4.677334000 | -0.653108000 | 1.237587000  |
| 6 | -2.792915000 | -1.848814000 | -1.286195000 |
| 6 | -1.586031000 | -1.170519000 | -1.029489000 |
| 6 | 0.637420000  | -2.041070000 | 2.036531000  |
| 1 | -0.405178000 | -1.919863000 | 1.736789000  |
| 1 | 0.812951000  | -3.105252000 | 2.238127000  |
| 1 | 0.757913000  | -1.506383000 | 2.986993000  |
| 6 | -3.915514000 | -1.711866000 | -0.468754000 |
| 6 | -2.694865000 | 0.836514000  | 2.065297000  |
| 1 | -2.235176000 | 1.802644000  | 1.836177000  |
| 1 | -3.742615000 | 1.015992000  | 2.334665000  |
| 1 | -2.185126000 | 0.449474000  | 2.954990000  |
| 6 | -0.482038000 | -1.402248000 | -2.048060000 |
| 1 | 0.291307000  | -2.086473000 | -1.679551000 |

|   |              |              |              |
|---|--------------|--------------|--------------|
| 1 | 5.740784000  | -2.573965000 | 0.652687000  |
| 5 | -0.024818000 | 0.493543000  | 0.471709000  |
| 6 | 5.056839000  | -2.776060000 | -0.183785000 |
| 1 | 2.474758000  | 2.088163000  | -1.207422000 |
| 1 | 1.369956000  | 1.193564000  | -2.236595000 |
| 1 | 2.135748000  | 4.139648000  | 1.185500000  |
| 7 | 0.592212000  | 3.113687000  | 0.233580000  |
| 1 | -2.853976000 | -2.496063000 | -2.160595000 |
| 6 | -5.194341000 | -2.472843000 | -0.737446000 |
| 1 | 0.021154000  | -0.475056000 | -2.333284000 |
| 1 | -0.899123000 | -1.845322000 | -2.960764000 |
| 6 | -0.142558000 | 1.994541000  | -0.166630000 |
| 1 | 5.597371000  | -2.547540000 | -1.109459000 |
| 1 | 4.846791000  | -3.853063000 | -0.170468000 |
| 6 | 0.177102000  | 4.188256000  | -0.494699000 |
| 1 | -6.077896000 | -1.833801000 | -0.612676000 |
| 1 | -5.312625000 | -3.319409000 | -0.046060000 |
| 1 | -5.210677000 | -2.878367000 | -1.756046000 |
| 6 | -0.984603000 | 2.510705000  | -1.138993000 |
| 1 | 0.602059000  | 5.174417000  | -0.353650000 |
| 7 | -0.781434000 | 3.863922000  | -1.348829000 |
| 1 | -1.729980000 | 1.970801000  | -1.710212000 |

1'-[CN] [BC23N3H27-1]

HF = -1082.0392659 Ha

NImag= 0

|   |              |              |              |
|---|--------------|--------------|--------------|
| 6 | 0.092313000  | 0.772225000  | 2.010387000  |
| 6 | 3.565371000  | -0.824382000 | -0.913813000 |
| 1 | 4.310172000  | -0.532378000 | -1.654059000 |
| 6 | 2.386472000  | -0.063006000 | -0.811773000 |
| 6 | 1.371870000  | -0.401319000 | 0.134071000  |
| 6 | -1.463447000 | -0.334881000 | 0.069079000  |
| 6 | 3.810950000  | -1.948298000 | -0.121637000 |
| 6 | 2.803567000  | -2.314620000 | 0.772178000  |
| 1 | 2.935911000  | -3.208723000 | 1.382020000  |
| 6 | 1.616226000  | -1.575368000 | 0.910576000  |
| 6 | -2.671282000 | -0.067212000 | 0.783290000  |
| 6 | 2.285887000  | 1.080656000  | -1.808862000 |
| 1 | 3.018078000  | 0.938006000  | -2.612279000 |
| 6 | 1.658332000  | 3.270944000  | 0.973881000  |
| 1 | 1.256878000  | 3.417750000  | 1.980728000  |
| 1 | 2.303439000  | 2.390696000  | 0.977095000  |
| 6 | -3.854031000 | -0.777543000 | 0.511201000  |

|   |              |              |              |
|---|--------------|--------------|--------------|
| 1 | -4.749370000 | -0.540219000 | 1.085909000  |
| 6 | -2.773950000 | -1.969014000 | -1.237530000 |
| 6 | -1.571484000 | -1.280702000 | -0.994083000 |
| 6 | 0.634749000  | -2.136500000 | 1.928666000  |
| 1 | -0.403482000 | -1.883223000 | 1.708573000  |
| 1 | 0.712983000  | -3.230208000 | 1.961294000  |
| 1 | 0.850518000  | -1.769582000 | 2.940757000  |
| 6 | -3.927988000 | -1.757933000 | -0.480048000 |
| 6 | -2.799498000 | 1.007171000  | 1.850834000  |
| 1 | -2.228899000 | 1.907977000  | 1.608534000  |
| 1 | -3.850616000 | 1.299440000  | 1.960241000  |
| 1 | -2.456001000 | 0.661955000  | 2.833359000  |
| 6 | -0.444625000 | -1.594429000 | -1.964028000 |
| 1 | 0.314266000  | -2.253363000 | -1.527602000 |
| 1 | 5.856158000  | -2.344664000 | 0.478297000  |
| 5 | -0.037641000 | 0.477674000  | 0.414512000  |
| 6 | 5.102886000  | -2.726063000 | -0.226196000 |
| 1 | 2.499000000  | 2.054029000  | -1.353195000 |
| 1 | 1.297259000  | 1.155565000  | -2.267478000 |
| 1 | 2.252311000  | 4.145416000  | 0.695615000  |
| 7 | 0.583303000  | 3.107153000  | 0.000480000  |
| 1 | -2.808072000 | -2.683296000 | -2.060090000 |
| 6 | -5.195830000 | -2.542548000 | -0.728455000 |
| 1 | 0.071336000  | -0.693278000 | -2.304001000 |
| 1 | -0.846588000 | -2.100297000 | -2.850028000 |
| 6 | -0.166325000 | 1.959012000  | -0.277711000 |
| 1 | 5.534840000  | -2.653401000 | -1.231468000 |
| 1 | 4.952713000  | -3.787327000 | 0.005714000  |
| 6 | 0.130100000  | 4.118931000  | -0.792194000 |
| 1 | -6.086896000 | -1.957810000 | -0.470422000 |
| 1 | -5.223174000 | -3.458828000 | -0.121125000 |
| 1 | -5.279663000 | -2.848589000 | -1.778120000 |
| 6 | -1.055673000 | 2.398216000  | -1.246313000 |
| 1 | 0.562554000  | 5.111049000  | -0.755038000 |
| 7 | -0.867214000 | 3.729033000  | -1.570085000 |
| 1 | -1.822018000 | 1.814584000  | -1.740273000 |
| 7 | 0.284918000  | 1.006717000  | 3.138943000  |

4'-[F] [BC23N2H30F]

HF = -1128.8558837 Ha

NImag= 0

|   |             |              |              |
|---|-------------|--------------|--------------|
| 6 | 3.732994000 | -0.108868000 | -0.982166000 |
| 1 | 4.358727000 | 0.417953000  | -1.702397000 |



|   |              |              |              |
|---|--------------|--------------|--------------|
| 6 | 2.423967000  | 0.359192000  | -0.754529000 |
| 6 | 1.559674000  | -0.293924000 | 0.169468000  |
| 6 | -1.213688000 | -0.854609000 | 0.164706000  |
| 6 | 4.255102000  | -1.227025000 | -0.330280000 |
| 6 | 3.407338000  | -1.886941000 | 0.564637000  |
| 1 | 3.770682000  | -2.777947000 | 1.077568000  |
| 6 | 2.099716000  | -1.445773000 | 0.822237000  |
| 6 | -2.372655000 | -0.986276000 | 0.990787000  |
| 6 | 2.027872000  | 1.576020000  | -1.576222000 |
| 1 | 2.755745000  | 1.740200000  | -2.379272000 |
| 6 | 1.066867000  | 3.038585000  | 1.721795000  |
| 1 | 0.672947000  | 2.749864000  | 2.698004000  |
| 1 | 1.915169000  | 2.401072000  | 1.471525000  |
| 6 | -3.414327000 | -1.865215000 | 0.646839000  |
| 1 | -4.278619000 | -1.935587000 | 1.307420000  |
| 6 | -2.287443000 | -2.473219000 | -1.358167000 |
| 6 | -1.224264000 | -1.605670000 | -1.045684000 |
| 6 | 1.317429000  | -2.275792000 | 1.828028000  |
| 1 | 0.261979000  | -2.371084000 | 1.562788000  |
| 1 | 1.743110000  | -3.284032000 | 1.900319000  |
| 1 | 1.353438000  | -1.833486000 | 2.831489000  |
| 6 | -3.388932000 | -2.639510000 | -0.516659000 |
| 6 | -2.589182000 | -0.191247000 | 2.269593000  |
| 1 | -2.344387000 | 0.868162000  | 2.146669000  |
| 1 | -3.638563000 | -0.261757000 | 2.580428000  |
| 1 | -1.972888000 | -0.561010000 | 3.096889000  |
| 6 | -0.124301000 | -1.521139000 | -2.090641000 |
| 1 | 0.785431000  | -2.046634000 | -1.779044000 |
| 1 | 6.322541000  | -1.466336000 | 0.280484000  |
| 5 | 0.022786000  | 0.178952000  | 0.599784000  |
| 6 | 5.669977000  | -1.701980000 | -0.572123000 |
| 1 | 2.006299000  | 2.493221000  | -0.975454000 |
| 1 | 1.042724000  | 1.474711000  | -2.039082000 |
| 1 | 1.387208000  | 4.081731000  | 1.746406000  |
| 7 | 0.027846000  | 2.891944000  | 0.699129000  |
| 1 | -2.251712000 | -3.028636000 | -2.295260000 |
| 6 | -4.501489000 | -3.608390000 | -0.846640000 |
| 1 | 0.162720000  | -0.489359000 | -2.309769000 |
| 1 | -0.460810000 | -1.977679000 | -3.029151000 |
| 6 | -0.453500000 | 1.689843000  | 0.156868000  |
| 1 | 6.104419000  | -1.227236000 | -1.459408000 |
| 1 | 5.711312000  | -2.789408000 | -0.714219000 |
| 6 | -0.622356000 | 3.933682000  | 0.164216000  |
| 1 | -5.476629000 | -3.228984000 | -0.517617000 |

|   |              |              |              |
|---|--------------|--------------|--------------|
| 1 | -4.348375000 | -4.576531000 | -0.348416000 |
| 1 | -4.556502000 | -3.803287000 | -1.924145000 |
| 6 | -1.433468000 | 2.089493000  | -0.719793000 |
| 1 | -0.457203000 | 4.973525000  | 0.404467000  |
| 7 | -1.518771000 | 3.471798000  | -0.710294000 |
| 1 | -2.077820000 | 1.505671000  | -1.359532000 |
| 6 | -2.437207000 | 4.281693000  | -1.510623000 |
| 1 | -2.288532000 | 5.333731000  | -1.263625000 |
| 1 | -3.466603000 | 3.993116000  | -1.284154000 |
| 1 | -2.234969000 | 4.120527000  | -2.572521000 |
| 9 | 0.092551000  | 0.262996000  | 2.083771000  |

4'-[CN] [BC24N3H30]

HF = -1121.8211859 Ha

NImag= 0

|   |              |              |              |
|---|--------------|--------------|--------------|
| 6 | 0.161353000  | 0.296796000  | 2.175133000  |
| 6 | 3.715068000  | -0.089309000 | -1.056819000 |
| 1 | 4.328800000  | 0.450249000  | -1.777905000 |
| 6 | 2.407639000  | 0.367913000  | -0.813683000 |
| 6 | 1.555730000  | -0.304437000 | 0.113795000  |
| 6 | -1.231211000 | -0.852289000 | 0.135927000  |
| 6 | 4.250267000  | -1.217357000 | -0.429780000 |
| 6 | 3.406294000  | -1.908965000 | 0.439852000  |
| 1 | 3.769413000  | -2.818809000 | 0.917970000  |
| 6 | 2.096584000  | -1.480433000 | 0.716238000  |
| 6 | -2.430072000 | -0.935817000 | 0.908417000  |
| 6 | 1.993110000  | 1.569087000  | -1.649214000 |
| 1 | 2.677928000  | 1.684737000  | -2.497012000 |
| 6 | 1.135306000  | 3.172908000  | 1.459823000  |
| 1 | 0.771747000  | 3.092254000  | 2.486235000  |
| 1 | 1.925781000  | 2.440911000  | 1.296699000  |
| 6 | -3.454583000 | -1.836741000 | 0.568791000  |
| 1 | -4.348747000 | -1.868121000 | 1.191087000  |
| 6 | -2.242038000 | -2.543570000 | -1.348735000 |
| 6 | -1.194204000 | -1.656734000 | -1.042087000 |
| 6 | 1.323860000  | -2.372489000 | 1.675780000  |
| 1 | 0.244564000  | -2.340581000 | 1.516774000  |
| 1 | 1.647773000  | -3.414020000 | 1.560870000  |
| 1 | 1.506030000  | -2.093574000 | 2.721863000  |
| 6 | -3.375433000 | -2.676013000 | -0.544050000 |
| 6 | -2.720724000 | -0.061270000 | 2.117160000  |
| 1 | -2.364981000 | 0.965104000  | 1.991183000  |
| 1 | -3.802053000 | -0.017152000 | 2.292180000  |

|   |              |              |              |
|---|--------------|--------------|--------------|
| 1 | -2.260582000 | -0.451267000 | 3.032809000  |
| 6 | -0.074682000 | -1.606760000 | -2.067889000 |
| 1 | 0.825514000  | -2.132985000 | -1.731993000 |
| 1 | 6.379054000  | -1.132682000 | -0.031799000 |
| 5 | 0.013965000  | 0.184335000  | 0.560347000  |
| 6 | 5.671373000  | -1.664908000 | -0.683630000 |
| 1 | 2.031252000  | 2.508193000  | -1.085146000 |
| 1 | 0.982136000  | 1.476039000  | -2.053120000 |
| 1 | 1.525970000  | 4.177253000  | 1.286037000  |
| 7 | 0.040456000  | 2.928878000  | 0.516150000  |
| 1 | -2.170244000 | -3.139883000 | -2.257917000 |
| 6 | -4.467098000 | -3.669695000 | -0.867841000 |
| 1 | 0.223388000  | -0.582993000 | -2.306699000 |
| 1 | -0.403162000 | -2.082054000 | -2.999694000 |
| 6 | -0.466256000 | 1.687145000  | 0.094855000  |
| 1 | 5.976547000  | -1.467609000 | -1.718418000 |
| 1 | 5.794133000  | -2.736800000 | -0.489085000 |
| 6 | -0.643823000 | 3.924324000  | -0.062679000 |
| 1 | -5.448935000 | -3.309737000 | -0.537771000 |
| 1 | -4.290294000 | -4.632000000 | -0.366212000 |
| 1 | -4.519877000 | -3.871057000 | -1.944338000 |
| 6 | -1.494966000 | 2.019157000  | -0.754739000 |
| 1 | -0.464397000 | 4.979558000  | 0.080963000  |
| 7 | -1.584679000 | 3.396400000  | -0.846890000 |
| 1 | -2.168740000 | 1.387297000  | -1.312253000 |
| 6 | -2.549031000 | 4.142286000  | -1.656028000 |
| 1 | -2.351188000 | 5.209295000  | -1.545578000 |
| 1 | -3.562271000 | 3.917505000  | -1.313737000 |
| 1 | -2.441697000 | 3.854428000  | -2.704608000 |
| 7 | 0.356014000  | 0.418987000  | 3.320069000  |

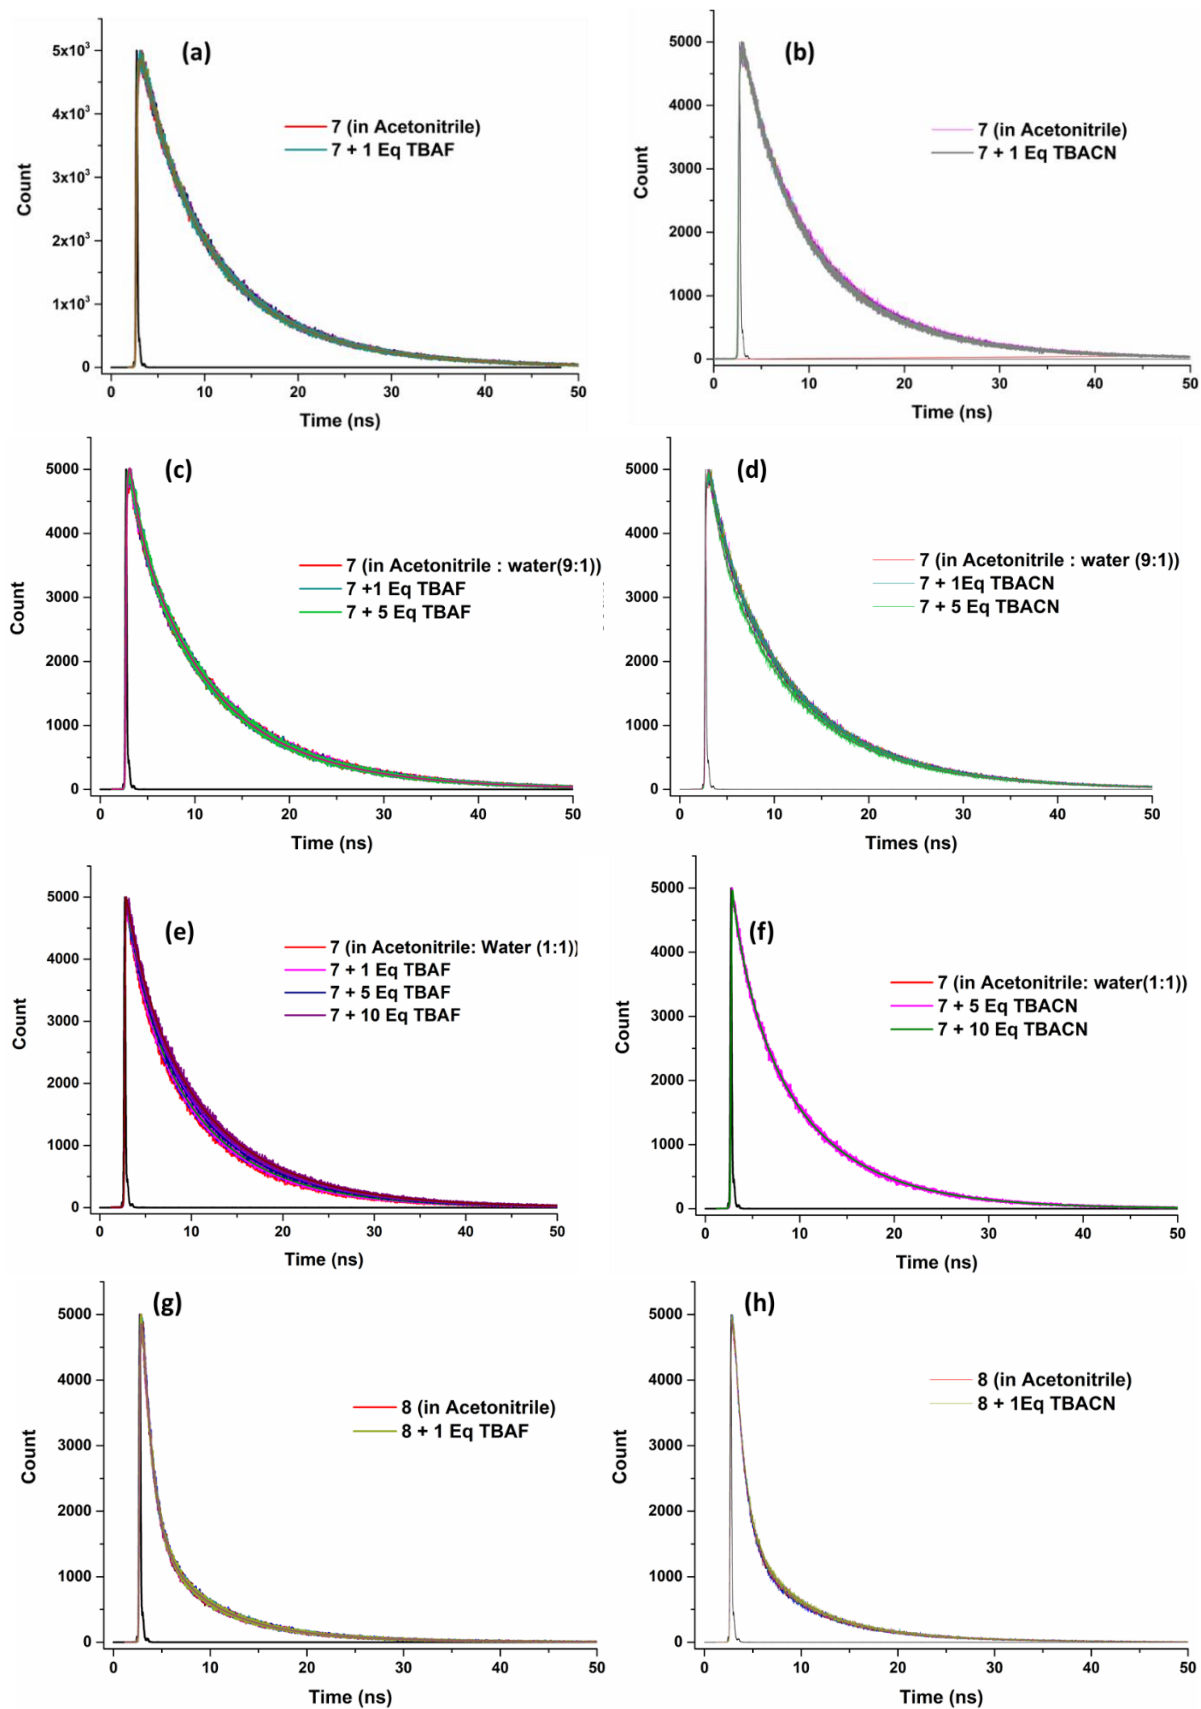

**Figure S60:** Lifetime change spectra of the compounds **7(a-f)** and **8(g-h)** upon complexation with TBAF and TBACN

**Table S10:** Average lifetime of **7** and **8** with TBAF and TBACN

| Compound | Solvent                  | Avg. lifetime ( $\tau_{av}$ ) (only compound) (ns) | Avg. lifetime $\tau_{av}$ (in presence of anions) (ns) |
|----------|--------------------------|----------------------------------------------------|--------------------------------------------------------|
| <b>7</b> | acetonitrile             | 9.21                                               | 9.12 (1 eq. fluoride)                                  |
| <b>7</b> | acetonitrile             | 9.14                                               | 9.01 (1 eq. cyanide)                                   |
| <b>7</b> | acetonitrile:water(9:1)  | 9.16                                               | 9.19 (5 eq. fluoride)                                  |
| <b>7</b> | acetonitrile:water(9:1)  | 9.30                                               | 9.16 (5 eq. cyanide)                                   |
| <b>7</b> | acetonitrile: water(1:1) | 7.66                                               | 8.10 (10 eq. fluoride)                                 |
| <b>7</b> | acetonitrile: water(1:1) | 7.64                                               | 7.90 (10 eq. cyanide)                                  |
| <b>8</b> | acetonitrile             | 5.73                                               | 5.71 (1 eq. fluoride)                                  |
| <b>8</b> | acetonitrile             | 5.78                                               | 5.80 (1 eq. cyanide)                                   |

**Image showing competitive binding of anions**

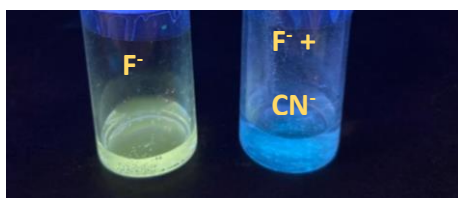

**Figure S61:** Images taken under UV light (365 nm) upon addition of solution of **7** in acetonitrile:water (9:1) to (a) aq. TBAF solution (25  $\mu$ M; left) and (b) first aq. TBAF solution (25  $\mu$ M) and then aq. TBACN solution (25  $\mu$ M; right).

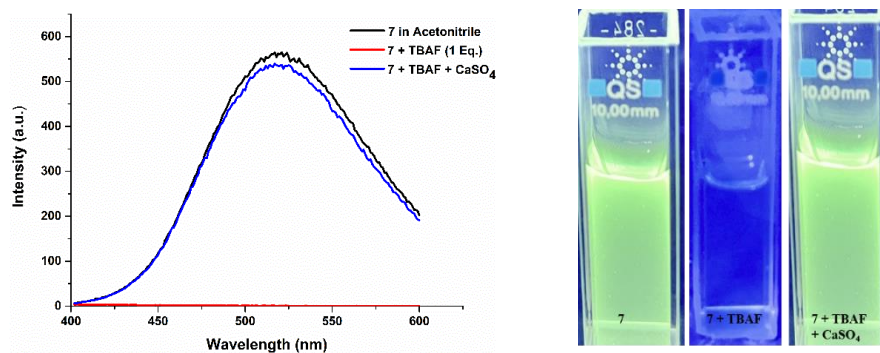

**Figure S62:** Experiments studies on reversibility of compound 7.
